# Supplementary material for: Metabolomics of a cell line-derived xenograft model reveals circulating metabolic signatures for malignant mesothelioma
Source: PeerJ journal article supplement (doi:10.7717/peerj.12568), 2022-01-04

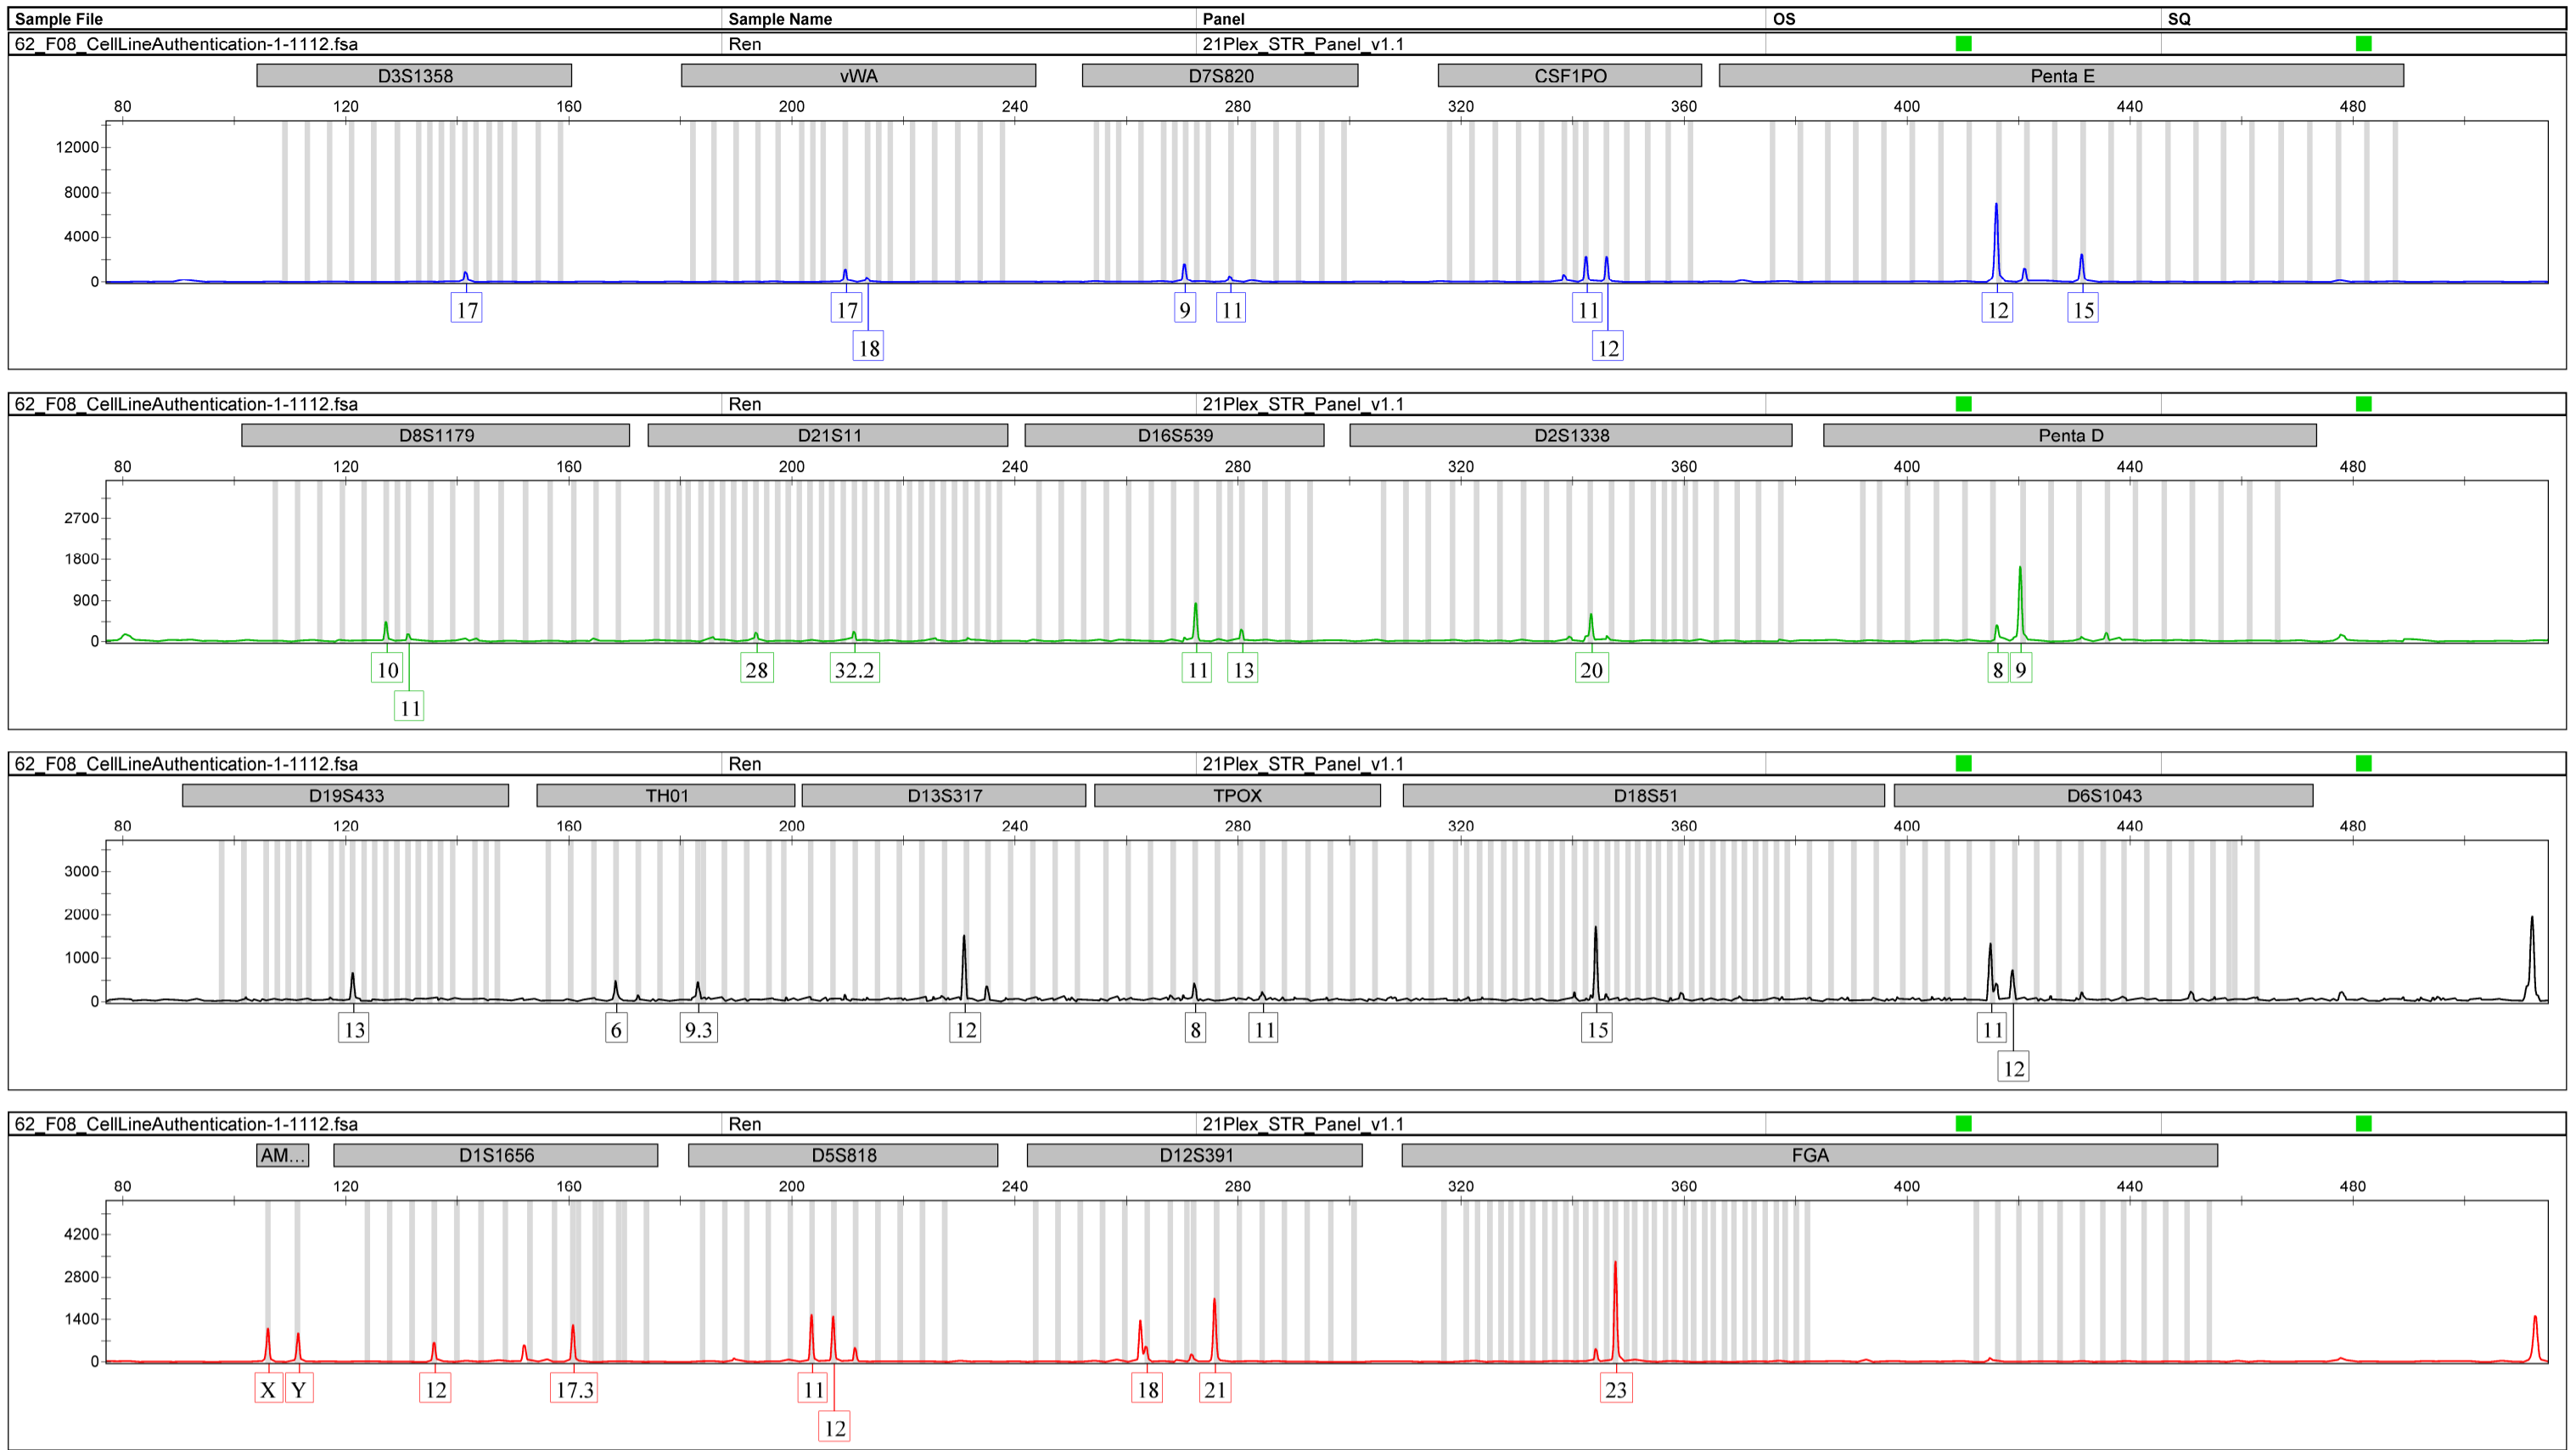

Supplement: Ren.pdf [file Ren.pdf]
