# Supplementary material for: Metabolomics of a cell line-derived xenograft model reveals circulating metabolic signatures for malignant mesothelioma
Source: PeerJ. 2022 Jan 4;10:e12568. doi: 10.7717/peerj.12568 (PMC8740518; doi:10.7717/peerj.12568)
Supplement: Supplemental Information 5 [file peerj-10-12568-s005.xlsx]

## Sheet: Sheet1
gene	pvalue	coxpvalue	HR	HR_low	HR_high
A1BG	0.0436533	0.0455495	1.62423	1.00965	2.6129
AADACL3	0.0416688	0.0459186	0.488011	0.241272	0.987082
AADAT	0.00206429	0.00258393	2.14432	1.3056	3.52185
ABCA13	0.00807602	0.0091288	0.527439	0.326073	0.853159
ABCA2	0.0176389	0.0189704	1.76422	1.09794	2.83482
ABCA4	0.0169699	0.0182141	1.78784	1.10378	2.89586
ABCA9	0.00461011	0.00533621	0.507157	0.314564	0.817666
ABCB10	0.0100079	0.0110133	1.86086	1.15286	3.00365
ABCB11	0.0303663	0.0317914	1.68628	1.04658	2.71698
ABCB7	0.0181949	0.019797	0.567846	0.352784	0.914014
ABCC1	0.0272433	0.028833	1.70592	1.05673	2.75393
ABCC4	0.00407303	0.00476009	1.98899	1.23391	3.20613
ABCE1	0.0399523	0.0417475	1.63727	1.01859	2.63172
ABCG4	0.0161222	0.0174476	1.79978	1.10864	2.92179
ABCG5	0.00372905	0.0044198	0.49994	0.310177	0.805798
ABHD12	0.0307768	0.0324524	1.67352	1.04399	2.68264
ABHD12B	0.015464	0.0168464	0.560401	0.348541	0.901038
ABHD14B	0.0110624	0.0122413	0.540602	0.334107	0.874723
ABHD17C	2.83446e-05	5.41815e-05	2.86318	1.71806	4.77154
ABHD3	0.00361485	0.00425968	2.00159	1.2437	3.22133
ABHD4	0.0223758	0.0239297	0.580278	0.361821	0.930634
ABI3BP	0.0364536	0.0382174	1.67285	1.02834	2.72131
ABL2	0.0031382	0.00377084	2.05691	1.26267	3.35073
ABLIM1	0.00291011	0.00353677	0.485714	0.298978	0.789081
ABO	0.0222175	0.0236638	0.577214	0.358584	0.929143
ABRACL	0.0392973	0.0409444	1.63801	1.02052	2.62913
AC004381.6	0.0346881	0.0361963	1.65337	1.03287	2.64661
AC006547.14	0.0133924	0.014764	1.8249	1.12521	2.9597
AC007326.1	2.37255e-13	1.77786e-06	32.1138	7.73623	133.307
AC010547.9	0.0398706	0.0416148	0.602402	0.369942	0.980933
AC010642.1	0.0119194	0.0131199	1.84562	1.13724	2.99526
AC025263.3	0.0163427	0.0312819	5.0214	1.15604	21.811
AC037459.4	0.00577891	0.00669543	1.97456	1.20755	3.22875
AC068533.7	0.0298241	0.0317848	1.7438	1.04966	2.89697
AC069368.3	0.00583683	0.00669304	1.95808	1.20477	3.18241
AC073610.5	0.0198835	0.0449954	8.20303	1.04808	64.2028
AC087392.1	0.017805	0.0310293	0.209877	0.0507904	0.867261
AC100821.2	0.0434492	0.0470086	1.94251	1.00882	3.74038
AC114494.1	0.00261355	0.00314132	2.04379	1.27184	3.28428
AC241585.2	0.00389225	0.00461211	0.487827	0.296889	0.801564
AC245100.1	0.0129099	0.0141815	0.549158	0.34016	0.886568
ACAA1	0.00480728	0.00559754	0.505161	0.311617	0.818913
ACACB	0.00611573	0.00696153	0.519829	0.323221	0.83603
ACADSB	0.00813576	0.00918872	0.532137	0.331043	0.855388
ACAN	0.00256879	0.00307574	2.05906	1.27637	3.3217
ACAT2	0.00246376	0.00302182	2.09106	1.28419	3.40488
ACBD4	0.00233579	0.00283924	0.481081	0.297533	0.777859
ACCS	0.00343608	0.00409216	0.491845	0.303002	0.798385
ACE	0.0326114	0.0340749	1.66133	1.03888	2.65673
ACE2	0.016663	0.0180375	0.5572	0.343169	0.904721
ACHE	0.00263788	0.00313891	2.05575	1.27439	3.31619
ACLY	0.00151237	0.00191046	2.17623	1.33185	3.55595
ACOT4	0.0282072	0.0299904	0.587253	0.363117	0.949737
ACOT7	4.54168e-06	1.10212e-05	3.06948	1.86171	5.06079
ACOX2	0.000653559	0.000898445	0.434116	0.265278	0.710413
ACPP	0.0138278	0.0151386	0.552892	0.342752	0.891867
ACPT	0.00496755	0.00577032	1.96142	1.21576	3.16442
ACRV1	3.21402e-08	1.8762e-07	3.84673	2.31758	6.38482
ACSF2	0.0355242	0.0373545	0.60096	0.372083	0.970622
ACSL5	0.000365525	0.000523039	0.409339	0.247111	0.67807
ACSM3	0.00136358	0.00173995	0.466413	0.289368	0.751781
ACSM5	0.00347146	0.00406136	0.489714	0.300918	0.796963
ACSS3	0.0207275	0.0221666	0.576229	0.359311	0.924104
ACTA1	0.0475829	0.0496539	1.6034	1.00071	2.56905
ACTA2	0.000392047	0.00055464	2.35483	1.44818	3.82909
ACTB	0.00114542	0.00145187	2.16116	1.34485	3.47297
ACTG2	0.00744686	0.00833398	1.91162	1.18126	3.09354
ACTL8	0.00103457	0.00137658	2.27577	1.37517	3.76614
ACTN1	6.27657e-05	0.000103953	2.63026	1.614	4.28643
ACTN2	0.0199301	0.0214667	0.567126	0.34974	0.91963
ACTN4	0.00614622	0.00688344	1.93575	1.19897	3.12529
ACTR2	0.000378371	0.000536043	2.41185	1.46518	3.97018
ACVR1C	0.0474615	0.0494709	0.617289	0.381472	0.998884
ACVR2A	0.0122991	0.0134969	1.85334	1.13596	3.02376
ACVRL1	0.00911466	0.0101074	1.87175	1.1609	3.01787
ADA	0.0120091	0.0131037	1.81315	1.1331	2.90133
ADAD2	0.00430389	0.00501998	1.97784	1.22825	3.1849
ADAM10	0.0113986	0.0126103	1.85843	1.14204	3.02419
ADAM12	0.00305586	0.00361574	2.04569	1.2632	3.31289
ADAM17	0.0053906	0.0062158	1.9759	1.21312	3.21829
ADAM18	0.00896472	0.0100181	1.88619	1.1637	3.05726
ADAM19	0.00560439	0.0063619	1.93971	1.20517	3.12195
ADAM21	0.00728731	0.00822019	1.89374	1.1794	3.04074
ADAM9	0.0224361	0.0238437	1.74472	1.07661	2.82744
ADAMTS1	0.00170321	0.00214312	2.1614	1.32132	3.53561
ADAMTS12	0.00046503	0.000658597	2.3883	1.44723	3.94132
ADAMTS14	0.00287596	0.00346615	2.06534	1.26994	3.35891
ADAMTS16	0.00358415	0.00424837	2.03463	1.2503	3.31098
ADAMTS17	0.0180996	0.0196066	1.80379	1.0991	2.9603
ADAMTS3	0.0141552	0.0153867	1.79421	1.11822	2.87886
ADAMTS4	0.000750962	0.00100595	2.31455	1.40367	3.81652
ADAMTS5	0.00237639	0.00287956	2.08212	1.28542	3.37261
ADAMTS6	1.22209e-05	2.5963e-05	2.98131	1.79205	4.95979
ADAMTS8	0.00487742	0.00565252	0.507904	0.314339	0.820664
ADAMTSL5	0.0012277	0.0015802	2.16079	1.3398	3.48484
ADARB1	0.00346057	0.00408295	2.0308	1.25222	3.29347
ADCK1	0.00741803	0.00843859	0.524197	0.324167	0.847655
ADCK3	0.00239971	0.00295031	0.473678	0.289424	0.775232
ADCY4	0.0176484	0.0190148	1.77527	1.09888	2.868
ADCY7	0.0332118	0.0350559	1.66165	1.03624	2.66451
ADH1A	0.00100197	0.00129794	0.454866	0.281457	0.735115
ADH1B	2.88318e-06	7.48155e-06	0.320023	0.194392	0.526846
ADH1C	0.0160315	0.0173109	0.563176	0.350994	0.903627
ADH5	0.017437	0.0189573	0.563589	0.34909	0.909888
ADHFE1	0.00354171	0.00416063	0.496401	0.307469	0.801425
ADK	0.0126484	0.0138622	1.82452	1.13019	2.9454
ADM2	0.0183729	0.0196805	1.75727	1.09419	2.82216
ADM5	0.0440795	0.0457009	1.61791	1.00924	2.59367
ADNP2	0.00359517	0.00418302	2.01132	1.2468	3.24463
ADORA2B	0.00243886	0.00294968	2.0665	1.28059	3.33474
ADRA1B	0.0397427	0.0419843	0.608902	0.377489	0.982179
ADSS	0.00414597	0.00481896	2.01976	1.23887	3.29286
AFAP1L2	0.018285	0.0198387	1.7565	1.09345	2.82161
AFM	0.00171671	0.0135726	14.4723	1.73396	120.792
AFP	0.026438	0.0278061	1.70981	1.06027	2.75726
AGFG2	4.05293e-05	7.47028e-05	0.368271	0.224641	0.603735
AGK	0.0167889	0.0182201	1.7914	1.10412	2.90649
AGMAT	0.012169	0.0133127	1.81338	1.13192	2.90512
AGO2	0.00101563	0.00131449	2.20555	1.3613	3.57338
AGPAT1	0.0376826	0.0397222	0.603437	0.372885	0.976539
AGPAT4	0.0103221	0.0115082	1.89411	1.15408	3.10866
AGPAT5	0.00434371	0.00507433	2.01303	1.23405	3.28375
AGPAT6	0.00724972	0.00814512	1.89885	1.18088	3.05335
AGPS	0.0142593	0.0154714	1.79982	1.11845	2.8963
AHNAK2	0.0293089	0.0308287	1.68581	1.04939	2.7082
AHRR	0.0383535	0.0402025	1.6563	1.02281	2.68217
AIF1L	0.00194206	0.00239514	2.13318	1.30808	3.47871
AIG1	0.0236177	0.0250733	1.72728	1.07078	2.78628
AIP	0.0139206	0.0153763	0.547479	0.336331	0.891184
AIPL1	0.0471893	0.0488523	0.61931	0.384471	0.997591
AK5	0.0135453	0.0148216	1.80525	1.12251	2.90323
AK7	0.0146233	0.0158942	0.556518	0.345622	0.896101
AK8	0.04071	0.0427711	0.61181	0.380348	0.984127
AKAP12	0.0319967	0.0338224	1.67711	1.04032	2.70368
AKAP2	0.000982888	0.00129938	2.2666	1.37658	3.73205
AKIRIN2	0.00674735	0.00763675	1.90382	1.18628	3.05538
AKT1S1	0.0138278	0.0151391	1.80425	1.12071	2.9047
AKT2	0.0273028	0.0289388	1.70101	1.05608	2.73979
AKTIP	0.0198498	0.021218	1.76487	1.08855	2.86139
AL358852.1	0.0254686	0.0270826	0.58509	0.363757	0.941095
ALAS2	1.53828e-05	3.20716e-05	2.85756	1.74206	4.68733
ALCAM	0.0043071	0.00504026	2.01151	1.23424	3.2783
ALDH18A1	0.046702	0.0486046	1.60885	1.00292	2.58085
ALDH1A3	0.00453582	0.00529033	2.00666	1.22997	3.27378
ALDH1L1	0.0105404	0.0116368	0.542344	0.337168	0.872374
ALDH1L2	0.0168218	0.0184019	1.76611	1.10065	2.83391
ALDH2	0.00449614	0.00522228	0.50384	0.311443	0.815092
ALDH3A1	0.0251127	0.0266842	0.583979	0.362906	0.939723
ALDH3A2	0.00272071	0.00328612	0.48003	0.294278	0.783032
ALG10B	0.016963	0.0183229	0.562379	0.348614	0.907223
ALG9	0.0458841	0.0479122	1.62618	1.00448	2.63268
ALKBH7	0.0296137	0.0313164	0.585501	0.359667	0.953134
ALMS1	0.0068078	0.00770618	1.91878	1.18809	3.09885
ALPK1	0.00564248	0.00648465	0.512734	0.31697	0.829405
ALPK2	0.000140879	0.000218453	2.47549	1.53089	4.00295
ALPK3	0.00525772	0.00607894	1.9779	1.21505	3.21968
ALPP	0.000196079	0.000300225	2.48792	1.51785	4.07797
ALPPL2	0.0187067	0.0201092	1.76542	1.09319	2.85102
ALS2	0.00856603	0.00945629	1.87899	1.16692	3.02558
ALS2CR12	0.0298405	0.0316543	1.68535	1.04693	2.71308
ALX4	0.0304488	0.0320863	1.69856	1.04637	2.75726
AMH	0.000105739	0.000174049	2.56775	1.56937	4.20128
AMIGO2	0.0165581	0.0179379	1.77116	1.10327	2.84336
AMMECR1L	0.0149247	0.0161094	1.79298	1.11441	2.88473
AMN	0.0389356	0.0407905	0.610129	0.380043	0.979516
AMOT	0.0239371	0.0254691	0.582757	0.362879	0.935866
AMPH	0.0339796	0.0357766	1.6566	1.03411	2.65382
AMTN	0.0396323	0.0413486	1.63936	1.01959	2.63588
AMY2B	0.0173303	0.0187155	0.564313	0.350253	0.909196
AMZ1	0.0406816	0.0425621	1.63785	1.01669	2.63852
ANAPC1	0.0361075	0.0378797	1.64865	1.02837	2.64305
ANAPC16	0.0240069	0.0257149	0.576334	0.35512	0.935348
ANAPC5	0.0366432	0.0382096	1.64879	1.02755	2.64563
ANAPC7	0.0464576	0.0480864	1.60909	1.00401	2.57882
ANGPT2	0.000547007	0.000756053	2.34053	1.42699	3.8389
ANGPTL3	0.0143904	0.0159004	1.81781	1.11833	2.95478
ANGPTL4	0.0013574	0.00174548	2.19962	1.34278	3.60323
ANK1	0.0302547	0.0316936	1.67973	1.04651	2.6961
ANK2	0.0360164	0.037668	1.65702	1.02921	2.6678
ANKHD1-EIF4EBP3	0.000417603	0.000585509	0.420709	0.256823	0.689177
ANKIB1	0.0281837	0.0298277	1.6917	1.05275	2.71845
ANKRD1	0.00818439	0.00911984	1.87683	1.16924	3.01262
ANKRD13A	0.0313673	0.0327252	1.67673	1.04339	2.69452
ANKRD27	0.00922246	0.0103336	1.88355	1.16096	3.05588
ANKRD28	0.00145977	0.00187238	2.21128	1.341	3.64636
ANKRD34B	7.86165e-05	0.000128566	2.5673	1.58448	4.15974
ANKRD36B	0.0479257	0.04986	1.60163	1.00029	2.56447
ANKRD36C	0.0184932	0.0199589	1.77742	1.09499	2.88516
ANKRD52	6.66409e-05	0.00011258	2.60503	1.60241	4.23498
ANKRD9	0.0187498	0.0204447	0.562557	0.345883	0.914962
ANKS1B	0.015543	0.016774	0.560386	0.348634	0.900751
ANLN	1.07655e-07	5.02266e-07	3.6373	2.19822	6.01848
ANO10	0.0192575	0.0205126	1.76359	1.09132	2.84998
ANO4	0.0397293	0.0415401	1.62899	1.01888	2.60444
ANO5	0.0210733	0.0226808	0.574547	0.356715	0.925399
ANO9	0.01371	0.0149092	0.551914	0.34203	0.890591
ANP32A	0.0313251	0.0328066	1.67154	1.04289	2.67912
ANP32E	7.89638e-06	1.74857e-05	2.97549	1.80903	4.89407
ANXA2	0.00222859	0.0027148	2.07196	1.28696	3.33578
ANXA5	0.00141046	0.00182766	2.20234	1.34052	3.61824
ANXA6	0.0404026	0.0422462	1.63393	1.01734	2.62423
ANXA8	0.00885419	0.00988577	0.528518	0.32558	0.857948
ANXA8L1	0.00324111	0.00384769	0.486726	0.298699	0.793115
ANXA9	0.037226	0.0389097	0.606078	0.376819	0.97482
AP003419.11	0.0435488	0.0462119	1.67529	1.00871	2.78236
AP006285.2	0.0223125	0.0239535	1.75291	1.07687	2.85335
AP1M2	0.00468433	0.00550336	1.96627	1.21989	3.16933
AP2A1	0.00464522	0.00533344	1.96467	1.22172	3.15942
AP2S1	0.00113215	0.00143696	2.17431	1.34859	3.50558
AP3B2	0.0435073	0.0452995	0.613608	0.380384	0.98983
APBB2	0.0450762	0.0469608	1.61081	1.00643	2.57813
APC2	0.0446807	0.0465069	1.62424	1.00753	2.61843
APCDD1L	0.000867708	0.00115641	2.24861	1.37927	3.6659
APITD1-CORT	0.00394586	0.00473696	0.496966	0.305911	0.807343
APLN	0.0343241	0.0358541	1.66733	1.03434	2.68767
APLNR	0.00357636	0.0041878	2.03507	1.25135	3.30962
APMAP	4.90127e-06	1.19565e-05	3.04346	1.84923	5.00894
APOBEC1	0.00171671	0.0135726	14.4723	1.73396	120.792
APOC4-APOC2	0.0108589	0.0120325	0.530971	0.323959	0.870264
APOL3	0.0104634	0.0115882	0.532723	0.326707	0.868649
APOL6	0.0160407	0.0174778	0.558128	0.345031	0.902837
APOLD1	0.0182203	0.0194175	1.76568	1.09616	2.84415
APOM	6.76712e-05	0.000117781	0.375563	0.22814	0.618251
APOOL	0.0302085	0.0322656	0.590508	0.364591	0.956413
AQP12A	0.00498995	0.0083608	3.50494	1.37996	8.90218
AQP9	0.00190509	0.00232446	0.474624	0.293797	0.766746
ARAP3	0.000900353	0.00118901	2.27615	1.38427	3.74267
ARC	0.000356565	0.000509437	2.41583	1.46912	3.97261
ARFGAP1	0.00505939	0.0058807	1.9483	1.21211	3.13165
ARFGAP3	0.00512367	0.00589176	1.96662	1.21525	3.18253
ARG2	0.0186538	0.0199896	1.75782	1.09295	2.82714
ARHGAP10	8.2993e-05	0.000138936	2.64157	1.60268	4.35387
ARHGAP11A	0.000260753	0.000389936	2.43396	1.4888	3.97914
ARHGAP11B	0.000153241	0.000243675	2.53522	1.54234	4.16725
ARHGAP19-SLIT1	0.0413378	0.0432165	1.62953	1.015	2.61611
ARHGAP24	0.00639374	0.00723483	1.93425	1.19518	3.13035
ARHGAP29	0.0173692	0.018633	1.77646	1.10069	2.86711
ARHGAP31	0.000953492	0.00126523	2.27498	1.38021	3.74984
ARHGAP33	0.0165515	0.0182742	1.7906	1.10379	2.90476
ARHGAP35	0.00185838	0.00227607	2.11328	1.30691	3.41717
ARHGAP42	0.00610321	0.00693424	1.94651	1.20027	3.1567
ARHGAP44	0.000460851	0.000650486	0.427424	0.262219	0.69671
ARHGEF10L	0.00504352	0.0058544	0.506706	0.312447	0.821742
ARHGEF15	0.000850188	0.00111923	2.28478	1.39	3.75555
ARHGEF19	0.00258365	0.00312041	2.06958	1.27765	3.35238
ARHGEF26	4.73827e-05	8.53744e-05	2.70756	1.64732	4.45019
ARHGEF33	0.0272575	0.0289781	0.588254	0.365382	0.94707
ARHGEF35	0.00025451	0.000378365	0.40853	0.249383	0.669241
ARID3A	0.0133241	0.0146481	1.79596	1.1223	2.87397
ARID3C	0.0153827	0.0166399	1.79433	1.11194	2.89549
ARL14EP	0.03592	0.0375753	0.603524	0.374965	0.971399
ARL17B	0.00729694	0.0083107	1.92547	1.18366	3.13218
ARL3	0.0311458	0.0327791	1.681	1.04345	2.70809
ARL6IP1	0.0183831	0.0196939	1.75279	1.09369	2.80908
ARMCX1	0.0109902	0.0122152	0.542737	0.33651	0.875347
ARMCX2	0.0272933	0.0289839	0.589073	0.366341	0.947222
ARMCX5	0.0188779	0.0203543	0.565741	0.349626	0.915443
ARMCX6	0.0366883	0.0382522	1.66073	1.02784	2.6833
ARNTL2	0.000195914	0.000304802	2.48026	1.5149	4.0608
ARPC5L	0.0468686	0.0485031	1.60831	1.00313	2.57859
ARPP21	0.0281602	0.0299928	1.70616	1.05311	2.76417
ARSB	0.00692934	0.00787229	1.9147	1.18589	3.09141
ARSG	5.62582e-05	0.000100244	2.6664	1.62676	4.37046
ARSI	0.00326254	0.00389331	2.0356	1.25632	3.29827
ARSJ	0.0442337	0.0459317	1.61629	1.00871	2.58983
ARSK	0.0122833	0.0135016	1.83317	1.13337	2.96507
ART4	0.00148471	0.00186266	2.14728	1.32683	3.47507
ARTN	0.000295854	0.000435199	2.38154	1.46854	3.86215
ASAP1	0.0056489	0.00650018	1.95225	1.20585	3.16068
ASAP2	0.025567	0.0270818	1.70938	1.06261	2.7498
ASB4	0.0240221	0.025448	0.579281	0.358851	0.935115
ASF1B	3.56901e-07	1.2427e-06	3.53005	2.12009	5.87769
ASIC4	0.00460557	0.00538448	2.00582	1.22858	3.27474
ASIC5	0.00268152	0.00336493	2.21646	1.30202	3.77313
ASL	0.0175958	0.0187988	1.7557	1.09781	2.80783
ASNS	0.00143694	0.00180296	2.16086	1.33192	3.5057
ASPM	0.0117164	0.0129235	1.82683	1.13596	2.93786
ASPRV1	0.0091972	0.0102661	0.535675	0.332575	0.862805
ASTL	0.00893332	0.010082	1.88205	1.16261	3.04671
ASTN2	0.0418177	0.0437727	0.613646	0.381731	0.986457
ATAD2	0.00538287	0.0062012	1.95869	1.21028	3.1699
ATAD3A	0.0230855	0.0247204	1.71932	1.0714	2.75909
ATAD5	0.000418549	0.000598511	2.35565	1.44418	3.84238
ATG101	0.00165362	0.00206288	2.11445	1.31319	3.40462
ATG7	0.0279352	0.0298798	0.584565	0.360078	0.949005
ATG9B	0.0244548	0.0262053	1.71456	1.06591	2.75795
ATHL1	0.00707122	0.00797413	1.91672	1.18529	3.09951
ATL1	0.00513397	0.00594048	0.511969	0.317758	0.82488
ATOH7	0.0445225	0.0463304	0.617522	0.384335	0.99219
ATP13A3	0.0117994	0.0130661	1.84712	1.13775	2.99877
ATP1A1	0.0475914	0.0497304	0.618186	0.382371	0.999434
ATP1B3	0.031107	0.0328478	1.67631	1.04302	2.69414
ATP2A1	0.00448485	0.00529863	2.00938	1.23036	3.28164
ATP2C1	0.0138229	0.0150508	1.82099	1.12318	2.95232
ATP5EP2	0.00282426	0.00339466	2.02408	1.26285	3.24417
ATP6V0A2	0.0201591	0.021472	1.74482	1.08568	2.80413
ATP6V0A4	0.00762047	0.00852043	1.90279	1.17825	3.07289
ATP6V1G3	0.0098236	0.0108894	1.85038	1.15222	2.97157
ATP7A	0.0217078	0.0231937	0.576933	0.358837	0.927585
ATP8A1	0.0063162	0.0072212	0.521184	0.323978	0.838428
ATP8B1	0.00083334	0.00108953	2.27918	1.39025	3.7365
AUH	0.00826972	0.00931084	0.528792	0.327132	0.854767
AUNIP	7.38171e-08	3.68195e-07	3.81321	2.27628	6.38788
AURKA	1.45159e-05	3.02507e-05	2.86141	1.74607	4.6892
AURKB	3.75731e-09	2.9851e-08	4.32323	2.5761	7.25527
AVEN	0.0223076	0.0236394	1.72665	1.07587	2.77109
AVPI1	0.0397102	0.0417634	0.608875	0.37765	0.981672
AVPR1A	0.0341444	0.0359597	1.6706	1.0342	2.69864
AVPR2	0.0194749	0.0209072	1.75238	1.08864	2.82078
AWAT2	0.0105684	0.0118657	1.96942	1.16161	3.339
AXIN2	0.00507505	0.00589182	0.511021	0.316899	0.824055
AXL	0.000166893	0.000254975	2.44875	1.51531	3.95719
AZIN1	0.00986972	0.0109569	1.87783	1.15566	3.0513
B3GALNT2	0.00102534	0.00131573	2.20564	1.36127	3.57375
B3GALT4	0.0350222	0.0371456	0.602154	0.373716	0.970225
B3GAT2	0.0297932	0.0315885	1.68093	1.04688	2.69902
B3GNT3	0.0163253	0.017582	1.78006	1.10587	2.86528
B3GNT5	0.00015384	0.000241818	2.55989	1.54973	4.22849
B3GNT7	0.0439334	0.0455086	0.612984	0.379442	0.990269
B4GALNT1	9.18638e-06	2.06335e-05	2.97985	1.80268	4.92572
B4GALNT3	0.0169816	0.0183935	1.76038	1.10008	2.81703
B4GAT1	0.0253155	0.0270017	0.582178	0.36044	0.940325
B9D1	0.00624502	0.00714084	0.515821	0.318448	0.835525
BAG1	0.018409	0.0198291	0.563201	0.347445	0.912937
BAG2	0.00493597	0.00560662	1.96525	1.21843	3.16982
BAG3	0.0108703	0.0120806	1.8474	1.14392	2.98352
BAHD1	0.0172798	0.0185638	0.56022	0.345824	0.907532
BAIAP2L2	0.0064419	0.00723723	1.91812	1.19245	3.08539
BANK1	0.0466066	0.0489417	0.617179	0.381764	0.997764
BARD1	9.20925e-05	0.000150403	2.59807	1.58577	4.25658
BARHL1	0.000184622	0.000316094	2.74437	1.58436	4.7537
BARX1	0.0223195	0.0240988	1.72444	1.07402	2.76876
BATF3	0.00257209	0.00310873	2.04788	1.27335	3.2935
BAX	0.0111531	0.0122307	1.83948	1.1419	2.9632
BBC3	0.0166606	0.018065	1.76629	1.10218	2.83058
BBS1	0.040468	0.0421843	0.613036	0.382362	0.982871
BBS12	0.0402694	0.042309	0.61115	0.379945	0.983047
BCAS4	0.016006	0.0174354	1.78302	1.10688	2.87221
BCDIN3D	0.0220903	0.0236914	0.574426	0.355325	0.92863
BCL2L10	0.00782366	0.00898964	1.92892	1.17831	3.15769
BCL2L12	2.65992e-06	6.99321e-06	3.16276	1.91411	5.22593
BCL2L13	0.0281127	0.0299485	0.588693	0.364858	0.949847
BCL6B	0.000189115	0.000287267	2.54441	1.53598	4.2149
BCL7A	0.000936195	0.0011985	2.23955	1.37496	3.64781
BCO1	0.000313675	0.000465787	0.417175	0.255671	0.680698
BCO2	0.014536	0.015741	0.555813	0.345069	0.895263
BCR	0.0399494	0.042066	0.609466	0.378104	0.982399
BDH2	4.03842e-05	7.28592e-05	0.374839	0.230825	0.608706
BDNF	0.000729243	0.000975187	2.25077	1.38969	3.6454
BEND3	0.00211254	0.00257741	2.11264	1.29898	3.43597
BEND5	0.0329167	0.0346744	0.601126	0.374849	0.963995
BEND6	7.28093e-05	0.000126201	2.61964	1.60111	4.2861
BEST2	0.00133444	0.00173101	2.19784	1.34289	3.5971
BEST3	0.0360106	0.037794	1.65371	1.02877	2.65828
BEX2	0.0211301	0.0226159	0.578277	0.361117	0.926028
BEX4	0.0389451	0.0409682	0.612748	0.383085	0.980097
BHMG1	0.0334062	0.0356267	1.67784	1.03539	2.71893
BICD1	0.000121126	0.000193231	2.58413	1.56865	4.25698
BICD2	0.0018094	0.00223114	2.10219	1.30568	3.38462
BIRC5	8.82059e-09	6.04326e-08	4.1277	2.47147	6.89384
BLM	1.67966e-05	3.39679e-05	2.81697	1.72627	4.59682
BLMH	0.000293982	0.000433537	2.40633	1.4755	3.92438
BMP2K	0.0216688	0.0232354	1.72587	1.07728	2.76496
BMP8B	0.00270055	0.00320809	2.06185	1.27426	3.33624
BMX	0.0409551	0.0427012	1.65659	1.01674	2.69911
BNC1	0.0443025	0.0458296	0.618087	0.385452	0.991126
BNIP2	0.00247558	0.00300118	2.09642	1.28575	3.4182
BOC	0.000259422	0.000387197	0.417713	0.25792	0.676505
BOLA1	0.0387817	0.0406984	0.604266	0.373007	0.978904
BOP1	0.00259434	0.00310998	2.04974	1.27372	3.29856
BORA	0.0215272	0.0230647	1.73153	1.0784	2.78023
BPIFB1	0.00373847	0.00453887	2.11263	1.26038	3.54117
BPIFC	0.0425583	0.0448362	1.63731	1.01143	2.65051
BRCA1	1.32186e-06	3.88336e-06	3.26212	1.97487	5.38841
BRCA2	0.0407632	0.042551	1.65017	1.01697	2.67763
BRINP1	0.0295816	0.0315387	0.586366	0.360454	0.953868
BRINP2	0.0327187	0.0343634	0.598447	0.37194	0.962895
BRIP1	5.23557e-07	2.06622e-06	3.5503	2.10407	5.99058
BRIX1	0.0275411	0.0290252	1.69518	1.05544	2.72271
BRPF1	0.00103092	0.00131895	2.20365	1.36065	3.56893
BRSK1	6.24399e-05	0.000105901	2.60584	1.60565	4.22904
BRWD3	0.00544913	0.00627538	1.96174	1.20998	3.18057
BTBD10	0.00175397	0.0021509	2.13968	1.31628	3.47816
BTBD16	0.0258495	0.0274538	0.581651	0.359317	0.941558
BTBD3	0.00662485	0.00749193	1.9281	1.19165	3.11969
BTC	0.0103523	0.0114722	0.53892	0.333713	0.870314
BTG2	0.018774	0.0203537	0.571097	0.355758	0.916781
BTG4	0.00548936	0.00636625	1.97103	1.21057	3.20919
BTN3A1	0.0331977	0.0351067	0.600406	0.373563	0.964999
BTN3A2	0.010929	0.0121593	0.541248	0.334971	0.874552
BTN3A3	0.00712934	0.00809125	0.526059	0.327019	0.846247
BTNL3	0.000989586	0.00129037	0.445917	0.272669	0.729244
BUB1	5.07352e-07	1.67101e-06	3.48093	2.08943	5.79912
BUB1B	0.000266914	0.000389225	2.44027	1.49063	3.99492
BZRAP1	0.0317376	0.0335165	0.597753	0.371947	0.960644
BZW2	4.8749e-05	8.64069e-05	2.684	1.63952	4.39388
C10orf11	0.00089211	0.00118201	0.441316	0.269191	0.723501
C10orf12	0.0201693	0.021637	1.74361	1.08492	2.80221
C10orf32	0.000454183	0.000644357	0.425942	0.260887	0.695424
C10orf32-ASMT	6.18565e-05	0.00155946	11.3073	2.51606	50.8158
C10orf54	0.00093168	0.00122486	0.441996	0.269438	0.725065
C10orf55	0.0383244	0.0402816	1.64602	1.02233	2.6502
C10orf67	0.0335484	0.0352094	1.65633	1.0356	2.64912
C10orf82	0.00101903	0.0013092	0.445848	0.272427	0.729664
C11orf1	0.00051085	0.000730874	0.421898	0.2557	0.696122
C11orf24	2.06693e-05	3.9201e-05	2.85401	1.7313	4.70478
C11orf30	0.0421196	0.0435274	1.63425	1.01437	2.63294
C11orf53	0.0112373	0.0124791	0.541123	0.334242	0.876053
C11orf54	0.00410505	0.00482461	0.501948	0.310814	0.81062
C11orf63	0.0214081	0.0230493	1.74187	1.07934	2.81109
C11orf71	0.0127446	0.0140298	0.54686	0.33786	0.885149
C11orf84	2.27517e-06	6.08183e-06	3.28467	1.96203	5.49895
C11orf88	0.0013862	0.00173903	2.15673	1.33315	3.48909
C11orf96	0.00199465	0.0024695	2.11037	1.30119	3.42275
C12orf29	0.0221235	0.0236674	1.726	1.07571	2.76939
C12orf73	0.0244535	0.0261033	1.72614	1.06711	2.79218
C12orf75	0.0399051	0.0415706	1.63461	1.01895	2.62226
C12orf76	0.0406994	0.0425286	1.62665	1.01653	2.60295
C14orf119	0.02637	0.0283392	0.582549	0.359385	0.944291
C14orf159	0.00711111	0.00809392	0.522836	0.323533	0.844913
C14orf37	0.00215181	0.00261863	2.08663	1.29238	3.36902
C14orf93	0.000946957	0.00125924	0.445569	0.272617	0.728243
C15orf57	0.0479879	0.0497411	0.6193	0.38374	0.999458
C15orf62	0.0252188	0.026822	0.576616	0.354176	0.93876
C16orf45	0.0193769	0.0208448	1.74515	1.08821	2.79867
C16orf46	0.0187971	0.0202966	0.570635	0.355304	0.916468
C16orf59	7.318e-06	1.71387e-05	2.96671	1.80706	4.87057
C16orf92	0.0037191	0.00509105	2.52908	1.32135	4.84071
C17orf104	0.0135688	0.0148832	1.81162	1.12296	2.92262
C17orf51	0.0059467	0.00676908	1.94115	1.20108	3.13724
C17orf53	9.52775e-05	0.000159559	2.61425	1.58746	4.30518
C17orf74	0.000110399	0.000204843	2.87442	1.64625	5.01887
C17orf96	0.00301342	0.00361236	2.02947	1.25998	3.26889
C17orf99	0.0136071	0.0148971	1.82617	1.12464	2.96532
C18orf32	0.0254136	0.0272085	0.579409	0.356981	0.940429
C18orf54	0.000143891	0.000224734	2.51532	1.54093	4.10583
C19orf26	2.09282e-06	6.00436e-06	3.20611	1.93588	5.3098
C19orf47	0.0036038	0.00421213	2.00985	1.24605	3.24182
C19orf57	0.0394928	0.0413843	1.65701	1.01993	2.69204
C19orf71	0.00948447	0.0105112	1.85937	1.15616	2.99028
C1orf106	0.00798375	0.00900052	1.9198	1.17683	3.13184
C1orf110	0.000984688	0.00128754	2.22377	1.36691	3.61778
C1orf112	0.00330989	0.00392664	2.02257	1.25317	3.26435
C1orf115	0.0233978	0.0251072	0.581171	0.361453	0.934453
C1orf185	0.00561461	0.00648496	1.97995	1.21078	3.23775
C1orf189	0.00944903	0.0106064	0.519397	0.314261	0.858435
C1orf198	0.0156094	0.0168819	1.79348	1.11067	2.89608
C1orf21	0.0171835	0.0185484	1.77055	1.10046	2.84867
C1QL4	0.00216201	0.00267547	2.1164	1.2974	3.45242
C1QTNF6	0.000489136	0.000674284	2.31441	1.42674	3.75437
C1R	0.00470807	0.00545552	0.507999	0.315066	0.819075
C20orf141	0.02121	0.0227504	1.74241	1.08052	2.80976
C20orf195	0.000767112	0.00104497	2.25884	1.38772	3.6768
C20orf202	0.0141228	0.0155352	1.83775	1.12256	3.0086
C21orf58	0.0355635	0.0376118	1.65212	1.02918	2.6521
C22orf23	0.00972242	0.0108165	1.8628	1.15451	3.00563
C22orf39	0.0422831	0.0441226	0.608746	0.375443	0.987026
C2CD4C	0.0379017	0.0394642	1.63606	1.02403	2.61387
C2orf50	0.0139014	0.0151808	0.55543	0.345532	0.892833
C2orf70	0.0201032	0.0215041	1.7412	1.08522	2.79369
C2orf74	0.000320167	0.000460935	0.409923	0.24887	0.675198
C3	0.000515656	0.00070793	0.435315	0.269003	0.704449
C3orf36	0.00102953	0.00133046	2.19674	1.35848	3.55228
C3orf58	0.00837706	0.00941747	1.92878	1.17473	3.16685
C3orf70	0.0120021	0.0131159	1.83186	1.13547	2.95534
C3orf80	0.0187995	0.0203632	1.7535	1.09097	2.81837
C4A	0.000562649	0.000774621	0.439089	0.271739	0.709502
C4B	0.0100439	0.0111566	0.540992	0.336611	0.869468
C4orf46	0.000827288	0.00108247	2.24477	1.38219	3.64564
C4orf50	0.0448645	0.0471469	0.616181	0.382002	0.993917
C5AR1	0.0449085	0.0466435	1.61084	1.00711	2.57649
C5orf30	0.0013702	0.00174578	2.15873	1.33338	3.49498
C5orf34	1.11454e-08	7.36466e-08	4.05904	2.437	6.7607
C5orf46	0.00648397	0.00737017	1.91945	1.19139	3.09243
C5orf47	0.019623	0.0212475	0.568064	0.351098	0.919108
C5orf56	0.000821518	0.00107785	0.433861	0.262994	0.715741
C5orf63	0.00273476	0.00327025	0.486506	0.300998	0.786344
C6orf132	0.0170936	0.0183211	1.76719	1.10112	2.83618
C6orf141	0.0171973	0.0186995	1.79214	1.10201	2.91446
C6orf15	0.0323314	0.0345956	1.7141	1.03982	2.82564
C6orf229	0.0289351	0.03062	1.70847	1.05132	2.7764
C6orf47	0.0149408	0.0164193	0.558952	0.347553	0.898934
C6orf52	0.0177108	0.0192724	1.76216	1.09643	2.83213
C7orf60	0.032334	0.0339252	1.67163	1.03977	2.68748
C7orf61	0.0234015	0.0252508	1.74672	1.07164	2.84706
C8G	0.0242673	0.0260616	1.7085	1.06595	2.7384
C8orf4	0.0210172	0.0223664	1.76601	1.08405	2.87697
C8orf48	0.0170368	0.0185689	1.78437	1.1018	2.88979
C8orf58	0.000216194	0.00031917	2.431	1.49867	3.94335
C8orf74	0.0365322	0.0415657	2.20356	1.03065	4.71127
C9orf171	0.035172	0.0373127	1.68528	1.03114	2.75437
C9orf40	5.26135e-06	1.25131e-05	3.05769	1.85189	5.04862
C9orf84	0.00721729	0.00807787	1.90438	1.18237	3.06731
CA10	0.0350239	0.0367223	0.601701	0.373571	0.969145
CA5B	0.0330141	0.0348679	1.67064	1.03714	2.69109
CAAP1	0.0178541	0.0192949	0.562227	0.347073	0.910758
CAB39L	0.0447915	0.0462551	0.619459	0.386793	0.992079
CABP2	2.7671e-11	0.000129129	47.8945	6.60683	347.2
CABYR	4.06556e-06	1.04425e-05	3.16054	1.89469	5.2721
CACHD1	0.00177079	0.00221059	0.472886	0.292725	0.763929
CACNA1C	0.0202606	0.0216616	1.74925	1.08534	2.81928
CACNA1S	0.00922964	0.0103899	1.89397	1.16206	3.08689
CACNA2D4	0.0473928	0.0490125	0.617914	0.382615	0.997919
CACNB1	7.32586e-05	0.000125976	2.60999	1.59831	4.26204
CACNB2	0.00725776	0.00817227	0.526996	0.327835	0.84715
CACNB3	0.00498765	0.00573385	1.99669	1.22251	3.26113
CACNG2	0.034659	0.0368642	1.6753	1.03197	2.71968
CACNG6	0.0221788	0.023711	1.74551	1.07717	2.82853
CACTIN	0.0157697	0.017086	1.78088	1.10829	2.86165
CAD	0.0137847	0.0149589	1.80348	1.12157	2.89999
CADPS2	0.0103188	0.0114733	0.538344	0.333077	0.87011
CALB2	0.000369156	0.000528873	0.421954	0.259024	0.68737
CALCOCO1	0.000780378	0.00103974	0.448765	0.278006	0.724409
CALD1	0.0437979	0.0460255	1.64211	1.00879	2.67303
CALM3	0.00765614	0.00859247	1.89357	1.17618	3.04853
CALML4	0.0305018	0.0319909	0.59565	0.370977	0.956391
CALU	6.77018e-06	1.56531e-05	3.04773	1.83807	5.05349
CAMK2A	0.00104365	0.00137886	2.18614	1.35384	3.53012
CAMK2B	0.0417688	0.0436523	1.62932	1.014	2.61804
CAMK2G	0.00360067	0.0042622	2.04001	1.25112	3.32633
CAMK2N2	2.97188e-05	5.32272e-05	2.75269	1.68448	4.4983
CAMK4	0.0227174	0.0243421	1.72	1.07279	2.75766
CAMKK2	0.00346372	0.00405951	2.0135	1.2492	3.24542
CAP1	0.0148725	0.0161283	1.79149	1.11415	2.88062
CAPN11	0.0218067	0.0231504	1.73411	1.0783	2.78878
CAPN5	0.00803322	0.00898925	1.88766	1.17197	3.04041
CAPRIN2	0.019785	0.0212904	1.7405	1.086	2.78944
CARD10	0.000128082	0.000200255	2.50273	1.54322	4.05884
CARD14	0.0458951	0.047898	0.614926	0.37984	0.99551
CARD16	0.000527001	0.000718089	0.418056	0.252213	0.692951
CARHSP1	0.00992385	0.0110355	0.541156	0.337032	0.868908
CARM1	0.000618121	0.000841397	2.29387	1.40898	3.73448
CARNS1	0.00917402	0.0102342	0.535816	0.332796	0.862686
CARTPT	0.0105878	0.0129091	2.29179	1.19191	4.40663
CASC1	0.000968838	0.00125604	0.453366	0.280358	0.733136
CASC10	0.00275408	0.00336449	2.07027	1.2729	3.36714
CASC5	0.000932954	0.00123523	2.24905	1.37546	3.67749
CASP1	0.00179762	0.0022226	0.463025	0.282705	0.758361
CASP2	0.0184195	0.0198347	1.75734	1.09355	2.82406
CASP4	0.00255043	0.00307277	0.483926	0.299282	0.782487
CASP8AP2	0.00148518	0.0018791	2.2122	1.34098	3.64946
CATSPER3	0.00291836	0.00353654	0.482639	0.295822	0.787436
CATSPERB	0.00418812	0.00485787	0.503855	0.312702	0.81186
CAV1	0.0117085	0.0128717	1.82803	1.13643	2.94052
CAV2	0.04171	0.0434411	1.62922	1.01448	2.61647
CBFB	3.99039e-05	7.38206e-05	2.70726	1.65443	4.43006
CBL	0.019176	0.0206947	1.7727	1.09143	2.87923
CBLN3	0.018059	0.0195082	0.567452	0.352728	0.912888
CBR3	0.0415918	0.043731	0.613972	0.382166	0.986379
CBR4	0.0188789	0.0203384	0.567133	0.351236	0.915737
CBX2	4.31988e-07	1.55935e-06	3.49218	2.09651	5.81698
CBX7	0.00362805	0.0042639	0.4944	0.304985	0.801452
CCAR2	0.00968084	0.010752	1.88145	1.15763	3.05785
CCBE1	0.00277055	0.00335032	2.04596	1.26819	3.30072
CCBL2	0.0453847	0.0474081	0.61236	0.377093	0.994407
CCDC113	0.0473144	0.0493947	1.61257	1.00127	2.59708
CCDC115	0.00839889	0.00940339	0.530256	0.328516	0.855884
CCDC121	0.0260685	0.0277164	0.586051	0.364176	0.943105
CCDC125	0.00573791	0.00655516	0.514714	0.318877	0.830823
CCDC137	0.0411765	0.0427598	1.62377	1.01594	2.59526
CCDC148	0.00711486	0.00802515	1.90021	1.18216	3.0544
CCDC15	0.0365007	0.0378407	1.65623	1.02874	2.66647
CCDC150	8.28251e-06	1.84765e-05	2.94734	1.79717	4.83361
CCDC151	0.0381512	0.0402738	1.64986	1.02246	2.66226
CCDC153	0.00526413	0.00606299	0.506565	0.311668	0.82334
CCDC158	0.0296406	0.0315438	1.70813	1.0485	2.78275
CCDC159	0.00260756	0.00313972	0.485733	0.300818	0.784316
CCDC160	0.0458661	0.0480336	0.617888	0.38338	0.995843
CCDC163P	0.0106953	0.0118146	0.539263	0.333433	0.872152
CCDC184	0.00135547	0.0017151	2.1598	1.33469	3.495
CCDC186	0.0234271	0.0248037	0.581845	0.362597	0.933662
CCDC28B	0.00308352	0.00365703	2.03918	1.26115	3.29721
CCDC34	0.0131035	0.0144585	1.8403	1.12877	3.00035
CCDC42	0.0297257	0.0313424	1.6988	1.04859	2.75221
CCDC6	0.0183245	0.0198473	0.56597	0.350571	0.913712
CCDC68	0.0465753	0.0485542	0.621803	0.387806	0.996988
CCDC77	0.0209073	0.0223638	1.73687	1.0815	2.78937
CCDC86	0.011979	0.0131341	1.83524	1.13581	2.9654
CCDC87	0.0021807	0.00272293	0.478214	0.29521	0.774664
CCDC88A	0.0257841	0.0275042	1.7204	1.06198	2.78702
CCDC88C	0.00190135	0.00232202	2.11281	1.30557	3.41915
CCDC89	0.0313367	0.0331692	0.595644	0.369777	0.959477
CCDC9	0.0199584	0.0214387	1.74745	1.08606	2.81161
CCDC92	0.0151023	0.0165533	1.79949	1.11295	2.90953
CCIN	0.0026718	0.00319891	2.07221	1.27659	3.36369
CCL16	0.0070313	0.00798724	1.92529	1.18655	3.12396
CCL26	0.000213847	0.000317121	2.47525	1.51138	4.05384
CCM2L	0.00321206	0.00377535	2.02321	1.25586	3.25941
CCNA1	0.01276	0.0140478	1.81298	1.12769	2.91472
CCNA2	2.89561e-05	5.50171e-05	2.769	1.68801	4.54225
CCNB1	1.05849e-05	2.20624e-05	2.89434	1.77151	4.72886
CCNB2	1.55162e-09	1.54665e-08	4.43015	2.64502	7.42008
CCND1	0.000385862	0.00054319	2.31054	1.43745	3.71393
CCND2	0.000117077	0.00018836	0.38652	0.234687	0.636585
CCND3	0.0410658	0.0431681	0.610904	0.378896	0.984975
CCNDBP1	0.0247638	0.0262948	0.580505	0.359294	0.937912
CCNE1	0.000185198	0.000287496	2.46369	1.51335	4.01081
CCNE2	4.88537e-05	8.77059e-05	2.69253	1.64139	4.41684
CCNF	3.24507e-07	1.20231e-06	3.53444	2.12312	5.8839
CCNG1	0.000759593	0.00102247	0.439732	0.26931	0.717999
CCNJL	0.000108466	0.000177063	2.60488	1.57926	4.29656
CCR1	0.00851806	0.00961254	0.517797	0.314635	0.852142
CCR2	0.000342327	0.000499221	0.416439	0.254303	0.681947
CCRN4L	0.0215243	0.0229738	1.73774	1.07927	2.79794
CCSAP	0.000178859	0.000268996	2.43483	1.50859	3.92976
CCSER1	0.00021947	0.000321102	0.408319	0.250655	0.665155
CCT2	0.000620884	0.000831781	2.26203	1.40151	3.6509
CCT4	0.043317	0.0449563	1.62104	1.01092	2.59937
CCT5	0.00708941	0.00800554	1.89872	1.18209	3.04979
CCT6A	0.000893377	0.00118473	2.25881	1.38031	3.69644
CD109	0.0137347	0.0150174	1.80652	1.12163	2.90962
CD200	0.0181943	0.0197299	0.567061	0.351978	0.913576
CD24	0.000767886	0.00101099	2.26625	1.39147	3.69098
CD276	3.74436e-06	9.5251e-06	3.18027	1.90565	5.30744
CD300LD	0.0245065	0.0260243	0.582199	0.361582	0.937426
CD34	0.00355779	0.00414284	2.0192	1.24898	3.2644
CD3EAP	1.78184e-05	3.39413e-05	2.8358	1.73238	4.64205
CD44	0.00278151	0.00334899	2.07799	1.27478	3.38731
CD70	0.0121839	0.0134315	1.82335	1.13252	2.93559
CDC20	7.50676e-08	3.31321e-07	3.75461	2.25922	6.2398
CDC25A	9.84655e-09	6.72768e-08	4.06903	2.44457	6.77298
CDC25C	0.000223209	0.000328982	2.41725	1.49322	3.91307
CDC42BPA	0.0391259	0.0409278	1.64208	1.02066	2.64183
CDC42EP2	0.0473919	0.0496051	0.615659	0.379353	0.999163
CDC42EP3	0.003616	0.00425828	2.01761	1.24684	3.26484
CDC42SE1	0.00313543	0.00371663	2.02499	1.25724	3.26157
CDC45	2.37828e-05	4.70272e-05	2.79696	1.70441	4.58983
CDC6	0.000592747	0.000789395	2.26308	1.40468	3.64602
CDCA2	3.91136e-08	2.06662e-07	3.87407	2.32375	6.45871
CDCA3	3.86057e-08	1.96303e-07	3.91102	2.33973	6.53752
CDCA4	9.41135e-06	1.99119e-05	2.90091	1.77837	4.73202
CDCA5	9.74139e-09	6.54974e-08	4.11288	2.46244	6.86952
CDCA7	3.97276e-05	7.35827e-05	2.73659	1.66363	4.50157
CDCA8	3.87944e-09	2.78789e-08	4.3725	2.59796	7.35916
CDH10	1.69264e-05	3.49713e-05	2.85082	1.73578	4.68215
CDH11	0.046794	0.0487425	1.61897	1.00266	2.61409
CDH13	0.00473031	0.00542125	1.9691	1.22143	3.17444
CDH18	0.00355101	0.00421152	2.05328	1.25449	3.36069
CDH2	0.000678467	0.00089989	2.25029	1.39412	3.63226
CDH5	0.009122	0.0102402	1.89428	1.16321	3.0848
CDH6	0.00145101	0.00180055	2.19298	1.33933	3.59072
CDHR3	0.0405559	0.0425599	1.64294	1.0168	2.65467
CDK1	1.77665e-06	5.01638e-06	3.19899	1.94153	5.27085
CDK15	0.0263795	0.028122	1.70288	1.05879	2.7388
CDK17	0.0136976	0.0149667	1.80753	1.12202	2.91188
CDK19	0.0172119	0.0187546	1.79731	1.10229	2.93058
CDK20	0.0350997	0.0371612	0.601108	0.372443	0.970163
CDK4	5.03912e-07	1.72575e-06	3.40434	2.06075	5.62394
CDK5R1	3.67216e-05	6.58861e-05	2.69083	1.65483	4.37541
CDK5R2	0.000536036	0.000748408	2.35259	1.43066	3.86863
CDK5RAP2	0.0149061	0.0163432	0.556182	0.344547	0.897812
CDK6	3.88182e-05	7.30003e-05	2.74586	1.66687	4.52327
CDKL5	0.0232888	0.0249933	1.7352	1.07168	2.80953
CDKN1A	0.0341902	0.0360345	1.65967	1.03355	2.66507
CDKN2A	1.4364e-07	5.95288e-07	0.261834	0.154726	0.443085
CDKN2B	0.000265548	0.000397166	0.414348	0.254468	0.674681
CDKN2C	0.00406868	0.00480823	1.98384	1.23227	3.19381
CDKN2D	0.00454447	0.00531097	1.96819	1.22265	3.16832
CDKN3	2.03011e-05	3.84881e-05	2.80031	1.71504	4.57233
CDNF	0.0112527	0.0124019	0.54272	0.336147	0.87624
CDR2L	0.00539831	0.00620162	1.96328	1.21108	3.18268
CDRT4	0.0156504	0.0169581	0.557977	0.345634	0.900774
CDT1	0.000169449	0.000263271	2.4926	1.52616	4.07104
CEBPG	0.0167384	0.017934	1.77142	1.10332	2.8441
CELF4	0.035292	0.0374229	1.65596	1.0298	2.66285
CELSR1	0.0222465	0.0238065	1.72975	1.07551	2.78195
CELSR3	2.0621e-05	4.21829e-05	2.87295	1.73369	4.76086
CEMIP	0.00717366	0.00811756	1.91236	1.1833	3.09062
CENPA	4.5789e-08	2.3682e-07	3.84501	2.30711	6.40805
CENPB	0.0281417	0.0296232	1.69233	1.05341	2.71877
CENPBD1	0.0331021	0.0353333	0.596373	0.368515	0.965119
CENPE	3.71197e-06	9.44946e-06	3.12953	1.88901	5.1847
CENPF	5.87124e-11	1.50079e-09	5.40606	3.12775	9.34396
CENPH	0.00473979	0.00558463	1.98296	1.2219	3.21804
CENPI	2.9788e-06	7.78818e-06	3.09804	1.88714	5.08593
CENPJ	0.00193454	0.00238626	2.10612	1.30241	3.40581
CENPK	9.5873e-08	4.40202e-07	3.73099	2.23832	6.21906
CENPL	5.7299e-06	1.33705e-05	3.01896	1.83589	4.96443
CENPM	7.17105e-06	1.56945e-05	2.93248	1.79965	4.77837
CENPN	1.02693e-06	3.12531e-06	3.35293	2.01627	5.57571
CENPO	1.98344e-05	3.9793e-05	2.81261	1.7174	4.60625
CENPQ	0.011463	0.012458	1.8471	1.14149	2.98886
CENPT	0.0311819	0.0330701	1.6759	1.04237	2.69449
CENPU	0.0241314	0.0257112	1.71323	1.06749	2.74959
CENPW	2.45896e-06	6.69634e-06	3.17094	1.91888	5.23995
CEP120	0.0325626	0.0343733	0.596453	0.369546	0.962684
CEP128	0.0355086	0.0373044	1.65318	1.03	2.65341
CEP152	0.0277516	0.02949	1.70798	1.05479	2.76567
CEP170	0.00707098	0.00803438	1.93727	1.18804	3.15898
CEP250	0.00060939	0.000827747	2.3462	1.42314	3.86799
CEP55	1.67943e-09	1.65288e-08	4.41978	2.63822	7.40441
CEP76	0.00384334	0.00446144	1.9962	1.2396	3.21459
CEP78	6.73391e-06	1.58696e-05	2.99829	1.82109	4.93648
CEP83	0.00103758	0.0013731	2.23954	1.36681	3.66953
CEP85	0.00486622	0.00560319	1.94956	1.21562	3.12663
CERCAM	0.000283211	0.000408592	2.40242	1.47764	3.90597
CERS1	0.0201617	0.0214282	1.74767	1.08612	2.81216
CFAP45	0.00234273	0.0028795	2.08253	1.28551	3.37371
CFAP46	0.0265626	0.0282998	0.583595	0.360651	0.944357
CFAP52	0.0212007	0.0227642	0.576464	0.358828	0.9261
CFAP70	0.00132939	0.00167024	0.464966	0.288436	0.749537
CFAP74	0.00171335	0.00213117	2.15758	1.32082	3.52441
CFB	0.000282007	0.000409509	0.418734	0.258379	0.678609
CFC1	0.0468907	0.0488504	0.617922	0.382755	0.997576
CFI	0.00764383	0.00858143	0.528909	0.328929	0.850473
CFL1	0.0196389	0.0209819	1.74068	1.08724	2.78684
CFTR	0.00622743	0.00706004	0.518298	0.321313	0.836048
CGA	0.00827279	0.00934846	1.95911	1.17982	3.25314
CGB2	0.00659857	0.00994903	3.16817	1.31826	7.61404
CGB5	0.0214074	0.0237005	1.96236	1.09418	3.51941
CGB7	0.000185326	0.000283538	2.52752	1.532	4.16994
CGB8	0.000622257	0.000897528	2.40273	1.43223	4.03088
CGN	0.015778	0.0171154	0.559389	0.346992	0.901794
CGNL1	0.0182254	0.0195525	0.566387	0.351452	0.912771
CGREF1	0.0288126	0.0303631	1.68698	1.05085	2.70821
CH507-396I9.6	0.0283702	0.0300203	1.70814	1.05315	2.77051
CH507-9B2.5	0.0251814	0.0266115	1.70523	1.06387	2.73325
CHAC1	0.0366572	0.038177	0.602932	0.373691	0.9728
CHAC2	0.0482826	0.0498765	1.60321	1.00025	2.56964
CHAD	0.033496	0.0352821	0.602466	0.375871	0.965666
CHAF1A	1.32153e-07	5.4992e-07	3.60934	2.18409	5.96466
CHAF1B	2.55905e-07	9.85563e-07	3.56815	2.14399	5.93834
CHD7	0.0214876	0.0230938	1.73521	1.0786	2.79152
CHEK1	9.90909e-06	2.11143e-05	2.92513	1.78367	4.79707
CHGA	0.00562026	0.00646401	1.98699	1.21222	3.25694
CHL1	0.0124943	0.0137109	0.54943	0.341265	0.884573
CHN1	0.00191682	0.00235686	2.11631	1.30541	3.4309
CHN2	0.0255027	0.0270661	0.578499	0.356084	0.939839
CHORDC1	0.00608032	0.00695601	1.93128	1.19747	3.11477
CHP1	0.033963	0.0354409	0.600336	0.373156	0.965827
CHPF2	0.015138	0.0163157	1.77951	1.11184	2.84812
CHPT1	0.0198358	0.0212152	1.74186	1.08643	2.7927
CHRM2	0.0323372	0.0343249	1.69476	1.03972	2.76247
CHRM4	0.0404463	0.0419293	1.63158	1.01803	2.61492
CHRM5	8.69013e-06	1.9269e-05	3.01559	1.81761	5.00315
CHRNA5	0.000594196	0.000797726	2.27229	1.40648	3.6711
CHRNA6	0.00502492	0.00590472	0.50913	0.314855	0.823278
CHRNA9	0.00542917	0.00622907	1.94478	1.20752	3.13218
CHST1	0.00388804	0.00454093	2.00031	1.23922	3.22883
CHST11	0.00878846	0.00992983	1.88011	1.16346	3.03818
CHST2	0.00986087	0.010908	1.85983	1.15345	2.99883
CHST3	0.018535	0.0199629	1.76132	1.0934	2.83725
CHST4	0.000707078	0.000946477	0.445722	0.276064	0.719645
CHST6	0.00119998	0.00153824	2.17724	1.34527	3.52374
CHSY1	1.81824e-06	5.76824e-06	3.37388	1.99464	5.70683
CHSY3	0.00384953	0.00450523	2.01016	1.24164	3.25438
CHTF18	0.000445064	0.000633146	2.34576	1.43844	3.82539
CIDEA	0.0447283	0.0463787	1.6286	1.00786	2.63167
CILP2	0.0207364	0.0224025	1.73933	1.08157	2.7971
CIRBP	0.0365154	0.0384198	0.602039	0.372391	0.973308
CISH	0.0304892	0.0323048	0.586703	0.360065	0.955996
CIT	6.59664e-07	2.46596e-06	3.52967	2.08858	5.96508
CKAP2	0.00900812	0.0100271	1.85281	1.15868	2.96277
CKAP2L	5.57856e-08	2.73317e-07	3.82322	2.29288	6.37495
CKAP4	0.00174036	0.00213071	2.12344	1.31324	3.43349
CKAP5	0.00610337	0.007007	1.971	1.20363	3.22761
CKLF-CMTM1	0.00926393	0.0104125	1.88654	1.16082	3.06598
CKMT1A	0.0363633	0.0381369	0.60455	0.375681	0.972846
CKMT2	1.63048e-05	3.42288e-05	0.34452	0.208112	0.570335
CKS2	0.00176418	0.00218674	2.09981	1.30636	3.37518
CLCF1	0.00217197	0.00266309	2.1293	1.30044	3.48645
CLCN4	0.0289287	0.0305331	1.68901	1.05045	2.71572
CLCNKB	0.0209425	0.0223986	0.574452	0.356961	0.924456
CLDN14	0.00496464	0.00577426	1.96809	1.21691	3.18295
CLDN15	0.000224582	0.000337417	0.405569	0.247613	0.664288
CLDN18	0.0225516	0.0243259	1.73036	1.07368	2.78867
CLDN4	0.0323724	0.0341896	1.68507	1.03966	2.73113
CLDN6	0.00180446	0.00225401	2.15225	1.31611	3.51962
CLEC11A	0.0223175	0.0239637	1.71774	1.07396	2.74745
CLEC12A	0.0115662	0.0128946	0.528008	0.319175	0.873479
CLEC14A	0.0214995	0.0228615	1.75003	1.08075	2.83378
CLEC4C	0.0424701	0.0448363	0.611884	0.378663	0.988746
CLHC1	0.0459053	0.0478233	0.617894	0.383559	0.995395
CLIC5	0.0151332	0.0163335	0.559898	0.348755	0.898873
CLIP2	0.00356258	0.00419695	2.0136	1.24703	3.25141
CLN5	0.0405087	0.0425704	0.610805	0.379295	0.983621
CLN8	0.0417621	0.043504	1.64179	1.01456	2.65679
CLSPN	0.0222711	0.023731	1.72598	1.07548	2.76994
CLYBL	0.0195625	0.020885	0.57372	0.358071	0.919243
CMPK1	0.0179665	0.0192975	1.76578	1.09668	2.84311
CMSS1	0.0208118	0.0222173	1.75254	1.08345	2.83481
CMTM3	0.000417698	0.000576747	2.33466	1.44068	3.78338
CMTM6	0.00719157	0.00815702	1.91332	1.1831	3.09425
CNFN	0.0411857	0.0431843	1.64246	1.01532	2.65696
CNIH2	3.82097e-06	9.64279e-06	3.07987	1.87132	5.06892
CNN1	0.000470364	0.000676607	2.37203	1.44148	3.9033
CNN2	4.32741e-05	7.65522e-05	2.6695	1.64098	4.34267
CNN3	0.000825211	0.00107675	2.23684	1.38054	3.62426
CNOT3	0.00113027	0.00143522	2.19482	1.35355	3.55897
CNPY4	0.00544424	0.00624626	1.96346	1.2106	3.1845
CNRIP1	0.0143349	0.0156465	1.8254	1.12054	2.97366
CNTF	0.0464426	0.0482732	1.60695	1.00361	2.57299
CNTNAP1	0.00726995	0.00816223	1.92242	1.18451	3.12002
COA4	0.0273869	0.0291796	0.588802	0.36581	0.947725
COBL	0.00980714	0.0108552	0.532431	0.327827	0.864732
COL11A1	0.00701612	0.0078927	1.92713	1.18772	3.12686
COL11A2	0.00128023	0.00164144	2.20638	1.34813	3.61102
COL12A1	5.16767e-05	8.82159e-05	2.70755	1.64567	4.45462
COL15A1	9.113e-05	0.000151386	2.6092	1.58871	4.28519
COL1A1	0.00137033	0.00171287	2.16277	1.33546	3.5026
COL1A2	0.0031488	0.00375298	2.01744	1.25509	3.24286
COL20A1	0.000972549	0.00128294	2.2365	1.37018	3.65057
COL23A1	0.00211035	0.00258008	2.07575	1.29094	3.33767
COL26A1	0.00257356	0.00316552	2.15766	1.29472	3.59577
COL28A1	0.0262867	0.0277478	0.587306	0.365616	0.943416
COL3A1	6.11459e-06	1.62908e-05	3.2375	1.89766	5.52334
COL4A1	5.07744e-05	9.11129e-05	2.71112	1.64512	4.46787
COL4A2	2.14544e-06	5.90154e-06	3.23129	1.94528	5.36747
COL5A1	4.30233e-08	2.86604e-07	4.12598	2.40134	7.08925
COL5A2	3.45502e-05	6.5173e-05	2.77369	1.68111	4.57636
COL6A1	0.00183868	0.00225655	2.14128	1.31363	3.4904
COL6A2	0.00210469	0.00255115	2.14758	1.30712	3.52844
COL6A3	0.00407239	0.00478313	1.9971	1.23512	3.22915
COL7A1	5.29611e-06	1.2361e-05	2.97344	1.82413	4.84689
COLGALT1	0.000210021	0.00031705	2.45881	1.50681	4.01231
COMP	0.0126703	0.013974	1.82253	1.12931	2.94127
COPS3	0.0221546	0.02371	1.74551	1.07717	2.82853
COPS7B	0.0100612	0.0110836	1.85165	1.15108	2.97862
COPS8	0.0146648	0.0159202	1.81353	1.11774	2.94245
COQ3	0.0182258	0.019666	1.75948	1.09448	2.82855
COQ7	0.00163292	0.00204504	0.470737	0.291604	0.759911
COQ9	0.0148891	0.0161835	0.55742	0.346188	0.897539
CORO1C	0.000108745	0.000175146	2.62487	1.58562	4.34526
COX18	0.0255528	0.0273141	0.582712	0.360713	0.94134
COX6A2	0.0231067	0.0247357	0.579511	0.359959	0.932977
COX6B2	0.0294359	0.0312477	1.67821	1.04772	2.68811
COX7C	0.0368371	0.0384987	0.605754	0.376804	0.973816
CPAMD8	0.00401225	0.0046806	0.502994	0.312425	0.809804
CPB2	0.0328719	0.0349634	1.72617	1.03928	2.86705
CPD	0.00104649	0.00137967	2.26599	1.37274	3.74046
CPEB3	0.00298711	0.00355489	0.489035	0.302325	0.791055
CPNE1	0.000240423	0.000356217	2.4686	1.50323	4.05392
CPNE7	4.03542e-05	7.28284e-05	2.64685	1.63631	4.28149
CPNE9	0.0372279	0.0390074	0.605526	0.37606	0.975006
CPO	0.0012155	0.0015596	0.456992	0.281315	0.742375
CPS1	1.39178e-05	2.86497e-05	2.97455	1.78504	4.95673
CPSF1	0.00646353	0.00729203	1.93369	1.19452	3.13025
CPSF3L	0.0237091	0.0251529	0.577843	0.357527	0.933923
CRABP2	0.017719	0.0191544	1.75964	1.09668	2.82338
CREB3L1	0.00557526	0.00637924	1.96347	1.20912	3.18845
CREB3L4	0.0283251	0.0299359	0.592032	0.368819	0.950334
CREB5	0.0112296	0.012277	1.84419	1.14224	2.97751
CREBL2	0.00660107	0.00753668	0.518047	0.319791	0.839215
CREBRF	0.000301098	0.000442592	0.421426	0.260234	0.682462
CRHBP	0.043928	0.0464919	0.613532	0.37929	0.992438
CRHR1	0.0366853	0.038291	0.604802	0.375844	0.973237
CRISP3	0.0074689	0.00860562	1.94069	1.18343	3.18249
CRMP1	0.0124556	0.0135936	1.82131	1.13132	2.93214
CRY1	0.0314146	0.0333709	1.71336	1.04334	2.81367
CRY2	0.011343	0.0125525	0.54598	0.33948	0.878089
CRYAB	0.00951049	0.0106797	1.88151	1.15815	3.05667
CRYBA2	0.000237941	0.000369157	2.4882	1.50662	4.10928
CRYGD	0.00163926	0.00249072	2.68478	1.41566	5.09163
CRYL1	0.000416729	0.000580883	0.426253	0.262235	0.692856
CRYM	0.0186234	0.0199308	1.77146	1.09453	2.86705
CSE1L	0.0114206	0.012493	1.83499	1.13966	2.95455
CSGALNACT2	0.00798779	0.00909433	1.93799	1.1788	3.18612
CSHL1	0.00171671	0.0135726	14.4723	1.73396	120.792
CSNK1E	0.00795798	0.0089825	1.88034	1.17089	3.01967
CSNK2A3	0.000727312	0.000962469	2.2414	1.38809	3.61929
CSPG4	1.77339e-06	5.62513e-06	3.40197	2.00529	5.77144
CSPG5	0.0156884	0.0170561	1.78462	1.10885	2.87224
CSPP1	0.0200375	0.0215336	1.76389	1.08718	2.86183
CSRNP2	0.00637568	0.00737414	1.98688	1.20245	3.28305
CSRP2	0.0264662	0.0281397	1.70643	1.05897	2.74975
CST3	0.0118095	0.0130601	0.54357	0.335896	0.879642
CTAG1B	0.0198835	0.0449954	8.20303	1.04808	64.2028
CTAGE8	0.00669192	0.00758347	0.513237	0.31454	0.837449
CTB-50L17.14	0.00991725	0.010983	0.534713	0.330061	0.866256
CTBP2	0.0100486	0.0110686	1.86292	1.15278	3.01054
CTD-2349B8.1	0.00852806	0.00976591	0.515018	0.311344	0.851931
CTD-2369P2.12	0.0104343	0.0115877	1.84863	1.14728	2.97873
CTD-2583A14.10	0.000313413	0.000456062	2.50381	1.49874	4.18288
CTDSP1	0.014007	0.0154593	0.547686	0.336429	0.8916
CTF1	0.00286731	0.00346331	0.486073	0.299673	0.788417
CTHRC1	0.0043619	0.00505193	1.96937	1.22624	3.16286
CTPS1	0.000243524	0.000359271	2.39387	1.48208	3.86658
CTRB2	0.00292916	0.00345306	2.0314	1.26327	3.2666
CTRC	0.0102901	0.0115807	1.86767	1.14996	3.03332
CTSB	0.0382915	0.0401056	1.6389	1.02256	2.62672
CTSF	0.0338066	0.0356982	0.598159	0.370298	0.966235
CTSO	0.0335652	0.0352911	0.59959	0.372404	0.96537
CTSZ	0.00171525	0.00213315	2.11505	1.31129	3.41148
CTTNBP2	0.000586363	0.000785428	0.438067	0.270589	0.709202
CTTNBP2NL	0.010741	0.0119548	1.86354	1.14692	3.02793
CUBN	0.0172932	0.0185837	1.76299	1.09951	2.82683
CWC15	0.0181031	0.0195973	0.566435	0.351445	0.912943
CX3CR1	0.0185283	0.0200089	0.565421	0.349727	0.914145
CXCL1	0.0254674	0.0271976	0.582734	0.360869	0.941003
CXCL6	0.000178244	0.000272803	0.395655	0.24015	0.651856
CXCR1	0.0109382	0.0120477	0.544789	0.339094	0.875259
CXCR2	0.00422819	0.00493992	0.501109	0.309531	0.811259
CXCR6	0.0161529	0.0175805	0.557309	0.343957	0.903001
CXorf36	0.00950445	0.0105972	1.87143	1.1573	3.02623
CXXC4	0.0279326	0.0294954	1.70879	1.05482	2.76821
CXXC5	0.0293044	0.0309138	1.68509	1.04909	2.70664
CYB561A3	0.0162511	0.0176618	0.561406	0.348467	0.904466
CYB5A	5.08933e-05	8.96615e-05	0.367667	0.222853	0.606583
CYB5D2	0.00170515	0.00214032	0.46964	0.289877	0.760879
CYB5R3	0.00679251	0.00765733	1.91718	1.18829	3.09319
CYBRD1	0.0367796	0.0389591	0.605511	0.376087	0.97489
CYP27A1	0.0224537	0.0241516	0.57646	0.357118	0.930522
CYP27B1	0.00050126	0.000692583	2.28269	1.41697	3.67734
CYP3A4	0.000700558	0.000941112	0.44066	0.271151	0.716139
CYP4B1	0.00127428	0.00164133	0.459451	0.283125	0.74559
CYP4F12	0.00150604	0.00187861	0.464506	0.286446	0.753252
CYP4F3	0.0141885	0.0154299	0.551613	0.340853	0.892692
CYP4X1	0.00955688	0.0106689	0.537269	0.333492	0.865559
CYP4Z1	0.0025528	0.00307376	0.486541	0.30197	0.783926
CYP51A1	0.0133099	0.0146265	1.83768	1.12751	2.99514
CYP7A1	0.00727471	0.00826423	0.523401	0.323727	0.846232
CYR61	0.0173605	0.0185732	1.76148	1.0994	2.82228
CYS1	0.00512722	0.00598089	0.505707	0.31101	0.822289
CYSLTR2	0.00561738	0.00649804	0.517143	0.321634	0.831495
CYSTM1	0.00215395	0.00262583	0.478645	0.296174	0.773536
CYTH2	0.00283376	0.00339095	2.03881	1.26595	3.28351
CYTH3	0.0315541	0.0333924	1.67809	1.04157	2.7036
CYYR1	0.0382997	0.0399558	1.6459	1.02312	2.64775
D2HGDH	0.0309133	0.0325289	0.595583	0.370349	0.957797
DACH1	0.0273271	0.0289094	1.71432	1.05702	2.78037
DACT1	0.000175155	0.00026351	2.51758	1.53317	4.13404
DACT3	0.0221232	0.0237669	1.72917	1.07561	2.77983
DAG1	0.035767	0.037189	1.66417	1.0307	2.68695
DAK	0.0241599	0.0256403	0.578209	0.35738	0.935489
DAND5	0.0165905	0.0181685	1.78186	1.10336	2.8776
DBH	0.0224134	0.0240384	1.74135	1.07562	2.81912
DBN1	0.000489863	0.000668796	2.32834	1.43083	3.78884
DBP	0.00802045	0.00910959	0.52179	0.320023	0.850766
DCAF11	0.000783014	0.00106302	0.433588	0.262887	0.715132
DCAF15	0.0264612	0.0280337	1.6962	1.05862	2.71779
DCAF17	0.033438	0.0348278	1.67049	1.03724	2.69033
DCAF6	0.0218754	0.0235512	0.574472	0.35555	0.928191
DCAF8L2	0.0140239	0.0160858	2.05381	1.143	3.6904
DCANP1	0.0286325	0.0362873	0.332355	0.118512	0.932059
DCBLD1	0.00495199	0.00573473	1.96501	1.21683	3.1732
DCBLD2	0.00739645	0.00833956	1.91962	1.18248	3.11627
DCDC2	0.0024631	0.00300112	2.06839	1.27989	3.34265
DCHS1	0.043914	0.0459244	1.6258	1.00883	2.62009
DCLK3	0.0144346	0.0155631	1.81735	1.12004	2.9488
DCLRE1B	0.0232345	0.0246772	1.72024	1.07162	2.76144
DCPS	0.00145101	0.00179972	2.14439	1.32824	3.46204
DCST2	0.037073	0.0391355	1.6794	1.02617	2.74845
DCTN2	0.0224602	0.0239352	1.71972	1.07422	2.7531
DDAH1	0.0434882	0.0451235	1.62446	1.0106	2.61119
DDAH2	0.00739205	0.00834594	1.92728	1.18363	3.13813
DDIAS	2.6353e-05	5.02044e-05	2.77505	1.69434	4.54508
DDIT3	0.00406039	0.00473661	2.0087	1.23798	3.25926
DDIT4	6.03371e-05	0.000108665	2.69962	1.63264	4.46391
DDN	0.000371033	0.000519606	2.36208	1.45369	3.8381
DDR1	0.00372577	0.00443232	0.496553	0.306591	0.804217
DDX21	0.0038239	0.00453177	2.02829	1.2447	3.30518
DDX26B	0.0146694	0.0160105	0.554069	0.342688	0.895836
DDX39A	0.0426468	0.0445527	1.623	1.01186	2.60326
DDX47	0.0220874	0.023804	1.7345	1.07592	2.79623
DECR1	0.0335308	0.0353386	0.600653	0.373635	0.965607
DECR2	0.0261379	0.0275526	0.585103	0.363245	0.942464
DEFB124	0.038254	0.0401011	1.65354	1.02298	2.67277
DEGS1	0.000645057	0.00085505	2.26892	1.40173	3.67261
DEGS2	0.0013763	0.00175399	0.465338	0.288179	0.751404
DENND2A	0.0451601	0.0465871	1.62337	1.00735	2.61611
DENND3	0.0256301	0.0273072	0.581793	0.359647	0.941154
DENND5A	0.00382041	0.00451286	2.0299	1.24529	3.30888
DENR	0.0168376	0.0181782	1.76861	1.10191	2.83869
DEPDC1	1.86187e-08	1.05646e-07	4.06332	2.42339	6.81301
DEPDC1B	1.23012e-06	3.67005e-06	3.26434	1.97816	5.38678
DEPDC7	0.0012362	0.00155787	2.1896	1.34742	3.55818
DESI2	3.50135e-05	6.5416e-05	2.77705	1.68196	4.58512
DGCR6	0.0362818	0.0378023	1.64517	1.02845	2.63172
DGKG	0.0147037	0.0159355	1.79174	1.11514	2.87887
DGKH	0.0332806	0.0351667	1.69139	1.03722	2.75815
DGKI	0.00727299	0.00820158	1.91308	1.18266	3.0946
DGKZ	0.00154114	0.00192114	2.12262	1.31933	3.41502
DHH	0.0129022	0.014043	1.80446	1.12665	2.89005
DHODH	0.00168232	0.00210417	0.466576	0.287016	0.75847
DHRS1	0.00444071	0.00526116	0.498256	0.305464	0.812729
DHRS12	0.00288049	0.00344403	0.481848	0.29542	0.785923
DHRS7	0.0421791	0.0442307	0.609326	0.376056	0.987293
DHX33	0.0390423	0.0409257	1.63173	1.0204	2.60933
DHX34	0.0130813	0.0143477	1.82301	1.12727	2.94816
DHX57	0.0288185	0.0303501	1.68667	1.05087	2.70716
DIAPH3	0.00153564	0.00192195	2.13402	1.32191	3.44506
DIMT1	0.0045845	0.00534787	1.96762	1.22208	3.16798
DIP2B	0.00800044	0.00897819	1.89399	1.17304	3.05805
DIRAS2	0.027039	0.0286684	1.69731	1.05669	2.7263
DIXDC1	0.00568659	0.00649498	1.97429	1.2097	3.22215
DKC1	0.000580683	0.000780909	2.27489	1.40833	3.67466
DKFZp434P228	0.0148398	0.0163555	1.81676	1.11589	2.95785
DKK1	0.00151686	0.00190935	2.13316	1.32211	3.44177
DLC1	0.000207124	0.000328719	2.5261	1.52345	4.18865
DLEC1	0.00410207	0.00486511	0.498801	0.307375	0.809441
DLG2	0.00997535	0.0110819	0.543566	0.339603	0.870029
DLG4	0.0282646	0.0299261	1.69073	1.05239	2.71627
DLGAP4	0.00893418	0.00992353	1.87663	1.16299	3.02818
DLGAP5	2.48723e-06	6.6207e-06	3.17417	1.9205	5.24622
DLK2	0.04277	0.0444083	1.63076	1.0123	2.62705
DLL4	0.0013437	0.00168234	2.16148	1.33624	3.49636
DLX1	2.52435e-06	6.71256e-06	3.20355	1.92989	5.31778
DLX2	0.00903796	0.00995653	1.86784	1.16144	3.00388
DLX5	0.0141646	0.015471	1.81859	1.12067	2.95118
DMBT1	0.015019	0.0162199	0.557869	0.346638	0.897819
DMBX1	5.78745e-05	0.000107263	2.7349	1.64382	4.55018
DMD	0.0356457	0.0374378	1.66223	1.02999	2.68258
DMPK	9.16169e-06	2.08282e-05	3.0257	1.81714	5.03807
DMRTA1	0.0206822	0.022363	0.575571	0.3583	0.924595
DMRTB1	0.0440238	0.0497729	2.26674	1.00081	5.13395
DMRTC1B	0.0451593	0.0468356	0.621656	0.389036	0.993369
DNA2	0.0115574	0.0126904	1.8298	1.13776	2.94277
DNAH14	0.00408951	0.00485532	2.03237	1.2407	3.3292
DNAH6	0.00191345	0.00235019	0.477234	0.296303	0.768645
DNAH9	0.000136033	0.00021275	0.402488	0.248641	0.651527
DNAI2	0.0144438	0.0156318	1.80117	1.11778	2.90237
DNAJB4	0.0109592	0.0120392	1.83518	1.14252	2.94778
DNAJB6	0.00620733	0.00712325	1.9489	1.19874	3.16848
DNAJB9	0.00108069	0.0014054	0.456613	0.28223	0.738742
DNAJC10	0.0299265	0.0316273	1.68255	1.04685	2.70426
DNAJC19	0.0110181	0.0120712	0.54796	0.342572	0.876487
DNAJC2	0.000432029	0.000616923	2.35655	1.44272	3.8492
DNAJC21	0.0305213	0.0322192	1.67229	1.04459	2.67717
DNAJC30	0.00241981	0.00293915	0.483693	0.299704	0.780632
DNAJC4	0.0235837	0.0251463	0.578732	0.358566	0.934082
DNAJC9	0.00458114	0.0052852	1.96878	1.22309	3.16909
DNASE1L2	0.0104098	0.0114977	1.85298	1.14848	2.98962
DNER	0.0194942	0.021052	1.74483	1.08735	2.79986
DNLZ	0.00248603	0.00301052	2.05433	1.27674	3.30553
DNM1	0.00300398	0.00359606	2.04147	1.2627	3.30054
DNMT1	0.000991965	0.00128269	2.18617	1.35804	3.51928
DNMT3A	0.00392028	0.00458733	2.00666	1.23975	3.24797
DNMT3B	2.99121e-06	8.05528e-06	3.20466	1.92176	5.34399
DOC2A	0.0241704	0.0255083	0.581765	0.361674	0.935789
DOCK4	0.00290686	0.00346449	0.488316	0.301981	0.789628
DOCK6	0.00129124	0.00169006	2.21179	1.34757	3.63025
DOCK7	0.00204102	0.00251244	2.12479	1.30322	3.46428
DONSON	3.53433e-07	1.2985e-06	3.46471	2.09473	5.73068
DOT1L	0.00110992	0.00142532	2.1692	1.34785	3.49107
DPCD	0.0398027	0.0418693	0.609779	0.378658	0.981968
DPCR1	0.00691584	0.00784912	0.52101	0.322175	0.842559
DPF1	1.09409e-07	5.39185e-07	3.86762	2.27884	6.5641
DPH2	0.00197303	0.00240994	2.08105	1.29629	3.34091
DPH6	0.000808773	0.00107684	0.440954	0.269916	0.720376
DPP4	0.0175974	0.0190728	0.563183	0.348467	0.910202
DPP9	0.0260378	0.0275749	1.7009	1.06041	2.72825
DPYD	0.00331323	0.00390701	0.486946	0.298681	0.793876
DPYS	0.00737042	0.00833315	0.523392	0.323552	0.846662
DPYSL3	0.00232565	0.00284293	2.07838	1.28544	3.36045
DRD5	9.48047e-05	0.000154586	0.381473	0.231555	0.628453
DSC1	0.0353403	0.037137	1.67314	1.03117	2.71477
DSC2	0.00306612	0.00372627	2.1008	1.27214	3.46924
DSC3	0.00752824	0.00853121	1.90348	1.17826	3.07506
DSCAM	0.0385812	0.0401669	1.63591	1.02233	2.61775
DSCAML1	0.0217678	0.023287	0.572894	0.354055	0.926997
DSCC1	0.00190944	0.00235297	2.13337	1.30925	3.47624
DSG2	0.00443455	0.00512978	2.01052	1.23283	3.27878
DSN1	0.000132757	0.000205734	2.49066	1.53833	4.03254
DST	0.00135584	0.00173964	2.19609	1.34218	3.59326
DSTN	0.0354583	0.0371907	1.65053	1.0302	2.64441
DTD1	0.000801503	0.00106086	2.21854	1.37685	3.57476
DTL	9.51656e-06	2.10147e-05	2.91081	1.77917	4.76222
DTNB	0.0343619	0.0360859	1.65139	1.03308	2.63977
DTWD2	0.0395854	0.0415507	0.603708	0.371574	0.980863
DTYMK	0.0246322	0.0260832	1.71082	1.06605	2.74557
DUOXA2	0.0462443	0.0484259	1.61549	1.00332	2.60115
DUPD1	0.0314906	0.0335763	0.576225	0.346569	0.958062
DUSP12	0.0139192	0.0150726	1.80207	1.1208	2.89746
DUSP2	0.0199859	0.0212381	1.73837	1.08601	2.78261
DUSP22	0.00698754	0.00802897	0.524972	0.325997	0.845395
DUSP7	7.48932e-05	0.000127396	2.64049	1.60684	4.33906
DUT	0.00147381	0.00182382	2.13519	1.32532	3.43995
DYNC2LI1	0.0145129	0.0158214	0.556252	0.345437	0.895725
DYNLT3	0.0196046	0.021055	1.76157	1.0889	2.84977
DYRK2	0.00208853	0.00251836	2.0954	1.29671	3.38602
DYRK3	0.00960365	0.0108509	1.88545	1.15749	3.07124
DZIP1	0.0154228	0.0166505	1.78354	1.11067	2.86403
DZIP1L	0.000237156	0.000351131	2.48131	1.50751	4.08416
E2F1	2.86434e-08	1.61299e-07	3.91902	2.3511	6.53256
E2F2	0.0274248	0.0289888	1.68649	1.05499	2.69597
E2F3	0.00484897	0.00563442	1.9824	1.22119	3.21812
E2F7	2.04947e-06	5.64065e-06	3.19395	1.93454	5.27326
E2F8	0.000993697	0.00128795	2.2084	1.36318	3.57766
E4F1	0.0155976	0.017025	1.79178	1.10979	2.89288
EAPP	0.0422138	0.0444685	0.613406	0.380841	0.98799
EBAG9	0.0299701	0.0318826	0.595414	0.370806	0.956072
EBLN1	0.00617427	0.0070474	0.507953	0.310348	0.831377
EBP	0.0195034	0.0208579	1.75098	1.08871	2.81611
ECE1	5.39247e-05	9.69504e-05	2.699	1.6383	4.44644
ECE2	0.0433076	0.0454535	1.62412	1.00986	2.61201
ECM1	0.0433621	0.0451391	1.61602	1.01045	2.5845
ECSCR	0.00187075	0.00230361	2.12679	1.30914	3.45511
ECSIT	0.0110771	0.0121479	0.540042	0.333664	0.874071
ECT2	0.00894683	0.0100593	1.89414	1.16455	3.08079
EDA	0.00659298	0.00744193	0.520486	0.32265	0.839628
EDC3	0.0317129	0.0334521	1.66828	1.04092	2.67375
EDEM2	0.00811827	0.00916876	0.525877	0.324293	0.852768
EDIL3	0.0214542	0.0229229	1.73491	1.07922	2.78897
EDN1	0.0119783	0.0131363	1.83404	1.13564	2.96197
EDNRA	0.0346885	0.0365602	1.67391	1.03272	2.71318
EDNRB	0.00276945	0.00333311	2.04512	1.26835	3.2976
EEF1B2	0.00922303	0.0103311	0.532867	0.329372	0.862088
EFCAB5	0.0161335	0.0174228	1.78817	1.1075	2.88719
EFCAB7	0.020007	0.0215773	0.5716	0.354725	0.92107
EFEMP2	0.00613286	0.00698595	1.92157	1.19552	3.08857
EFHC1	0.0467558	0.0488674	0.619531	0.384732	0.997625
EFNA3	0.00479361	0.0055439	1.99384	1.22437	3.24687
EFNA4	0.021342	0.0228084	1.7458	1.08059	2.82051
EFNA5	0.0084095	0.00939191	0.529291	0.327493	0.855435
EFNB1	0.0143023	0.0155103	1.79866	1.11811	2.89343
EFNB3	0.0313766	0.0329905	0.598129	0.372924	0.959334
EGFL7	0.000729893	0.00096517	2.24619	1.38913	3.63203
EGFLAM	0.0280521	0.0295858	1.68665	1.05318	2.70116
EHD2	0.0152121	0.0164692	1.7956	1.11293	2.89703
EIF1AY	0.0138159	0.0151365	0.555684	0.345889	0.892726
EIF1B	0.000390657	0.000556255	0.419567	0.256238	0.687005
EIF2AK3	0.0135784	0.0147179	1.83427	1.12659	2.98647
EIF2D	0.00128295	0.00164799	0.45474	0.278378	0.742832
EIF2S1	0.0410233	0.042693	1.63142	1.01625	2.61898
EIF3B	0.00401238	0.004673	1.98386	1.23417	3.18895
EIF4A2	0.0448885	0.0468406	0.613293	0.378706	0.993192
EIF4EBP1	0.00545993	0.00626758	1.93656	1.20565	3.11057
EIF4EBP3	0.00060945	0.00083812	0.435919	0.267791	0.709602
ELAVL4	0.0113169	0.0125277	1.84355	1.14059	2.97975
ELK3	0.000720277	0.000975624	2.29702	1.40118	3.7656
ELMO3	0.0377166	0.039471	0.604855	0.374826	0.976052
ELMOD1	0.0337175	0.0354924	1.67816	1.03577	2.71896
ELOVL5	0.016492	0.0177783	1.77346	1.10425	2.84823
ELP4	0.000183943	0.000276457	2.51374	1.52952	4.13129
ELTD1	0.000436751	0.000611283	2.38242	1.45	3.91444
EMB	0.000533199	0.000737337	0.424009	0.257632	0.697831
EMCN	0.0232088	0.0245361	1.73043	1.07293	2.79086
EME1	3.40684e-07	1.23413e-06	3.50238	2.11048	5.81226
EMILIN1	0.0205746	0.0222662	1.73114	1.08137	2.77135
EML1	0.00280591	0.00342257	0.485928	0.299706	0.787859
EMP2	0.00144289	0.00186625	2.23592	1.34672	3.71225
EMP3	0.0058646	0.00669163	1.91994	1.19823	3.07633
ENAH	0.00171769	0.00213381	2.17144	1.32381	3.5618
ENC1	0.00535481	0.00614831	1.95416	1.21008	3.15579
ENDOU	0.0125072	0.0138344	0.548695	0.340234	0.884882
ENG	0.0139814	0.0151855	1.80059	1.12003	2.89469
ENO4	0.00352494	0.00419775	0.495914	0.306817	0.801555
ENOX1	0.0174017	0.0189419	1.7731	1.09898	2.86073
ENPEP	0.000678459	0.000918531	2.30247	1.40607	3.77032
ENPP1	0.000222931	0.000345843	2.54815	1.52658	4.25333
ENTPD4	0.0241128	0.025793	1.72995	1.06846	2.80097
ENTPD7	0.0189106	0.020414	1.74869	1.0903	2.80464
EOGT	0.00510547	0.00587405	1.97649	1.21722	3.20939
EP400	0.0230936	0.0247955	1.73202	1.07213	2.79808
EP400NL	0.00176004	0.00221026	2.11891	1.30997	3.42737
EPB41L4A	0.0291593	0.0307515	0.591444	0.367263	0.952469
EPHB4	0.00136322	0.00173574	2.21787	1.34728	3.65101
EPHB6	0.0142826	0.0154807	0.554921	0.344479	0.893921
EPHX1	0.000931682	0.00122793	0.451089	0.278368	0.730981
EPHX2	0.000332354	0.000483548	0.421321	0.259286	0.684614
EPHX4	0.00236242	0.00285041	2.06602	1.28265	3.32785
EPN1	0.00534576	0.00618985	1.9425	1.20756	3.12475
EPO	0.0223111	0.0240925	1.72604	1.07417	2.77349
EPOR	0.00354043	0.00426131	2.02924	1.24905	3.29675
ERAL1	0.0249737	0.026578	1.71694	1.06483	2.76842
ERAP1	0.00804304	0.00907685	0.519526	0.317669	0.84965
ERBB2IP	0.0273561	0.0289907	1.70063	1.05589	2.73907
ERBB3	0.046194	0.0483905	0.616092	0.380872	0.996581
ERCC2	0.0220397	0.0234519	1.7301	1.07684	2.77965
ERCC5	0.004748	0.00552178	0.495886	0.302151	0.81384
ERCC6L	5.29795e-08	2.62643e-07	3.82935	2.29686	6.38432
ERF	0.000274292	0.000396162	2.39926	1.47842	3.89365
ERI1	0.0407154	0.0424217	1.64746	1.01722	2.66817
ERICH3	0.00194287	0.00241419	0.474631	0.293275	0.768134
ERMN	0.0322457	0.03405	1.66423	1.03908	2.66549
ERO1L	0.0344396	0.0360858	1.65758	1.03333	2.65894
ERO1LB	0.00513369	0.00598898	0.508701	0.314146	0.823747
ESAM	0.00279974	0.00335643	2.08598	1.27625	3.40944
ESCO2	0.000380163	0.000541123	2.37195	1.45409	3.86917
ESF1	0.0147822	0.016031	1.79338	1.11485	2.88489
ESPL1	1.20789e-05	2.56612e-05	2.93704	1.77835	4.85068
ESPNL	0.0365151	0.0384349	0.603894	0.374613	0.973504
ESRRA	0.0261547	0.0277539	0.584145	0.361898	0.942877
ETFA	0.0449482	0.0469265	1.61047	1.0065	2.57687
ETS1	0.0014152	0.00177406	2.15312	1.33112	3.48273
ETS2	0.0145658	0.0159459	1.80512	1.11664	2.91808
ETV4	0.00796432	0.0089766	1.88721	1.172	3.03889
ETV6	0.0272738	0.0287591	1.6902	1.05595	2.70541
EVA1B	0.00337436	0.00399586	2.01358	1.25025	3.24295
EVA1C	0.000113786	0.000186801	0.391581	0.239454	0.640355
EVPLL	0.0191357	0.0205524	0.567505	0.351375	0.916576
EXO1	5.71051e-05	9.93647e-05	2.66094	1.62555	4.35582
EXO5	0.0211385	0.0223958	1.74124	1.08177	2.80273
EXOC3L2	0.00545067	0.00616726	1.95652	1.21028	3.16289
EXOSC7	0.00725351	0.00816988	1.89506	1.18005	3.0433
EXT2	0.000137239	0.000204449	2.5382	1.55245	4.14987
EYA3	0.0407962	0.0427296	1.63382	1.01621	2.62679
EZH2	7.10268e-06	1.64053e-05	2.98052	1.81365	4.89811
F12	8.62063e-06	1.95827e-05	2.99437	1.80991	4.95399
F2	0.0030498	0.00358015	2.08441	1.27162	3.41671
F2R	0.00530094	0.00618253	1.97269	1.21294	3.20831
F2RL3	0.00586296	0.00671263	1.95887	1.2047	3.18517
F8A1	0.0199917	0.021309	1.74584	1.08642	2.80549
F8A3	0.0337526	0.0359206	0.589555	0.359856	0.965872
FA2H	0.0436367	0.0455029	1.6347	1.00988	2.64609
FAAH2	6.59597e-05	0.000115709	0.381513	0.233745	0.622696
FABP2	0.0470997	0.0492336	0.617492	0.381913	0.998383
FABP3	0.00298965	0.0035668	2.04866	1.26469	3.31859
FADS1	0.00199115	0.00242996	2.11286	1.30275	3.42672
FADS2	0.00104868	0.00136048	2.23176	1.36552	3.64752
FADS3	0.0021127	0.00256645	2.09329	1.29508	3.38349
FAF1	0.000125899	0.000198357	2.54028	1.55462	4.15087
FAIM3	0.0247925	0.0266831	0.584242	0.363216	0.939768
FAM101B	0.00162182	0.00203316	2.13503	1.31871	3.45666
FAM110D	0.0265511	0.0281185	1.69924	1.05856	2.7277
FAM111B	0.000296007	0.000428505	2.44224	1.48587	4.01417
FAM117A	0.0167544	0.0180263	0.564426	0.351367	0.906677
FAM120B	0.0335711	0.0353833	1.68298	1.03627	2.7333
FAM120C	0.0122393	0.0135853	0.549014	0.341018	0.883873
FAM126A	0.00502588	0.00584853	1.9965	1.22107	3.26437
FAM129A	0.00356274	0.00422464	2.03906	1.25153	3.32214
FAM131A	0.0395275	0.0415126	1.64046	1.01922	2.64035
FAM131C	0.0270383	0.0287825	1.69845	1.05641	2.73071
FAM132B	0.00109873	0.00139694	2.19081	1.35419	3.54428
FAM134B	0.00987217	0.0110327	0.534874	0.330139	0.866575
FAM13B	0.0180785	0.0195799	0.565144	0.349996	0.912547
FAM149A	0.0382461	0.0402128	0.60862	0.378721	0.978075
FAM153A	0.0133468	0.0145685	0.555868	0.347027	0.890391
FAM153B	0.0112288	0.0123496	0.545285	0.339082	0.876884
FAM160B2	0.000948492	0.00126654	2.25373	1.37507	3.69383
FAM161A	0.0201375	0.021554	1.75334	1.08614	2.83041
FAM163A	0.00349367	0.00413479	2.03095	1.2514	3.2961
FAM167A	0.0100722	0.0113306	0.537065	0.331951	0.868919
FAM167B	0.000875769	0.00112698	2.22744	1.3756	3.60681
FAM169A	0.00392282	0.00460913	1.9826	1.23484	3.18318
FAM171A2	0.00321372	0.00378052	2.05498	1.26211	3.34591
FAM182B	0.0466811	0.0485653	1.61874	1.00304	2.61237
FAM188B	0.00940363	0.0105673	0.53108	0.326939	0.862686
FAM189A1	0.00177384	0.00219895	2.10677	1.30758	3.39442
FAM195A	0.015147	0.0164375	0.561571	0.35049	0.899776
FAM198A	0.0463804	0.0481048	0.621338	0.387596	0.996041
FAM198B	0.0139036	0.0151726	1.80844	1.12104	2.91735
FAM207A	0.00833033	0.00927807	1.87922	1.16835	3.02259
FAM210B	0.00174897	0.00220624	0.469577	0.289399	0.761931
FAM216A	0.0027847	0.00333569	2.03514	1.26624	3.27094
FAM218A	0.0322723	0.0338802	1.66923	1.03978	2.67972
FAM219A	0.0406859	0.043093	1.62943	1.01528	2.61508
FAM220A	0.0360863	0.0376264	1.65629	1.02929	2.66524
FAM221A	0.000775411	0.00103857	0.443432	0.27276	0.720899
FAM222A	2.46321e-05	4.52675e-05	2.78275	1.70174	4.55046
FAM222B	0.0167039	0.0181158	1.77642	1.10302	2.86092
FAM227B	0.0144552	0.0158471	0.552704	0.341414	0.894755
FAM231D	0.0205675	0.0227977	0.513031	0.288818	0.911304
FAM43B	0.00672624	0.0076004	1.94664	1.19365	3.17465
FAM46C	0.0126973	0.0140556	0.550832	0.34224	0.886558
FAM57A	1.71007e-08	1.12534e-07	4.0972	2.43338	6.89865
FAM57B	0.0474861	0.0498152	1.62553	1.00039	2.6413
FAM60A	0.0400298	0.0419981	1.65478	1.01839	2.68884
FAM63A	0.0152818	0.0166708	0.558181	0.346299	0.899704
FAM64A	2.45096e-06	6.46139e-06	3.16335	1.9179	5.21757
FAM69B	0.0166752	0.0182055	1.81083	1.10622	2.96425
FAM71B	0.000535788	0.00423161	8.77663	1.98127	38.8787
FAM72A	0.0414665	0.0429927	1.6239	1.01541	2.59706
FAM72B	0.0165539	0.0178079	1.77455	1.10423	2.8518
FAM72C	0.000274043	0.000407014	2.40843	1.47949	3.92063
FAM72D	0.000124037	0.000199577	2.50474	1.54398	4.06336
FAM83D	4.84651e-05	8.32081e-05	2.65369	1.63205	4.31483
FAM83E	0.0402303	0.0418884	0.610166	0.379114	0.982035
FAM89A	0.0402268	0.0420757	1.64511	1.01799	2.65855
FAM8A1	0.00540908	0.006254	0.514945	0.319992	0.828673
FAM90A1	0.0391366	0.0409819	0.606039	0.374899	0.979686
FAM92A1	0.00467186	0.00539772	1.9712	1.22211	3.17944
FAM9B	0.00760458	0.00855763	1.92649	1.18165	3.14084
FANCA	0.0128812	0.0141456	1.80874	1.12662	2.90387
FANCB	4.43639e-06	9.97757e-06	3.05167	1.86022	5.00623
FANCD2	0.00111504	0.00144659	2.23139	1.36171	3.65652
FANCF	0.00935167	0.0103682	0.534214	0.330765	0.862801
FANCG	0.00107365	0.00139145	2.21493	1.36017	3.60684
FANCI	1.54966e-06	4.64293e-06	3.40023	2.01405	5.74046
FANK1	0.00706803	0.00800971	0.525785	0.326923	0.845613
FAP	0.00411074	0.00478475	1.98358	1.23254	3.19225
FAR1	0.0137532	0.0150139	1.82557	1.12393	2.96523
FARP2	2.26867e-05	4.38293e-05	2.87469	1.73234	4.77036
FARSB	0.020419	0.0218718	1.74355	1.084	2.8044
FASN	0.000195595	0.00029898	2.50576	1.52305	4.12253
FAT1	0.000123643	0.00020767	2.70439	1.59875	4.57467
FAT3	0.00571885	0.00650845	1.97512	1.20969	3.22487
FAT4	0.0326247	0.0345189	1.67367	1.03823	2.69802
FAXDC2	0.00900714	0.0100569	0.533909	0.331084	0.860988
FBL	0.0148762	0.0161633	1.79398	1.11426	2.88836
FBLN7	0.0420041	0.0436865	1.62875	1.01391	2.61644
FBN1	0.000106562	0.00016836	2.54699	1.56498	4.14521
FBN2	0.00191788	0.00234933	2.11377	1.30506	3.42362
FBXL19	0.00907883	0.010059	1.86037	1.15957	2.98471
FBXL6	0.0421962	0.0438148	1.62517	1.01356	2.60584
FBXL8	0.0263955	0.027774	0.583354	0.360949	0.942796
FBXO10	0.00704546	0.00802504	1.89979	1.18209	3.05323
FBXO15	0.029152	0.0310221	0.593436	0.369343	0.953495
FBXO16	0.0318256	0.0334816	0.599268	0.373796	0.960744
FBXO17	0.0200774	0.021734	1.76772	1.08672	2.87547
FBXO2	0.00292167	0.00351242	0.483034	0.296332	0.787366
FBXO30	0.00247857	0.00299441	2.11635	1.29004	3.47195
FBXO32	0.00744917	0.00847065	1.9158	1.18073	3.1085
FBXO33	0.0192922	0.0209909	0.567378	0.35065	0.918061
FBXO43	0.00749038	0.00843958	1.91555	1.18096	3.10708
FBXO44	0.000199341	0.000304107	0.403168	0.246263	0.660044
FBXO46	0.00360224	0.00421632	2.01958	1.24789	3.2685
FBXO5	3.17556e-05	5.94951e-05	2.75789	1.68072	4.52544
FBXW11	0.0038028	0.00450345	0.498157	0.308	0.805714
FBXW8	0.0319862	0.0337065	1.67663	1.04062	2.70137
FCN1	0.0423413	0.0443983	0.610506	0.377352	0.987717
FCRLB	0.00954704	0.0106547	1.87898	1.15797	3.04892
FDFT1	0.0335489	0.0350921	1.66098	1.03611	2.6627
FDPS	0.0210413	0.0223232	1.73464	1.08146	2.78234
FEN1	0.00350333	0.004101	1.99814	1.2455	3.20559
FER1L6	0.0283719	0.0300663	1.7116	1.05321	2.78156
FERD3L	0.00346683	0.0075294	4.33469	1.4785	12.7086
FETUB	0.00654118	0.00751664	1.97956	1.19982	3.26604
FGD1	0.0228671	0.0244965	1.73927	1.07378	2.81722
FGD5	0.0159229	0.0172572	1.79262	1.10877	2.89826
FGF12	0.00808007	0.00898147	1.89971	1.1739	3.0743
FGF20	0.00115242	0.00148655	0.459013	0.283934	0.742051
FGF21	0.0324637	0.0348306	1.79923	1.04274	3.10456
FGF22	0.0200675	0.0214384	1.80393	1.09118	2.98223
FGF5	5.24417e-06	1.30659e-05	3.03388	1.84194	4.99716
FGF9	0.0396653	0.0415399	0.613837	0.383912	0.981464
FGFBP1	0.00016045	0.00026066	2.60571	1.5584	4.35687
FGGY	0.0186203	0.0199964	0.566367	0.350823	0.914342
FGL1	0.025816	0.027562	0.577561	0.354438	0.941141
FHIT	0.019865	0.0212567	0.572936	0.356679	0.92031
FHL3	0.00815065	0.00913959	1.8951	1.1719	3.06461
FHOD3	0.000572456	0.000773504	2.30433	1.41643	3.74879
FIBCD1	0.000826145	0.00108663	2.21267	1.37403	3.56317
FIBP	0.0334562	0.035246	1.65765	1.03556	2.65344
FILIP1	0.0150052	0.0163614	1.79689	1.11361	2.89943
FILIP1L	0.00456871	0.00529609	1.98968	1.2268	3.22696
FIS1	0.000198492	0.000303399	0.394341	0.238016	0.65334
FITM1	0.00435944	0.00513201	0.483505	0.290654	0.804312
FIZ1	0.00864764	0.00974076	1.88799	1.16608	3.05685
FJX1	0.00387287	0.00450705	1.98795	1.23734	3.19389
FKBP10	3.493e-05	6.13925e-05	2.783	1.68697	4.59113
FKBP14	0.023811	0.0253777	1.73388	1.07021	2.80909
FKBP2	0.00909028	0.01009	0.532669	0.32966	0.860693
FKBP4	0.0095832	0.0106689	1.84844	1.15347	2.96215
FKBPL	0.0181603	0.0197794	0.562237	0.346418	0.912511
FKRP	3.83405e-06	9.11057e-06	2.99777	1.84584	4.86859
FLG	0.0452649	0.0469684	1.6146	1.00644	2.59024
FLNA	0.00159302	0.00196858	2.13424	1.3205	3.44942
FLNB	0.000282942	0.000400652	2.4162	1.48247	3.93804
FLT1	0.00121168	0.0015632	2.20901	1.35174	3.60996
FLVCR1	0.01369	0.0150047	1.82076	1.12341	2.95101
FMN2	0.0298942	0.0313669	1.68239	1.04761	2.70183
FMNL2	0.0249596	0.0264685	1.70569	1.06438	2.7334
FMNL3	0.0344154	0.0359881	1.65648	1.03355	2.65487
FMO2	0.013207	0.0145602	0.553908	0.344838	0.889734
FMO3	0.0375264	0.0394619	0.61048	0.381668	0.976467
FMO4	0.025087	0.026643	0.584081	0.363073	0.93962
FMO5	0.0309945	0.0329101	0.597173	0.371862	0.959002
FMOD	0.0160549	0.0175604	0.563279	0.350742	0.904606
FN1	0.00160888	0.00200219	2.1508	1.32321	3.496
FNDC1	0.0125203	0.0137253	1.84774	1.1339	3.01096
FNDC3B	0.00577172	0.00670058	1.99733	1.21133	3.29334
FNDC4	0.0302489	0.0322547	1.67612	1.0447	2.6892
FNDC7	0.00759219	0.00864089	1.96571	1.18697	3.25536
FNIP2	0.00352056	0.00416597	2.0243	1.24961	3.27927
FNTB	0.00910529	0.0103088	0.529117	0.32534	0.860532
FOCAD	0.00165454	0.00208585	0.46419	0.284734	0.756748
FOLR3	0.0259693	0.0276408	1.7045	1.06045	2.73972
FOSL1	0.000244957	0.000360203	2.42677	1.49109	3.9496
FOXA1	0.00250155	0.00305624	2.11848	1.28912	3.4814
FOXC2	5.68324e-05	9.97905e-05	2.69782	1.63648	4.44751
FOXD1	0.000264687	0.000383625	2.40783	1.4825	3.91071
FOXL1	0.0198327	0.0212957	1.75723	1.08753	2.83933
FOXL2	0.00163087	0.0020367	2.1428	1.32035	3.47754
FOXL2NB	5.48201e-05	9.49384e-05	2.70013	1.63971	4.44635
FOXM1	8.74478e-08	4.69259e-07	3.92319	2.30523	6.67674
FOXO4	3.50891e-05	6.47814e-05	0.366985	0.224412	0.600138
FOXP2	0.0282585	0.0300672	1.71116	1.05318	2.78022
FOXP4	6.32985e-06	1.49895e-05	2.98187	1.81825	4.89014
FOXR2	0.0333924	0.0393369	2.44133	1.04457	5.70575
FOXS1	0.00430103	0.00502161	1.98203	1.22901	3.19644
FPGT	0.0434556	0.0453513	0.61332	0.379987	0.989934
FRAT2	0.0130409	0.0143058	0.541278	0.33122	0.884554
FRMD4A	0.0126573	0.013859	1.84463	1.13273	3.00393
FRMD4B	0.00422225	0.00492325	0.503372	0.311966	0.812216
FRMD5	0.00034137	0.000495888	2.39765	1.46578	3.92194
FRMD6	0.0234445	0.0249198	1.7271	1.07131	2.78433
FRMPD4	0.000434199	0.000621756	0.423342	0.258746	0.692642
FSCN1	5.60645e-07	1.94877e-06	3.48244	2.08303	5.82197
FSD1	0.000813257	0.00108258	2.26136	1.38627	3.68885
FSTL1	5.44306e-06	1.47685e-05	3.28298	1.91732	5.62137
FSTL3	0.0206428	0.0218829	1.73254	1.08296	2.77174
FSTL4	0.0455935	0.0475939	0.617557	0.383331	0.994901
FTCDNL1	0.00168746	0.00210433	0.468526	0.288982	0.759621
FTSJ1	0.0021783	0.00260929	2.07885	1.29092	3.34772
FUCA2	0.0110951	0.0122045	1.8475	1.14314	2.98585
FUNDC2	0.000289285	0.00043175	0.411998	0.251454	0.675044
FUT1	0.000975529	0.00127261	2.2199	1.36667	3.60583
FUT3	0.0441563	0.046216	1.62808	1.00821	2.62904
FXYD5	0.00307237	0.0036315	2.02972	1.25969	3.27045
FYTTD1	0.0437166	0.0455893	1.6196	1.0095	2.59841
FZD2	0.000582665	0.000795591	2.31051	1.41641	3.769
FZD6	0.029625	0.031472	1.70241	1.0484	2.76439
G2E3	0.0146082	0.0159098	1.8076	1.11711	2.9249
GAB1	0.0124783	0.0136716	0.550066	0.342042	0.884607
GABBR1	0.0189918	0.0205909	1.78803	1.09331	2.92421
GABBR2	0.00517727	0.00600589	1.95766	1.21233	3.16121
GABRA3	0.0479232	0.0496191	0.624529	0.390342	0.999216
GABRA6	0.00918223	0.0112658	0.431008	0.224808	0.826343
GABRR1	0.0390083	0.0410359	1.65754	1.02079	2.69148
GADD45A	0.000216139	0.000322115	2.47456	1.51034	4.05433
GAGE1	0.000420411	0.000988425	3.79868	1.71682	8.40507
GAL	0.0265408	0.0280871	1.70317	1.05892	2.7394
GAL3ST2	0.00774446	0.00866676	0.52891	0.328729	0.850992
GALNT1	0.000254748	0.000376062	2.50717	1.51073	4.16086
GALNT2	0.000242193	0.000363633	2.44629	1.49597	4.00029
GALNT5	0.00877111	0.00981457	1.87021	1.16285	3.00785
GALNT7	0.0103765	0.0115089	1.84864	1.1478	2.97741
GALNT9	0.0224043	0.0238274	0.574854	0.355653	0.929155
GALT	0.0389237	0.0407964	0.606736	0.37591	0.979301
GAPDH	0.00589922	0.00678688	1.93196	1.19932	3.11215
GAPT	0.00758677	0.0086321	0.523463	0.322919	0.84855
GARNL3	0.00373039	0.00443691	0.498695	0.308809	0.805339
GARS	0.00406572	0.0047025	1.98917	1.23476	3.2045
GAS2	0.024334	0.0259906	0.58261	0.3621	0.937404
GAS2L1	0.0212398	0.0225948	1.74043	1.08094	2.80228
GAS2L3	4.02172e-06	9.97776e-06	3.06784	1.8657	5.04457
GATA2	0.000130665	0.000210865	2.5474	1.55348	4.17723
GATAD2A	0.0260915	0.0275165	1.70112	1.06062	2.72843
GATC	0.0224638	0.023965	1.73183	1.07511	2.78971
GATSL3	0.00955287	0.0106515	1.85332	1.1543	2.97567
GBA2	0.0391692	0.0408315	0.60796	0.377364	0.979465
GCA	0.000533172	0.000726205	0.437756	0.27112	0.70681
GCHFR	0.00936445	0.0104638	0.528848	0.324727	0.861276
GCM1	0.0266185	0.0283486	1.77603	1.06279	2.9679
GDF11	8.80478e-06	2.03013e-05	2.96495	1.79857	4.88773
GDF15	0.0225935	0.0242284	1.73297	1.07425	2.79563
GDF5OS	0.0375233	0.0391588	1.65001	1.02521	2.65557
GDF6	0.0471024	0.048724	1.60243	1.00264	2.561
GDF9	0.0124532	0.0136995	0.549502	0.341364	0.884545
GDNF	0.0039635	0.00460316	1.99329	1.23697	3.21204
GDPD2	0.012263	0.0135811	1.84439	1.13433	2.99894
GDPD5	0.00102402	0.00135375	0.448279	0.274419	0.732289
GEM	0.0367844	0.0385469	1.65849	1.02702	2.67823
GEMIN7	0.00376449	0.00440391	2.00125	1.24144	3.2261
GEMIN8	0.00363303	0.00431836	0.498079	0.308613	0.803864
GEN1	0.00439471	0.00514355	1.99385	1.22957	3.23319
GFPT2	0.0141257	0.0154032	0.548344	0.33725	0.891567
GFRA3	0.0209425	0.0226534	1.75486	1.08196	2.84625
GGA3	0.0312371	0.0327832	0.592284	0.36617	0.958027
GGH	0.0477411	0.0495758	1.61058	1.00088	2.59166
GGN	0.000489869	0.000677316	2.32785	1.42999	3.78947
GGT5	0.029217	0.0312419	0.591954	0.367356	0.953871
GHR	9.43105e-05	0.000158041	0.387928	0.23736	0.63401
GHRL	0.0410306	0.0430102	0.600999	0.367031	0.984113
GIF	0.0288705	0.0312242	1.76341	1.05248	2.95458
GIN1	0.0201896	0.0217379	0.566479	0.348651	0.920399
GINS1	6.24618e-08	3.74599e-07	3.87084	2.29659	6.52422
GINS2	0.000425101	0.000600578	2.36284	1.44588	3.86134
GINS3	0.0443074	0.0458738	1.61413	1.00881	2.58266
GINS4	0.00016802	0.000258587	2.5063	1.53099	4.10291
GIPC3	0.00826519	0.00919789	1.88457	1.16981	3.03606
GJA4	0.0281753	0.0295642	1.69082	1.0535	2.71369
GJA8	0.021184	0.0244115	2.12291	1.10209	4.08925
GJB3	0.000309668	0.000449589	2.38261	1.46709	3.86945
GJB4	0.0221858	0.0235397	1.72202	1.07584	2.75632
GJC1	3.27902e-05	6.11177e-05	2.77593	1.685	4.57315
GKAP1	0.00751535	0.00850743	0.526096	0.326055	0.848865
GLB1L	0.0360736	0.037902	0.606105	0.377782	0.972421
GLCE	0.0381137	0.0398534	1.66043	1.02379	2.69296
GLIPR1	0.0193508	0.0206101	1.7434	1.089	2.79105
GLIPR1L2	0.00302353	0.00361575	0.488398	0.301401	0.791411
GLIPR2	0.030761	0.0321728	1.67179	1.0447	2.6753
GLIS3	0.00620705	0.00701142	1.93232	1.19709	3.11912
GLRB	0.00572056	0.0065688	1.94074	1.20312	3.1306
GLS2	0.00610109	0.00703937	0.514879	0.317715	0.834396
GLT8D2	0.0179594	0.0193825	1.76533	1.09627	2.84271
GLTSCR2	0.0395528	0.041561	0.605535	0.373775	0.981001
GLYATL2	0.0216663	0.0232465	1.761	1.0802	2.87086
GMPR	0.000261113	0.000385812	0.41757	0.257816	0.676315
GNA12	0.000181997	0.000281826	2.50958	1.52732	4.12357
GNA14	0.0138438	0.015232	0.555616	0.345659	0.893104
GNAS	0.00181738	0.00223471	2.11327	1.30804	3.41418
GNAT1	0.00733214	0.00826917	1.91152	1.18181	3.09177
GNAT3	0.010951	0.0127057	2.06548	1.16747	3.65421
GNB3	0.00654211	0.00751953	1.92181	1.19035	3.10275
GNG10	0.0383597	0.0398288	1.64118	1.0233	2.63216
GNG12	0.0121448	0.0132892	1.82073	1.13301	2.92591
GNG4	0.00364653	0.00427015	1.99582	1.24241	3.2061
GNG8	0.00602937	0.00694064	1.92185	1.19602	3.08817
GNLY	0.00133035	0.00169628	0.462116	0.285373	0.748323
GNMT	0.000134725	0.000213034	0.388613	0.235643	0.640885
GNPTAB	0.00204783	0.00249755	2.08304	1.29453	3.35183
GOLGA3	0.00151466	0.00189927	2.13462	1.32276	3.44478
GOLGA6D	0.0111508	0.016307	3.13088	1.23371	7.94551
GOLGA7	0.0257451	0.027301	1.71677	1.0624	2.77419
GOLGA8H	0.0109957	0.0120716	0.53822	0.331803	0.87305
GOLGA8K	0.0295761	0.0312492	0.588628	0.363416	0.953406
GOLGA8M	0.041145	0.0428936	0.610106	0.37816	0.984315
GOLGA8N	0.0307082	0.0321929	0.595717	0.370851	0.956932
GOLGA8O	0.0286828	0.0304224	0.577926	0.351764	0.949496
GOLGA8S	0.00187177	0.00232602	0.463629	0.282685	0.760393
GOLIM4	0.0179119	0.0194857	1.79332	1.09861	2.92733
GOLT1A	0.0435318	0.0454425	0.619473	0.387491	0.990335
GOLT1B	5.96871e-06	1.37524e-05	3.01501	1.83327	4.95851
GOPC	0.00164411	0.00205592	2.16951	1.32574	3.5503
GP9	0.00211525	0.00271264	2.2204	1.31823	3.73999
GPANK1	0.00228643	0.00281339	0.479166	0.295707	0.776444
GPATCH2	0.0297062	0.031491	1.69027	1.04768	2.72699
GPBAR1	0.0295677	0.0314352	0.589678	0.364462	0.954063
GPC1	0.0341325	0.0359432	1.65853	1.03375	2.66093
GPC2	0.00588709	0.00675468	1.95118	1.20294	3.16484
GPC6	0.00643925	0.00730246	1.94287	1.19594	3.15628
GPD1L	0.00993859	0.0110059	0.539397	0.335153	0.868109
GPER1	0.0380907	0.0398905	0.607284	0.377389	0.977225
GPLD1	0.034016	0.0357564	0.604496	0.377862	0.967059
GPR116	0.00345062	0.00410608	2.06574	1.25863	3.39043
GPR133	0.00010782	0.000176152	0.396229	0.244267	0.642729
GPR137C	0.000451795	0.000634581	2.3928	1.45054	3.94714
GPR149	0.00141417	0.00294536	3.66498	1.55687	8.62761
GPR161	1.51782e-05	3.57938e-05	3.08941	1.80955	5.27451
GPR162	1.9521e-05	3.82746e-05	2.7868	1.71096	4.53912
GPR176	0.0109364	0.0119884	1.83978	1.14347	2.96011
GPR182	0.00247304	0.00303285	2.12494	1.29097	3.49767
GPR3	4.46021e-05	8.07103e-05	2.70377	1.64896	4.43333
GPR4	0.00347701	0.0041021	2.0488	1.25541	3.34357
GPR45	0.0463489	0.0480261	1.62597	1.00423	2.63264
GPR56	0.00025135	0.000373356	2.43557	1.4916	3.97695
GPR63	0.0302249	0.0323521	1.69433	1.04537	2.74617
GPR78	0.00575704	0.00653142	1.94913	1.20497	3.15286
GPR85	0.0227325	0.0240838	1.72446	1.07408	2.76868
GPRC5C	0.0050899	0.00590754	0.515327	0.321436	0.826174
GPSM1	1.29862e-06	3.82626e-06	3.35629	2.00817	5.60942
GPSM2	0.000152199	0.000241995	2.53032	1.54133	4.15392
GPX7	0.000216498	0.000324101	2.57758	1.53829	4.31905
GRAMD1A	0.00250746	0.0030062	2.06622	1.27933	3.33711
GRAMD1C	0.0267605	0.0284496	0.587985	0.365641	0.945534
GRAMD3	0.00699186	0.00783869	1.92203	1.18739	3.11119
GRAP	0.0112295	0.0123165	1.8317	1.14031	2.94229
GRB7	0.00331886	0.00400646	0.491355	0.302834	0.797233
GREB1L	7.78121e-05	0.000131335	2.56233	1.58193	4.15031
GRID2IP	0.00430247	0.00500793	0.50585	0.314284	0.814181
GRIN3A	0.0103305	0.0115209	0.53455	0.32883	0.868972
GRK7	0.0206694	0.0223499	1.78286	1.08558	2.92803
GRM2	0.000126719	0.00019918	2.536	1.55316	4.14076
GRWD1	0.0098057	0.0108543	1.85374	1.15295	2.98051
GS1-114I9.3	0.0116872	0.0128581	0.545175	0.338034	0.879248
GSAP	0.0455605	0.0474068	0.618603	0.384778	0.99452
GSC2	0.0338767	0.0377683	2.14558	1.04409	4.40911
GSG1	0.0012396	0.00155561	2.17359	1.34375	3.5159
GSG2	0.000167017	0.000260507	2.48716	1.52517	4.05592
GSK3A	0.0384621	0.0404373	1.64382	1.02189	2.64425
GSTT2B	0.0368669	0.0388133	1.63944	1.02573	2.62033
GTDC1	0.0343015	0.0359525	1.66146	1.03384	2.6701
GTF2A1L	0.0346699	0.0368139	0.583026	0.351338	0.9675
GTF2E2	0.000165654	0.000251895	2.47948	1.52474	4.03204
GTF2H3	0.0052044	0.00596638	1.95139	1.21167	3.14273
GTF2IRD2	0.000748511	0.00100117	0.44672	0.276415	0.721952
GTF2IRD2B	0.00035669	0.000503617	0.421665	0.259223	0.685899
GTSE1	3.33251e-07	1.25069e-06	3.50574	2.1111	5.82171
GTSF1L	0.0183748	0.0196047	1.74899	1.09369	2.79692
GUCY1A2	0.0203678	0.0219896	1.7591	1.08493	2.8522
GUCY1B3	0.00290127	0.00349922	2.05986	1.26821	3.34569
GUK1	0.0292366	0.0308837	1.68295	1.04906	2.69987
GYS1	0.0192327	0.020787	1.75281	1.08917	2.82081
GZMA	0.0239308	0.0256387	0.579235	0.358574	0.935686
H2AFV	0.00826009	0.00924491	1.88515	1.16952	3.03866
H2AFX	1.33331e-05	2.82759e-05	2.87194	1.75266	4.70603
H6PD	0.000456581	0.000640094	0.432618	0.267421	0.699864
HAAO	0.0167094	0.0181538	1.76403	1.10153	2.82496
HABP4	0.00537317	0.00619351	1.95045	1.20892	3.14683
HAMP	0.0445994	0.0466491	0.610298	0.375202	0.992702
HAPLN1	8.37682e-06	1.80606e-05	2.92419	1.79054	4.77558
HAS3	0.000380795	0.000535364	2.34041	1.44626	3.78736
HAUS1	0.000194428	0.000287631	2.47077	1.51533	4.02866
HAUS8	0.043231	0.044815	1.62285	1.01127	2.60431
HAVCR1	0.0194117	0.0211392	1.75152	1.08763	2.82066
HBA1	0.0215993	0.0232383	1.73928	1.07841	2.80516
HBA2	0.00934741	0.0105304	1.87514	1.15831	3.03559
HBEGF	0.00100611	0.00128444	2.20494	1.36251	3.56825
HBS1L	0.0376417	0.0393044	1.6577	1.02508	2.68072
HCRTR2	0.00559072	0.00642653	1.95498	1.20712	3.16616
HDAC2	0.00568531	0.0064759	1.95069	1.20584	3.15562
HDAC6	0.00651293	0.00744096	0.519309	0.32139	0.839113
HDDC2	0.0464571	0.0481896	0.622222	0.388625	0.99623
HDGFRP3	0.000402888	0.000572523	2.36841	1.45002	3.86847
HECW2	0.0122296	0.0133629	1.84933	1.13625	3.00992
HELLS	3.85106e-07	1.40479e-06	3.55041	2.12187	5.94071
HELQ	0.0110996	0.0123324	0.540185	0.333479	0.875018
HES2	0.000486003	0.000672232	2.31449	1.42693	3.75412
HES7	0.00945851	0.0105468	1.8587	1.15581	2.98904
HEXDC	0.000117463	0.000191243	0.386883	0.234902	0.637194
HEXIM2	1.13805e-05	2.41963e-05	0.3418	0.207656	0.562598
HEY1	0.00603987	0.00683407	1.93783	1.19984	3.12975
HEY2	0.012039	0.0131603	1.8523	1.13785	3.01535
HEYL	0.000896083	0.00117297	2.20573	1.36796	3.55657
HGD	0.0152445	0.0166421	1.78846	1.11127	2.87832
HGF	0.00531608	0.00614319	1.95084	1.20955	3.14645
HIBCH	0.00334008	0.00398896	0.494919	0.306607	0.798889
HIC1	0.0136368	0.0148663	1.80817	1.12263	2.91235
HIF1A	0.024052	0.0256964	1.75083	1.07036	2.86391
HIGD1C	0.00909945	0.0101439	0.534799	0.331873	0.861807
HIGD2A	0.010996	0.0121727	0.534566	0.327613	0.872249
HILPDA	0.0316175	0.0335302	1.68334	1.04143	2.72089
HINT1	0.0266633	0.0284268	0.578518	0.354594	0.943851
HINT2	0.0186684	0.0201108	0.561674	0.34533	0.913553
HIPK3	0.0356249	0.0376011	0.604356	0.375946	0.971539
HIPK4	0.0370865	0.0389231	0.597871	0.366926	0.974176
HIST1H1B	0.0356077	0.0380189	1.65178	1.02813	2.65373
HIST1H1C	0.0169506	0.0183896	0.559476	0.345231	0.906679
HIST1H1E	0.0288306	0.0306499	1.68232	1.04972	2.69616
HIST1H1T	0.0129884	0.0148967	0.483557	0.269428	0.867865
HIST1H2AC	0.000178038	0.000277033	0.400507	0.244564	0.655885
HIST1H2AE	0.0459637	0.0477192	0.615663	0.380893	0.995137
HIST1H2AJ	0.0179306	0.0192632	1.78585	1.09885	2.90236
HIST1H2BD	0.000450823	0.000630794	0.429336	0.264384	0.697203
HIST1H2BN	0.0228941	0.0245064	0.575256	0.355299	0.931385
HIST1H3C	0.00779593	0.00890087	1.89771	1.17425	3.06688
HIST1H3E	0.0374721	0.0390694	0.607041	0.377841	0.975276
HIST1H3I	0.0367229	0.0396844	1.81299	1.02847	3.19594
HIST1H4A	0.00573959	0.00658193	1.97061	1.20811	3.21435
HIST1H4H	0.00903005	0.0100908	0.533127	0.330158	0.860874
HIST1H4I	0.00531231	0.00617674	0.505477	0.310184	0.823728
HIST1H4K	0.00575681	0.00662379	0.509121	0.312744	0.828806
HIVEP2	0.0214107	0.0229843	1.77226	1.08216	2.90243
HJURP	6.90076e-07	2.20711e-06	3.39181	2.0455	5.62425
HK1	0.00461285	0.00534929	1.96785	1.22211	3.16866
HLA-E	0.00328897	0.00390842	0.48659	0.29831	0.793705
HLF	6.7347e-05	0.0001135	0.385453	0.237536	0.625479
HMCN1	0.0164176	0.0179945	1.78062	1.10402	2.87187
HMGA1	0.0314074	0.0329881	1.67883	1.04275	2.70294
HMGA2	0.0196983	0.0210937	1.74754	1.08744	2.80832
HMGB2	8.79723e-06	1.9293e-05	2.95843	1.79882	4.86558
HMGCL	0.02691	0.028683	0.58015	0.35621	0.944873
HMGCR	0.00187158	0.00235807	2.1536	1.31351	3.53098
HMGCS1	0.00845946	0.00953707	1.88406	1.16706	3.04155
HMGN5	0.00157232	0.00198855	0.470895	0.292141	0.759025
HMGXB4	0.0163079	0.0176963	1.80083	1.10757	2.92803
HMHB1	0.0228606	0.0251322	1.83294	1.07853	3.11504
HMMR	0.00286586	0.00343343	2.04069	1.26554	3.29064
HMP19	0.0105838	0.0118886	1.8433	1.14459	2.96852
HMX3	0.00944691	0.0112278	2.16737	1.19195	3.94104
HN1	3.74814e-06	9.47538e-06	3.11821	1.88507	5.15802
HN1L	0.0134997	0.0146263	1.8099	1.12413	2.91403
HNF1A	0.00279395	0.00338086	2.05454	1.26937	3.32539
HNF1B	0.0295584	0.0310794	1.69689	1.04927	2.74422
HNF4G	0.0305959	0.0323397	1.6826	1.04479	2.70978
HNRNPA3	0.0399272	0.041539	1.63403	1.01901	2.62026
HNRNPCL1	0.0202068	0.0220483	1.91112	1.09772	3.32725
HNRNPL	0.0483601	0.0499601	1.60611	1.00008	2.57937
HNRNPUL1	0.00175427	0.00216531	2.12503	1.3126	3.44031
HOMER1	0.00344661	0.00411882	2.06239	1.25777	3.38175
HOMER3	0.0280525	0.0295505	1.69239	1.05364	2.71837
HOMEZ	0.0024885	0.00303477	0.473742	0.289071	0.776386
HOOK3	0.014829	0.0161577	1.79525	1.11443	2.892
HOXA10	0.0364554	0.0383053	1.6625	1.02777	2.68925
HOXA11	0.00166191	0.00208384	2.16698	1.32433	3.54581
HOXA13	0.0128556	0.0140911	1.82902	1.12946	2.9619
HOXA9	0.0132054	0.0145346	1.81603	1.12538	2.93052
HOXB13	0.0235129	0.0252312	1.74278	1.07141	2.83484
HOXB2	0.0410916	0.0428363	0.609772	0.377803	0.984168
HOXB4	4.96913e-05	8.95699e-05	0.370432	0.22538	0.608839
HOXB8	0.00902091	0.0101466	1.87697	1.16138	3.03347
HOXB9	4.7564e-05	8.6838e-05	2.69933	1.64396	4.43223
HOXC11	0.0076302	0.00857003	1.90355	1.17794	3.07613
HOXC12	0.00963831	0.0108103	1.90092	1.15997	3.11518
HOXC13	0.0162827	0.0177438	1.80237	1.10751	2.9332
HOXC5	0.0256226	0.0274153	0.585295	0.363623	0.9421
HOXC8	0.0214708	0.0230228	1.73679	1.079	2.79558
HOXD1	0.00430387	0.00507285	1.99346	1.23045	3.22962
HOXD12	0.0342591	0.0364219	1.7623	1.03646	2.99647
HOXD8	0.02957	0.0313469	1.69878	1.04857	2.75218
HP	0.000517224	0.000708291	0.434875	0.268569	0.704163
HPD	0.0432234	0.0452564	1.62745	1.01034	2.62149
HPGD	0.0373248	0.0391714	1.66467	1.02563	2.70189
HPR	2.51697e-06	6.40792e-06	0.322796	0.19753	0.5275
HPRT1	2.62127e-05	4.88802e-05	2.72662	1.68025	4.4246
HPSE	0.0374141	0.039537	0.601453	0.370662	0.975945
HPSE2	0.00311519	0.00374289	0.490238	0.302762	0.793805
HPX	0.0067438	0.00772714	1.94053	1.19144	3.16058
HRASLS5	0.035167	0.0368387	0.604028	0.376266	0.969659
HS3ST6	0.0379482	0.0399584	0.607897	0.378072	0.977429
HS6ST1	0.000975416	0.00125336	2.1874	1.35967	3.51904
HS6ST3	0.0208189	0.0223267	0.577525	0.360609	0.924922
HSD11B1L	0.0224116	0.0239708	1.74554	1.07621	2.83117
HSD17B8	0.00345982	0.00412278	0.48975	0.300713	0.797623
HSF2	0.00762821	0.00855824	1.94785	1.18496	3.2019
HSF2BP	0.000538525	0.000742019	2.33402	1.42641	3.81913
HSH2D	0.0261729	0.0279654	0.583762	0.361215	0.943422
HSP90AA1	0.0374034	0.0392059	1.64836	1.02504	2.65071
HSP90AB1	0.0342489	0.0357895	1.65711	1.03409	2.65547
HSPA12A	0.0335936	0.0352457	0.601236	0.374426	0.965439
HSPA12B	0.00212371	0.00259532	2.07322	1.29003	3.3319
HSPA13	0.017626	0.0189425	1.77255	1.09892	2.8591
HSPA1B	0.00524522	0.00608696	1.96769	1.21316	3.1915
HSPA1L	0.0158707	0.0173141	0.560583	0.348047	0.902903
HSPB9	0.0019602	0.00243706	0.476476	0.295021	0.769536
HSPBP1	0.0257475	0.0275234	1.70802	1.06107	2.74943
HSPG2	0.00290453	0.00345039	2.04911	1.26694	3.31417
HTR1B	5.69332e-06	1.54e-05	3.19673	1.88745	5.41423
HTR1F	0.00209994	0.00261107	2.11537	1.29874	3.44547
HTR3B	0.00983101	0.0127423	2.48236	1.21385	5.07651
HTRA1	0.032101	0.0339986	0.596251	0.369674	0.961698
HTRA3	0.0172901	0.0187387	1.76541	1.09908	2.8357
HUS1B	0.0159153	0.0173259	1.78802	1.10794	2.88556
HYAL2	0.00782943	0.00876607	1.89812	1.17544	3.06512
HYLS1	0.0183449	0.0197308	1.76813	1.09506	2.85492
IBSP	0.0411739	0.0433762	1.63675	1.01477	2.63998
ICA1L	0.0271836	0.0288906	1.73736	1.05853	2.85152
ICAM1	0.00609949	0.00692215	1.93905	1.19914	3.13551
ICAM2	0.0305088	0.0320805	1.67405	1.04508	2.68154
ICAM5	0.0276498	0.0293572	1.69197	1.05421	2.71555
IDH1	0.0423305	0.0443632	0.612263	0.37953	0.98771
IDO2	0.00995145	0.0111855	0.538866	0.334213	0.868836
IFFO2	0.0190111	0.0203576	1.75362	1.09101	2.81866
IFIT2	0.00394514	0.00463191	0.495951	0.30523	0.805843
IFIT3	0.0155	0.016828	0.556013	0.343618	0.899692
IFIT5	0.0128263	0.0140572	0.546054	0.336919	0.885008
IFITM1	0.00317878	0.00379959	0.49241	0.304775	0.795563
IFITM2	0.00879705	0.00987459	0.526522	0.323444	0.857105
IFNGR2	0.00680664	0.00773808	1.91375	1.18697	3.08552
IFNW1	0.0130173	0.01499	0.4778	0.263521	0.866319
IFRD1	0.00355225	0.00425495	2.03492	1.25025	3.31206
IFT140	0.00814135	0.00920994	0.532154	0.331014	0.855518
IFT20	0.0274473	0.0293444	1.69864	1.05466	2.73583
IFT52	0.0108335	0.0119483	1.87032	1.14788	3.04743
IFT74	0.00608962	0.00701661	0.515258	0.318181	0.834402
IFT81	0.00133347	0.00171134	2.20592	1.34545	3.61672
IGBP1	0.000184184	0.00028971	0.393959	0.238056	0.651963
IGDCC3	0.014515	0.0157333	1.80853	1.11812	2.92523
IGDCC4	0.00418606	0.00485711	2.01182	1.23684	3.27237
IGF2	0.00462517	0.0054065	2.01207	1.22943	3.29294
IGF2BP1	0.000195744	0.00029282	2.43686	1.50481	3.94622
IGF2BP3	7.1024e-05	0.000123381	2.64368	1.60943	4.34255
IGF2R	0.0401604	0.0420207	1.65517	1.01834	2.69023
IGFBP3	0.00868137	0.00961403	1.88446	1.16653	3.04426
IGFBP7	0.0166487	0.0178517	1.77479	1.10405	2.85301
IGFL3	0.00231253	0.00280839	2.07411	1.2853	3.34703
IGFL4	0.0130466	0.0144206	1.83627	1.12849	2.98795
IGSF23	0.0198015	0.0212748	1.77195	1.08896	2.88328
IKBIP	6.67794e-05	0.000113245	2.64628	1.61456	4.33728
IKZF5	0.0432086	0.0448857	0.616137	0.383842	0.989012
IL11	7.93123e-06	1.85441e-05	2.95843	1.80067	4.86061
IL16	0.0320265	0.0339011	0.59155	0.364183	0.960869
IL17B	0.000662535	0.000898189	2.28963	1.40416	3.73347
IL17RA	0.0478563	0.049712	0.618353	0.382592	0.999395
IL17RE	0.00563828	0.00649768	0.514514	0.318827	0.830307
IL18	0.0138644	0.0151193	0.547198	0.336432	0.890004
IL18R1	0.0326346	0.0345063	1.66778	1.038	2.67966
IL1RL2	0.0178239	0.0193886	1.77826	1.09754	2.88118
IL20	0.0257804	0.0275355	0.580945	0.358402	0.941671
IL24	0.0130949	0.0144062	0.550297	0.341053	0.887917
IL27RA	0.00222887	0.0026815	2.07724	1.28887	3.34783
IL31RA	0.0108822	0.0120819	1.84699	1.14386	2.98234
IL32	0.0134971	0.0146393	1.80455	1.12341	2.89869
IL37	0.0216618	0.023649	1.84283	1.08525	3.12926
IL6R	0.0320359	0.0338936	0.597494	0.371262	0.96158
IL7	0.0261735	0.027901	0.583568	0.36106	0.943201
ILF3	0.0325425	0.0340067	1.66709	1.03933	2.674
IMP3	0.0100715	0.0112066	0.53083	0.325388	0.865983
IMPDH1	0.0010104	0.00131776	2.19256	1.35803	3.53992
INA	0.0189096	0.0204399	1.76787	1.09204	2.86198
INCENP	0.0215405	0.0231249	1.74473	1.0793	2.82043
INHA	0.00686342	0.00775272	0.522475	0.323992	0.84255
INHBA	0.0153703	0.0167536	1.79789	1.11178	2.9074
INHBE	0.000908991	0.00119623	2.23852	1.37482	3.64483
INMT	0.00780725	0.00874721	0.527456	0.326964	0.850886
INPP1	0.0325634	0.034418	1.68468	1.03901	2.7316
INPP4B	0.0173303	0.0185668	1.76673	1.09998	2.83763
INPP5A	0.0223914	0.0240206	1.73552	1.07521	2.80136
INPP5F	0.0115353	0.0126563	0.546105	0.33943	0.878621
INS-IGF2	0.00959335	0.0130863	2.81566	1.24301	6.37802
INSL4	0.0325306	0.035027	1.75503	1.0403	2.96079
INSL6	0.0299739	0.0317853	0.586101	0.359889	0.954503
IPMK	0.0190196	0.0205393	1.77459	1.09226	2.88317
IPO5	0.00129554	0.00165301	2.16428	1.33795	3.50098
IPO9	0.000222835	0.000333204	2.51262	1.519	4.15621
IQCA1	0.0126233	0.0140256	0.549305	0.340587	0.885929
IQGAP3	2.89036e-09	3.14845e-08	4.64539	2.69613	8.00394
IQSEC2	0.0267525	0.0283208	0.588548	0.366447	0.945265
IRF2	0.0319077	0.0337614	0.595987	0.369594	0.961055
IRF2BP1	0.0330348	0.0346958	1.67001	1.03758	2.68793
IRF2BPL	0.012081	0.0134243	0.545254	0.337119	0.88189
IRGQ	0.00663918	0.00757946	1.91141	1.18806	3.07515
IRS1	0.0333573	0.0349283	1.67415	1.03713	2.70243
IRS2	0.0362026	0.0380204	0.604693	0.375963	0.972579
IRX1	0.0177015	0.0191158	0.564668	0.350096	0.91075
IRX2	0.0181966	0.0194961	1.76077	1.09533	2.83048
ISG20L2	0.00151115	0.00187339	2.13932	1.32466	3.45499
ISL1	0.0162323	0.0177397	1.81682	1.10906	2.97625
ISL2	0.000230016	0.000344465	2.4516	1.50036	4.00594
ISOC1	4.5846e-05	8.12024e-05	0.372012	0.227496	0.608331
ISY1	0.0185599	0.0201183	1.75673	1.0923	2.82532
ISYNA1	0.0111466	0.0124288	0.542686	0.336059	0.876357
ITGA1	0.040548	0.0424268	1.63363	1.01691	2.62437
ITGA10	0.0306708	0.0323648	1.69832	1.04554	2.75867
ITGA11	0.00469156	0.00543089	1.96895	1.22128	3.17435
ITGA2	0.0138177	0.0151503	1.80753	1.12104	2.91441
ITGA5	4.51985e-05	8.64543e-05	2.82887	1.68322	4.75426
ITGA6	0.0456454	0.0475742	1.62588	1.00521	2.62978
ITGAV	0.00153013	0.00192764	2.1762	1.33128	3.55736
ITGB1	8.24975e-06	1.90973e-05	3.09179	1.84278	5.18737
ITGB1BP2	0.015279	0.0167552	1.81586	1.11378	2.96051
ITIH1	0.0446961	0.0473038	0.596029	0.357445	0.993861
ITLN1	0.000493735	0.000696239	0.425782	0.259935	0.697444
ITM2B	0.000256568	0.000374391	0.413374	0.254081	0.672534
IVD	0.00204308	0.00250566	0.471926	0.290005	0.767966
IVL	0.00265047	0.00321501	2.06133	1.27401	3.33519
IVNS1ABP	0.00107353	0.00138307	2.24626	1.36795	3.68849
IZUMO1	0.0114528	0.0126112	1.83474	1.1389	2.95573
IZUMO3	0.0139303	0.0165155	0.433913	0.219258	0.858716
JADE2	0.033503	0.0354445	0.594551	0.366237	0.9652
JADE3	0.00016036	0.0002498	2.51232	1.53453	4.11315
JAM2	0.022564	0.0240054	1.72556	1.07445	2.77126
JAM3	0.00601916	0.00689609	1.95585	1.20225	3.18184
JDP2	0.0126426	0.0138962	1.81906	1.12931	2.9301
JMJD6	0.00493447	0.0056902	1.95964	1.2164	3.15701
JMJD8	0.0304428	0.0320865	0.595343	0.370514	0.956601
JPH2	0.00342041	0.00401823	2.02709	1.25255	3.28058
JPH3	0.00226283	0.00280123	2.08595	1.28798	3.37828
KALRN	0.0343223	0.0358983	1.66524	1.03414	2.68148
KANK3	0.0206009	0.0219848	1.74413	1.08361	2.80726
KAZALD1	0.0063974	0.00727374	1.92824	1.19379	3.11454
KBTBD3	0.00615747	0.00707473	0.512583	0.315177	0.833631
KCNA10	0.0107558	0.0120719	1.85727	1.14531	3.01181
KCNA7	0.0372854	0.0392234	1.64511	1.0249	2.64062
KCNAB3	0.00450264	0.00535121	2.00265	1.22844	3.26477
KCND3	0.00508345	0.00593502	0.512157	0.317974	0.824924
KCNE4	0.0480634	0.0499753	1.6045	1.00005	2.57429
KCNE5	0.00113196	0.00148011	2.24839	1.36427	3.70546
KCNG3	0.0161017	0.0177177	1.80664	1.10809	2.94559
KCNH1	0.0188683	0.0204266	1.80319	1.09544	2.96822
KCNH7	0.00265189	0.00322421	0.488174	0.302936	0.786682
KCNJ14	0.000774824	0.00101974	2.25742	1.38878	3.66937
KCNK12	0.0138249	0.0151185	1.79884	1.12017	2.88868
KCNK5	7.35529e-05	0.000126717	0.379534	0.231255	0.622888
KCNK6	0.0047352	0.00548372	1.9554	1.21814	3.13888
KCNMA1	0.000775798	0.00104632	2.25632	1.38702	3.67045
KCNMB4	0.0283406	0.0299898	1.6914	1.05224	2.7188
KCNN2	0.0374764	0.0392807	1.65396	1.02503	2.66879
KCNN4	0.0339262	0.035517	1.66196	1.03502	2.66865
KCNQ5	0.000357931	0.000500441	2.34853	1.45209	3.7984
KCNU1	0.00976797	0.010868	0.530874	0.326107	0.864217
KCTD17	0.00287958	0.00346212	2.02021	1.2608	3.23702
KCTD18	0.00209036	0.00256074	0.480545	0.298478	0.773671
KCTD2	0.0406886	0.0427579	0.612316	0.380979	0.984124
KCTD5	0.00546044	0.0062166	1.94433	1.20758	3.13057
KCTD6	0.000317232	0.000466299	0.414705	0.253303	0.67895
KCTD9	0.0332772	0.0353501	1.68129	1.03629	2.72774
KDELC1	0.000509315	0.000686285	2.34121	1.43271	3.8258
KDELR1	0.00644651	0.00723666	1.92387	1.19342	3.10139
KDELR2	1.22593e-06	3.63007e-06	3.34414	2.0064	5.5738
KDM5D	0.0279623	0.029509	0.592141	0.369404	0.949178
KDM8	0.0075818	0.00863053	0.523687	0.323165	0.848633
KHK	0.0376245	0.0393531	1.64568	1.0246	2.64324
KIAA0101	5.88703e-07	1.96343e-06	3.43481	2.0659	5.71079
KIAA0430	0.0153059	0.016686	0.557753	0.345793	0.899639
KIAA0907	0.0232059	0.0251255	1.73903	1.0715	2.82242
KIAA1033	0.00171831	0.00210695	2.13417	1.31633	3.46013
KIAA1211	0.000894047	0.00119547	2.2999	1.38963	3.80645
KIAA1324	0.00150782	0.00192103	2.1763	1.33152	3.55706
KIAA1407	0.0227423	0.0242552	0.578627	0.359506	0.931302
KIAA1462	0.00821666	0.00919735	1.88942	1.17056	3.04973
KIAA1524	3.81448e-05	7.00364e-05	2.76333	1.67432	4.56065
KIAA1549	0.0255047	0.0270885	1.72487	1.06367	2.79706
KIAA1614	0.0259305	0.0276622	1.71437	1.06105	2.76995
KIAA1715	0.0380274	0.0399307	1.66372	1.02369	2.70392
KIAA1731NL	0.00411865	0.00476902	1.98789	1.23358	3.20345
KIAA1841	0.000133617	0.00020664	2.52668	1.54857	4.1226
KIAA1919	0.00802648	0.00904992	1.93023	1.178	3.16279
KIAA2012	0.0133021	0.0146328	0.55172	0.342267	0.88935
KIF11	5.02652e-05	8.87593e-05	2.67055	1.63408	4.36444
KIF14	3.19096e-09	2.70843e-08	4.33042	2.58296	7.26009
KIF15	3.76244e-05	6.93044e-05	2.71994	1.66145	4.45278
KIF18A	0.0125827	0.0137645	1.8182	1.12995	2.92567
KIF18B	7.02093e-08	3.32645e-07	3.78865	2.27165	6.3187
KIF20A	9.47076e-09	7.86084e-08	4.46535	2.58632	7.70955
KIF20B	0.000693824	0.000940804	2.26807	1.39608	3.68469
KIF22	0.00666639	0.00756867	1.92002	1.18959	3.09895
KIF23	2.20672e-09	2.47946e-08	4.71393	2.73296	8.13077
KIF26B	0.00252221	0.00306136	2.07479	1.27996	3.36319
KIF2A	0.032928	0.0346422	1.66335	1.03743	2.66691
KIF2C	9.91355e-08	4.33626e-07	3.69989	2.22753	6.14545
KIF3C	0.00131758	0.00167748	2.22689	1.35149	3.66932
KIF4A	2.77114e-10	5.44123e-09	5.13309	2.96269	8.89349
KIF4B	0.00104621	0.00133456	2.22561	1.36521	3.62826
KIF5A	0.0198154	0.0216609	1.75677	1.08602	2.84177
KIF6	0.00037844	0.000539696	0.425546	0.262285	0.690431
KIF7	0.000214516	0.000327271	2.51513	1.52068	4.1599
KIFAP3	0.0372069	0.039275	0.607178	0.377819	0.975771
KIFC1	8.17062e-06	1.84903e-05	2.93801	1.79405	4.8114
KIR2DL3	0.0319169	0.0335411	0.596949	0.370961	0.960606
KIRREL	0.00293825	0.00348152	2.03369	1.26321	3.27411
KIRREL3	0.00151277	0.00190978	2.14106	1.32389	3.4626
KISS1	0.00499397	0.00574809	1.99095	1.22131	3.24558
KLC4	0.0103289	0.0114764	0.541291	0.336315	0.871194
KLF12	0.0152209	0.0165018	1.78829	1.11194	2.87604
KLF15	0.00458442	0.00527934	0.50507	0.312549	0.816178
KLF16	0.00196936	0.00240174	2.08311	1.29695	3.34582
KLF7	0.0269096	0.028532	1.72191	1.05872	2.80053
KLF9	0.0371716	0.0391016	0.607566	0.378449	0.975394
KLHDC1	0.00531491	0.00619711	0.50957	0.314446	0.825776
KLHDC2	0.00321746	0.00387928	0.490942	0.302923	0.795662
KLHL1	0.0408343	0.0429538	1.63948	1.0158	2.64607
KLHL18	9.57882e-05	0.000161165	2.71152	1.61504	4.55242
KLHL23	0.03945	0.0413266	1.64969	1.01989	2.6684
KLHL24	0.047965	0.0496784	0.622827	0.388172	0.999335
KLHL25	0.0296452	0.0314836	1.68112	1.04719	2.69879
KLHL38	0.0030945	0.00367292	2.02783	1.25858	3.26726
KLHL41	0.0284265	0.0300145	0.589299	0.365503	0.950124
KLHL42	0.00119284	0.00157629	2.29498	1.37097	3.84175
KLHL9	0.0073831	0.00836318	0.52512	0.325344	0.847567
KLK11	0.00207132	0.00255686	0.478716	0.296628	0.772582
KLK12	0.010545	0.0116854	0.539983	0.334472	0.871768
KLK8	0.0240856	0.0257274	0.583231	0.363132	0.936736
KLRB1	0.02609	0.0278482	0.585652	0.36356	0.943415
KLRC2	0.0372095	0.0392181	0.605059	0.375304	0.975469
KLRD1	0.0235131	0.025223	0.581169	0.361313	0.934805
KLRF1	0.0170143	0.0187028	0.565985	0.352177	0.909598
KLRG2	0.0186957	0.0199824	1.76552	1.09373	2.84995
KNDC1	0.00709123	0.00802769	0.525028	0.32606	0.84541
KNSTRN	0.0117036	0.012836	1.82757	1.13659	2.93865
KNTC1	0.00706145	0.00800042	1.92732	1.18676	3.13
KPNA2	4.9878e-09	3.5182e-08	4.33791	2.57476	7.30845
KPNA3	0.00193541	0.00239658	2.13915	1.30934	3.49485
KPNA4	0.00589545	0.00680885	1.95582	1.20316	3.17933
KPRP	0.024296	0.0261812	1.80496	1.0725	3.03766
KRAS	0.00809718	0.00913122	1.87968	1.16959	3.02089
KRCC1	0.0291481	0.0310608	0.592232	0.367873	0.953423
KRT13	0.0341485	0.036393	1.69389	1.03395	2.77506
KRT14	0.00277249	0.0033423	2.07618	1.27454	3.38202
KRT16	0.0237004	0.0251858	1.71376	1.06934	2.74654
KRT17	0.000122664	0.000191146	2.54192	1.55701	4.14984
KRT20	0.0350493	0.0377138	1.748	1.03222	2.96013
KRT222	0.0120182	0.0133622	1.84147	1.13525	2.987
KRT33B	0.0400044	0.0420214	1.66124	1.01848	2.70964
KRT34	0.00269605	0.00325754	2.05024	1.27088	3.30755
KRT39	0.020935	0.0225288	0.568996	0.350523	0.92364
KRT4	0.00879468	0.00985921	1.86769	1.16214	3.00158
KRT7	0.0250345	0.0267563	1.71155	1.06384	2.75359
KRT71	0.00760127	0.00853231	1.91683	1.18036	3.11283
KRT77	0.0386447	0.0407956	1.7062	1.02262	2.84671
KRT78	0.0158967	0.0172901	1.77702	1.1069	2.85284
KRT79	0.0394133	0.0413478	1.63263	1.01942	2.6147
KRT80	0.00175099	0.00216006	2.11657	1.31086	3.41751
KRT9	0.0396617	0.0413428	1.64923	1.01984	2.66703
KRTAP10-10	0.00813788	0.0126896	3.28667	1.28939	8.37773
KRTAP11-1	0.0337479	0.0358318	1.69937	1.03571	2.78828
KRTAP19-5	0.0190969	0.0236842	2.67635	1.14057	6.28005
KRTAP2-3	0.00724388	0.00817121	1.91115	1.18262	3.08846
KRTAP4-12	0.0018814	0.00791728	7.74063	1.70927	35.0544
KRTAP4-2	3.39018e-07	0.00242914	40.9973	3.7174	452.138
KRTAP4-4	0.0198835	0.0449954	8.20303	1.04808	64.2028
KRTAP4-8	0.0130099	0.0199743	3.44729	1.21547	9.77715
KRTAP5-1	0.00867909	0.00975635	1.90249	1.16811	3.09856
KRTCAP2	0.00213536	0.00264462	2.12254	1.29945	3.46698
KRTCAP3	0.0385624	0.0402418	0.61186	0.382648	0.978373
L1CAM	0.0205883	0.0220196	1.7373	1.08286	2.78724
LACTB2	0.00534937	0.00622244	0.513787	0.31885	0.827904
LAG3	0.0149552	0.0163267	0.553307	0.341344	0.896891
LAMA4	0.00250248	0.00301078	0.482788	0.298417	0.781068
LAMA5	0.00824987	0.00924731	1.88433	1.16938	3.03641
LAMC1	3.67245e-05	6.55437e-05	2.74732	1.67268	4.5124
LAMC2	0.00321584	0.00383738	2.04202	1.25855	3.31322
LAMTOR3	0.0253773	0.0271314	0.582944	0.361189	0.940847
LAMTOR4	0.0160471	0.0172501	0.556264	0.343268	0.901422
LANCL3	0.0222453	0.0239023	1.73624	1.0757	2.8024
LARP6	0.000347524	0.000494363	2.34935	1.45296	3.79876
LASP1	0.00300003	0.00355954	2.02767	1.26056	3.26159
LAT	0.0214355	0.0230087	1.74858	1.08006	2.83089
LAYN	0.000420398	0.000576845	2.34702	1.44395	3.8149
LCE1A	0.00010409	0.00108453	8.32462	2.33517	29.6763
LCE1B	0.000803942	0.00159571	3.45564	1.60015	7.46272
LCE1C	0.000110087	0.000215897	2.92764	1.65718	5.17208
LCE2B	0.00728175	0.018676	5.94166	1.34579	26.2324
LCE3E	0.00517839	0.0148473	6.22339	1.42951	27.0936
LCE4A	0.00207828	0.00883349	7.30685	1.64894	32.3783
LCN1	0.000663352	0.000899927	2.27463	1.40027	3.69494
LCN2	0.0469346	0.0489268	0.615674	0.379921	0.99772
LCTL	0.00223121	0.00271406	2.07432	1.28749	3.34202
LDB2	0.0203485	0.0219984	1.77378	1.0862	2.89662
LDHB	0.0321651	0.0341338	1.66571	1.03892	2.67066
LDLR	6.3815e-05	0.0001142	2.67744	1.62346	4.41569
LDLRAD2	0.000198951	0.000291522	2.51741	1.52767	4.14838
LEFTY1	0.0141192	0.0155133	1.82177	1.12081	2.9611
LEKR1	0.026045	0.0276637	0.582251	0.359783	0.942279
LETMD1	0.029788	0.0315861	0.590801	0.365634	0.954632
LFNG	0.0408807	0.0424953	1.625	1.01657	2.5976
LGALS1	2.80713e-05	5.07852e-05	2.81378	1.70595	4.64103
LGALS14	0.0420882	0.0447503	0.56091	0.318911	0.986542
LGALS8	0.0290109	0.030618	0.588745	0.364213	0.951699
LGI1	0.0415986	0.043303	1.62838	1.01478	2.61301
LHB	0.0196415	0.0209295	1.74058	1.08744	2.78599
LHFPL5	0.00736428	0.00827872	1.89343	1.17884	3.0412
LHX1	6.71592e-05	0.000118526	2.64787	1.61273	4.34744
LHX2	0.0121327	0.0133492	1.82144	1.13275	2.92885
LHX6	0.016565	0.0178675	1.78178	1.10473	2.87378
LHX9	0.028708	0.0304552	1.71342	1.05211	2.7904
LIF	0.00178631	0.00222793	2.10706	1.30685	3.39726
LIG1	3.66828e-08	1.79838e-07	4.06545	2.40085	6.8842
LIG4	0.0406594	0.0426087	0.608112	0.37598	0.983562
LIMK1	0.0209948	0.0225263	1.734	1.08063	2.7824
LIMK2	0.0026758	0.00319468	2.06413	1.275	3.34167
LIMS2	0.00354499	0.00420369	2.01639	1.24746	3.25926
LIN54	0.0368896	0.0387284	1.64178	1.02602	2.62709
LIN7A	0.0194356	0.020898	1.75518	1.08895	2.82902
LINGO4	0.030979	0.0328666	0.592354	0.366169	0.958256
LIPF	0.021887	0.0238047	0.556531	0.334806	0.925093
LIPG	4.29135e-05	8.00419e-05	2.7246	1.65575	4.48342
[truncated: 2,042 more rows]
