# Supplementary material for: Metabolomics of a cell line-derived xenograft model reveals circulating metabolic signatures for malignant mesothelioma
Source: PeerJ. 2022 Jan 4;10:e12568. doi: 10.7717/peerj.12568 (PMC8740518; doi:10.7717/peerj.12568)
Supplement: Supplemental Information 7 [file peerj-10-12568-s007.xlsx]

## Sheet: file explanation
表头名称	描述
id	该物质在本次定性分析中的唯一数据编号
Peak	定性分析得到的物质名称
Similarity	定性分析中该物质与标准库中物质的匹配程度，取值[0, 1000], 越高说明定性出的物质越准确
rt	该物质的色谱保留时间
Count	该物质在所有实验组中检测到的次数
Mass	物质特征离子的质荷比
Ren6_1	Ren6_1样品相对定量值
Ren4_1	Ren4_1样品相对定量值
Ren2_1	Ren2_1样品相对定量值
Ren7_1	Ren7_1样品相对定量值
Ren8_1	Ren8_1样品相对定量值
Ren9_1	Ren9_1样品相对定量值
Ren5_1	Ren5_1样品相对定量值
Ren1_1	Ren1_1样品相对定量值
Ren3_1	Ren3_1样品相对定量值
Ren10_1	Ren10_1样品相对定量值
Mean A	A样本重复实验的相对定量值均值
Ren-NC1_1	Ren-NC1_1样品相对定量值
Ren-NC5_1	Ren-NC5_1样品相对定量值
Ren-NC9_1	Ren-NC9_1样品相对定量值
Ren-NC3_1	Ren-NC3_1样品相对定量值
Ren-NC7_1	Ren-NC7_1样品相对定量值
Ren-NC4_1	Ren-NC4_1样品相对定量值
Ren-NC6_1	Ren-NC6_1样品相对定量值
Ren-NC2_1	Ren-NC2_1样品相对定量值
Ren-NC8_1	Ren-NC8_1样品相对定量值
Ren-NC10_1	Ren-NC10_1样品相对定量值
Mean B	B样本重复实验的相对定量值均值
QC1-1_1	QC1-1_1样品相对定量值
QC1-2_1	QC1-2_1样品相对定量值
QC1-3_1	QC1-3_1样品相对定量值
QC2_1	QC2_1样品相对定量值
QC3_1	QC3_1样品相对定量值
Mean QC	QC样本重复实验的相对定量值均值

## Sheet: Mean
id	Peak	Similarity	rt	Count	Mass	Ren6_1	Ren4_1	Ren2_1	Ren7_1	Ren8_1	Ren9_1	Ren5_1	Ren1_1	Ren3_1	Ren10_1	Mean A	Ren-NC1_1	Ren-NC5_1	Ren-NC9_1	Ren-NC3_1	Ren-NC7_1	Ren-NC4_1	Ren-NC6_1	Ren-NC2_1	Ren-NC8_1	Ren-NC10_1	Mean B	QC1-1_1	QC1-2_1	QC1-3_1	QC2_1	QC3_1	Mean QC
1	Analyte 1	0	4.71983,0	24	176	0.161415	0.168173	0.136019	0.113327	0.150057	0.129868	0.162977	0.121098	0.103656	4.91404e-07	0.124659	0.12961	0.162769	0.19054	0.170324	0.203703	0.0890465	0.203556	0.133546	0.173671	0.199817	0.165658	0.0485258	0.0728087	0.0766664	0.0800216	4.84689e-07	0.0556046
5	Analyte 5	0	4.73909,0	25	163	0.0999813	0.12603	0.0942327	0.0724796	0.10064	0.0711466	0.101469	0.0723483	0.0684568	4.91404e-07	0.0806785	0.115374	0.118182	0.10533	0.146767	0.123946	0.0513536	0.103499	0.0942198	0.130853	0.109275	0.10988	0.0610082	0.0812945	0.0847209	0.0864844	0.0895014	0.0806019
6	Analyte 6	0	4.74689,0	18	190	0.000341176	0.000533298	0.000297538	0.000285635	0.000350023	5.34049e-07	0.000440625	4.47719e-07	0.000226779	4.91404e-07	0.000247655	0.000421713	0.000453984	0.000362524	0.000558481	0.000501157	4.7977e-07	6.05777e-07	5.12616e-07	4.95477e-07	0.000384217	0.000268417	0.000223451	0.00034931	0.000374942	0.000317432	4.84689e-07	0.000253124
8	Analyte 8	0	4.75515,0	25	144	0.00313284	0.0044004	0.00245236	0.00258085	0.00314837	0.00168835	0.00386812	0.00209535	0.00183211	0.000846514	0.00260453	0.00461409	0.00433275	0.003223	0.00444287	0.00466849	0.00153175	0.00260327	0.00333509	0.00472112	0.00312669	0.00365991	0.00220766	0.00277072	0.00299411	0.00204934	0.00205459	0.00241529
10	Analyte 12	0	4.77605,0	25	281	0.0078498	0.00980843	0.0051084	0.00530306	0.00541493	0.00759688	0.00791531	0.0032756	0.00390379	4.91404e-07	0.00561767	0.00868119	0.00808128	0.00675972	0.0112221	0.00955827	0.00315276	0.00685425	0.00685416	0.00951595	0.00720916	0.00778889	0.0107506	0.012455	0.0156465	0.011638	0.0121998	0.012538
11	Analyte 13	0	4.78386,0	19	204	0.00414723	4.67764e-07	0.0032333	0.00288932	5.20543e-07	0.00308406	5.22327e-07	0.00196408	0.00240564	0.000996514	0.00187216	0.00423258	0.00412745	0.00318998	5.40238e-07	0.00490256	0.00127525	0.00352602	5.12616e-07	0.00474029	0.00376057	0.00297557	0.00355174	0.0040015	5.04078e-07	5.04078e-07	0.00374643	0.00226013
12	Analyte 14	0	4.788,0	25	220	0.00548067	0.00707268	0.00419567	0.00381467	0.00399862	0.00471978	0.00581619	0.00211343	0.00328839	0.00175013	0.00422502	0.00803149	0.00718403	0.00479961	5.40238e-07	0.00651602	0.00272857	0.00550871	0.0064824	0.0063428	0.0048667	0.00524609	0.0052968	0.00605328	0.00680316	0.00543058	0.00605458	0.00592768
13	Analyte 15	0	4.79659,0	25	221	0.0963355	0.0999896	0.0494337	0.0599774	0.0771001	0.0854725	0.0952343	0.0295016	0.0463455	0.0235391	0.0662929	0.122852	0.111797	0.0654297	0.116227	0.0989913	0.0415191	0.102289	0.0841098	0.101127	0.0701381	0.0914479	0.0628916	0.0807239	0.0942792	0.112631	0.165178	0.103141
14	Analyte 16	0	4.80421,0	25	102	0.0137061	0.0229041	0.0115485	0.0124295	0.0104404	0.0271205	0.0181719	0.00615757	0.00711924	4.91404e-07	0.0129598	0.0159518	0.0159915	0.0126909	0.0196437	0.0256596	0.00469378	0.0171795	0.017324	0.0241241	0.022564	0.0175823	0.0120138	0.0171529	0.0210379	0.017052	0.0166206	0.0167754
15	Analyte 17	0	4.814,0	20	83	0.0127395	0.0169621	0.00705963	0.0126634	0.00850594	0.0141361	0.0163631	0.00494127	4.19214e-07	0.00351438	0.00968859	0.018592	0.0178902	0.0109732	5.40238e-07	7.21909e-07	0.00449786	6.05777e-07	0.0153914	0.0184306	4.91404e-07	0.00857777	0.0209433	0.0207526	0.0261613	0.0166324	0.019863	0.0208705
16	Analyte 18	0	4.82101,0	25	159	0.0150406	0.0159966	0.00554057	0.00887341	0.0103664	0.0112062	0.0137085	0.0058169	0.00423561	0.00301983	0.00938047	0.0164382	0.0205679	0.0112563	0.0210342	0.0152993	0.00417815	0.00952077	0.0140196	0.0201407	0.0131557	0.0145611	0.019531	0.0184408	0.023702	0.0195478	0.0191585	0.020076
17	Analyte 19	0	4.83051,0	25	147	0.0184807	0.014207	0.00375395	0.0094998	0.00361352	0.011913	0.0127687	0.00336257	0.00251127	0.00147824	0.00815887	0.0219634	0.0150429	0.00810595	0.0239711	0.01493	0.00280662	0.00569548	0.0143324	0.0171798	0.0121717	0.0136199	0.0120741	0.0130906	0.0160066	0.01416	0.0122467	0.0135156
18	Analyte 20	0	4.83685,0	11	140	4.77128e-07	4.67764e-07	4.39935e-07	4.24611e-07	5.20543e-07	5.34049e-07	5.22327e-07	0.000423392	0.000322587	4.91404e-07	7.49857e-05	4.85981e-07	0.00157727	0.000824773	0.00163273	0.00150148	4.7977e-07	6.05777e-07	5.12616e-07	0.00181368	0.00120292	0.000855494	0.000414683	0.00050822	5.04078e-07	5.04078e-07	0.000568316	0.000298445
19	Analyte 21	0	4.84453,0	25	57	0.0483223	0.0547033	0.0225828	0.0472708	0.0216127	0.0518454	0.0623721	0.0193302	0.0150351	0.0124413	0.0355516	0.0680158	0.0491011	0.0322304	0.0643508	0.0820005	0.0119847	0.0267007	0.0616924	0.0613553	0.0519206	0.0509352	0.0544129	0.058561	0.0603272	0.0584423	0.0579273	0.0579341
21	Analyte 23	0	4.86091,0	25	58	0.0488521	0.0669794	0.0306039	0.04525	0.0251677	0.0508323	0.0829306	0.0194611	0.0170271	0.0123162	0.0399421	0.0878071	0.0608485	0.0326437	0.0887291	0.0966622	0.0182691	0.0288362	0.0681821	0.0535293	0.0464104	0.0581918	0.0488611	0.0623648	0.0626329	0.0639088	0.0626639	0.0600863
22	Analyte 24	0	4.86875,0	25	155	0.00225704	0.00314004	0.000983413	0.00170526	0.00119972	0.00212284	0.00242831	0.000662603	0.000649075	0.000468667	0.0015617	0.00344205	0.0028916	0.00116185	0.00288944	0.0031794	0.000608497	0.00108441	0.00243392	0.0026621	0.00231766	0.00226709	0.00237229	0.0027072	0.002907	0.00311247	0.00290379	0.00280055
23	Analyte 25	0	4.88481,0	23	147	0.00150774	0.00253114	0.00140626	0.00311099	0.00119347	0.00403431	0.00175098	0.000516505	0.000444319	4.91404e-07	0.00164962	0.00286917	0.00293698	0.00108686	0.00258087	0.00561906	4.7977e-07	0.0012399	0.00197372	0.00199016	0.00219506	0.00224922	0.00344659	0.002252	0.00156195	0.0017298	0.00195181	0.00218843
24	Analyte 26	0	4.89545,0	22	207	0.000641144	0.000811439	0.000555045	4.24611e-07	0.000322274	0.00125936	0.000679533	0.000240134	0.000294346	0.000319863	0.000512356	0.00101417	0.00168013	0.000875015	0.0013642	0.00163718	4.7977e-07	0.000922531	0.00106956	0.00120049	0.00116607	0.00109298	0.001021	0.000610948	5.04078e-07	0.000883581	4.84689e-07	0.000503303
26	Analyte 28	0	4.91473,0	22	117	4.77128e-07	0.0064152	0.00238031	0.00312222	5.20543e-07	0.00392641	0.00468322	0.00205315	0.00144253	0.000812391	0.00248364	0.00785353	0.00654613	0.00219847	0.00919166	0.00539851	0.00182115	0.00261821	0.00590425	0.00447707	0.00365093	0.00496599	0.00610019	0.00724796	0.00719977	5.04078e-07	0.00693988	0.00549766
28	Analyte 30	0	4.92679,0	22	175	0.000615676	0.00160448	0.000569933	0.000947787	5.20543e-07	0.00115936	0.0013631	4.47719e-07	0.000395804	0.000313788	0.00069709	0.00212839	5.02499e-07	0.000645203	0.00143896	0.00169712	0.000307566	0.000549127	0.0012087	0.00187661	0.00112317	0.00109754	0.00369291	0.00478098	0.0050314	0.0055818	0.00580732	0.00497888
29	Analyte 31	0	4.93141,0	25	281	0.0159963	0.03491	0.0114986	0.0170265	0.00985222	0.0211447	0.0235441	0.0082032	0.00703864	0.00514769	0.0154362	0.0346348	0.0298858	0.0145601	0.0268701	0.0292599	0.00628234	0.0127089	0.0220046	0.0329572	0.0242155	0.0233379	0.0314613	0.0261357	0.0243445	0.0190509	0.0187944	0.0239573
30	Analyte 32	0	4.95941,0	25	93	0.00855593	0.0257971	0.00850121	0.0129664	0.00651301	0.0213006	0.0189965	0.00546854	0.00473013	0.00430681	0.0117136	0.0284923	0.0178148	0.0101087	0.0214493	0.0256998	0.00460477	0.00656984	0.019415	0.02095	0.0151974	0.0170302	0.023736	0.0269466	0.0256827	0.022415	0.0231702	0.0243901
32	Analyte 34	0	4.96421,0	25	248	0.00774869	0.0184847	0.00542568	0.00931505	0.0056811	0.0120314	0.01302	0.00459057	0.00380839	0.00159508	0.00817006	0.0200996	0.016768	0.00781258	0.0168142	0.0163169	0.00368912	0.00644762	0.0128211	0.0190162	0.0133864	0.0133172	0.00546746	0.00661343	0.00684074	0.00575822	0.0065517	0.00624631
33	Analyte 35	0	4.97403,0	25	56	0.011796	0.023999	0.00845858	0.016253	0.00784073	0.0207964	0.0213606	0.00721088	0.00601759	0.00566865	0.0129401	0.0265915	0.0187631	0.0112135	0.0243188	0.0276144	0.0056066	0.00874917	0.0223619	0.024909	0.0148843	0.0185012	0.0224187	0.0267492	0.0271938	0.0235882	0.0273464	0.0254593
36	Analyte 38	0	5.01049,0	23	111	0.00161061	0.00477235	0.00127978	4.24611e-07	0.00143097	0.00137702	0.00334379	0.00117631	0.00108502	0.000934498	0.00170108	0.00516345	0.00349143	0.00148136	5.40238e-07	0.00395931	0.00109658	0.00153225	0.00338412	0.00482824	0.00280779	0.00277451	0.00430299	0.00480193	0.00497952	0.00446586	0.00535408	0.00478088
37	Analyte 39	0	5.01584,0	25	204	0.00146033	4.67764e-07	0.00126129	0.00186814	0.00116255	0.0010283	0.00248016	0.00106498	0.00102255	0.000567981	0.00119167	0.0030548	0.00200624	0.00119621	0.00225663	0.00293965	0.000575931	0.00113525	0.00171847	0.00349277	0.00234742	0.00207234	0.00213966	0.00269158	0.00281387	0.00247249	0.00300658	0.00262484
39	Analyte 41	0	5.02673,0	20	207	0.00115971	0.00477885	0.000767295	0.00172204	0.0011434	0.00110356	0.00202184	0.000771284	0.000753532	0.000346156	0.00145677	0.00435583	0.00300157	0.00132951	0.00336724	7.21909e-07	4.7977e-07	6.05777e-07	0.00223277	0.00439506	0.002587	0.00212708	5.40823e-07	0.00193752	0.00187597	5.04078e-07	0.00211814	0.00118653
40	Analyte 42	0	5.03728,0	25	160	0.0230261	4.67764e-07	0.0145467	0.0234414	0.0142673	0.0131696	0.0320766	0.0119301	0.0109662	0.000974934	0.01444	0.0497768	0.0339882	0.0155212	0.0457275	0.0442883	0.00972626	0.0143364	0.0307919	0.0504467	0.0282316	0.0322835	0.0666445	0.0642239	0.0598939	0.0440972	0.0573321	0.0584383
41	Analyte 43	0	5.06256,0	25	248	0.0581503	0.0953492	0.0251037	0.0448431	0.0313561	0.0358515	0.0645417	0.0232655	0.0206428	0.00273161	0.0401836	0.0917856	0.0944011	0.0395059	0.0878568	0.0757696	0.024483	0.0328946	0.0647452	0.100131	0.0651932	0.0676766	0.0293727	0.0340635	0.035418	0.0304087	0.0329607	0.0324447
43	Analyte 45	0	5.06965,0	25	147	0.317401	0.410957	0.126724	0.238161	0.143455	0.219097	0.391988	0.114399	0.109233	0.020562	0.209198	0.449526	0.444496	0.183297	0.457797	0.447998	0.115601	0.180194	0.36862	0.500805	0.337789	0.348612	0.399786	0.458526	0.476218	0.417721	0.471037	0.444657
45	Analyte 47	0	5.10294,0	24	147	0.0133986	0.0241992	0.0083989	0.00618804	0.00844962	0.0079628	0.0164716	0.0064702	0.00738075	0.00493816	0.0103858	4.85981e-07	5.02499e-07	0.00631799	0.023149	0.0118575	0.0065881	0.0148987	0.0153584	0.0307709	0.0192177	0.0128159	0.0199805	0.0307162	0.0329144	0.0280881	0.0331414	0.0289681
46	Analyte 48	0	5.10494,0	24	57	0.060853	0.117464	0.0358162	4.24611e-07	0.0355777	0.0469215	0.0896036	0.0309378	0.028136	0.0200882	0.0465399	0.136702	0.137005	0.0314088	0.100811	0.0730551	0.0293915	0.0438402	0.0839209	0.140068	0.082928	0.0859131	0.104425	0.127183	0.129497	0.13421	0.145006	0.128064
47	Analyte 49	0	5.12528,0	25	207	0.0838567	0.141387	0.0351037	0.0335437	0.0415073	0.0404448	0.0920452	0.0279827	0.030401	0.0173327	0.0543605	0.165555	0.15945	0.0365414	0.133456	0.0593043	0.0353599	0.0442844	0.0922572	0.167174	0.0904783	0.098386	0.14173	0.139844	0.123964	0.0967544	0.110337	0.122526
48	Analyte 50	0	5.13884,0	23	93	0.10052	0.160071	0.0474504	0.0411686	0.0482738	0.0484037	0.120588	0.0392727	0.0385036	0.0282423	0.0672495	0.169735	5.02499e-07	0.0423736	0.150526	7.21909e-07	0.0425673	0.0540129	0.118175	0.177723	0.0996973	0.0854812	0.139464	0.173205	0.175331	0.159734	0.175334	0.164614
50	Analyte 52	0	5.14523,0	25	71	0.0598365	0.0751869	0.0268481	0.0230171	0.0267535	0.0283938	0.0772341	0.0217276	0.0211257	0.0156393	0.0375763	0.0527501	0.086325	0.0226868	0.0700069	0.0409132	0.0217062	0.0277801	0.0761362	0.0934005	0.0495122	0.0541217	0.0716739	0.0926919	0.0914133	0.0822527	0.094137	0.0864338
51	Analyte 53	0	5.15719,0	19	318	4.77128e-07	4.67764e-07	0.00597187	0.00543536	5.20543e-07	5.34049e-07	0.0129221	0.00532425	0.00484078	0.00122294	0.00357193	0.0219942	0.0246535	5.15058e-07	0.0216077	0.00983643	0.00570681	0.00766807	5.12616e-07	0.0260852	0.0143058	0.0131859	0.010327	0.0128006	0.0131378	0.0116143	0.014296	0.0124351
52	Analyte 56	254	5.17525,0	25	150	0.00477379	0.00634023	0.00158323	0.00134401	0.00152842	0.0016402	0.00341785	0.00126046	0.00149987	0.000682463	0.00240705	0.00458535	0.00589123	0.00162431	0.00655585	0.00266564	0.00142283	0.00253575	0.00304218	0.00500343	0.00312053	0.00364471	0.00490338	0.00646955	0.00672507	0.00825669	0.0125482	0.00778058
54	Analyte 58	805	5.20218,0	19	117	0.0016923	0.00122322	0.000989965	0.00397355	5.20543e-07	5.34049e-07	0.00105926	0.00115593	0.000738772	4.91404e-07	0.00108345	0.00325722	0.00366849	5.15058e-07	5.40238e-07	7.21909e-07	0.00192665	0.000888432	0.00230499	0.000977069	4.91404e-07	0.00130251	0.00248854	0.00269459	0.00246487	0.00231032	0.00283276	0.00255822
56	Analyte 60	230	5.21878,0	24	221	0.00251762	0.00332199	0.00075696	0.000756321	0.00106536	0.000909698	0.00153371	0.000677165	0.000689039	4.91404e-07	0.00122284	0.00314579	0.00368637	0.00104462	0.0032175	0.00127668	0.000710339	0.000970747	0.00149146	0.00343642	0.00193548	0.00209154	0.00290011	0.00348189	0.00352	0.00327626	0.0036782	0.00337129
57	2-hydroxypyridine	903	5.23077,0	25	152	0.277692	0.360224	0.107492	0.0865235	0.111963	0.11363	0.199778	0.0847442	0.0835655	0.0511116	0.147672	0.378394	0.397632	0.11459	0.35475	0.164448	0.0891175	0.138926	0.165785	0.395728	0.227787	0.242716	0.287831	0.32138	0.317923	0.302864	0.335172	0.313034
58	unknown	493	5.23988,0	23	218	0.00218198	0.00359918	0.000983	0.000735043	0.00101693	0.000856853	0.00181627	0.000825739	0.000725501	0.000431442	0.00131719	0.00363788	0.00376575	0.00103117	0.00332466	0.00125039	0.000893076	0.000939879	0.00161372	0.00305326	0.00163098	0.00211408	5.40823e-07	0.00224842	0.00245317	5.04078e-07	0.00255698	0.00145192
59	Analyte 64	0	5.252,0	25	207	0.0675555	0.074394	0.0192952	0.0161275	0.0206997	0.0225009	0.0405941	0.0142132	0.0182259	0.0100043	0.030361	0.0897683	0.0861419	0.0235813	0.0660922	0.0302493	0.0184076	0.0225747	0.0294406	0.0811229	0.0640249	0.0511404	0.164699	0.114526	0.0889903	0.06879	0.0705164	0.101504
60	Pyruvic acid	918	5.26507,0	25	174	0.101092	0.176757	0.0959406	0.0429169	0.0450281	0.040959	0.142998	0.0466804	0.0497464	0.027733	0.0769851	0.264675	5.02499e-07	0.0524181	0.209081	0.126589	0.0679789	0.076862	0.0620939	0.255605	0.126653	0.124196	0.181808	0.223843	0.234371	0.222018	0.236921	0.219792
61	unknown	428	5.27061,0	23	102	0.019479	0.0238573	0.00857531	0.0058413	0.00640268	0.00702852	0.0203462	0.00584361	0.00636967	0.00567791	0.0109422	4.85981e-07	0.0321303	0.00735134	0.0243313	0.0131887	0.00676749	0.00789583	0.0118582	0.0258271	0.0149368	0.0144288	0.0292989	0.0317161	0.032109	0.0266214	4.84689e-07	0.0239492
62	Analyte 67	0	5.28229,0	25	68	0.00865294	0.0112216	0.00410726	0.00344041	0.00348666	0.00407035	0.00967227	0.00241823	0.00285496	0.00201309	0.00519378	0.0135964	0.0143889	0.00417917	0.0113647	0.00720359	0.00347196	0.00396054	0.0062155	0.0140463	0.00937419	0.00878013	0.0125083	0.0147807	0.0147822	0.0134814	0.0146696	0.0140444
63	Analyte 68	0	5.30749,0	13	211	4.77128e-07	0.00128411	4.39935e-07	4.24611e-07	5.20543e-07	0.00059517	5.22327e-07	4.47719e-07	4.19214e-07	4.91404e-07	0.000188302	0.00225522	2.07802e-05	5.15058e-07	0.00278754	7.21909e-07	4.7977e-07	6.05777e-07	0.00200095	0.00243652	0.00135677	0.00108601	0.0036016	0.00578456	0.00630811	0.00677643	0.00773129	0.0060404
66	lactic acid	942	5.34848,0	25	66	0.789186	0.840022	1.45601	1.01922	0.773449	0.829195	1.47718	1.04709	0.965614	0.9866	1.01836	1.23812	1.10919	0.809749	1.15442	7.21909e-07	1.21798	1.17454	0.965402	1.03083	0.811515	0.951174	1.05167	1.03831	1.0409	1.0522	1.04687	1.04599
71	unknown	427	5.38459,0	25	190	0.0054601	4.67764e-07	0.00517835	0.00418125	0.00779186	0.00874336	0.00666516	0.00658668	0.00766398	4.91404e-07	0.00522717	0.019211	0.0349162	0.00707914	0.0198025	0.00822299	0.00637348	0.0181489	0.0225676	0.0387637	0.0187068	0.0193792	0.035871	0.0467848	0.0480972	0.0723493	0.0792449	0.0564695
72	Analyte 80	378	5.39275,0	23	225	0.011462	4.67764e-07	0.00993064	0.00805916	0.0142626	0.0139879	0.00882174	0.0110822	0.00947851	4.91404e-07	0.00870857	0.0303274	5.02499e-07	0.0130132	0.0249245	0.0167698	4.7977e-07	0.0273752	0.0289755	4.95477e-07	0.0328266	0.0174214	0.0468883	0.0499186	0.0478862	0.0463798	0.0382704	0.0458687
74	2-ketobutyric acid 2	339	5.42699,0	25	71	0.0248517	4.67764e-07	0.0163994	0.0150121	0.0326957	0.0307233	0.019256	0.0203822	0.0180127	0.0203223	0.0197656	0.0369832	0.0618634	0.0291035	0.017328	0.0273266	0.014778	0.0442434	0.0524259	4.95477e-07	0.0324495	0.0316502	0.134908	0.119325	0.0923487	0.114347	0.0892699	0.11004
75	glycolic acid	921	5.44987,0	25	147	0.0265182	4.67764e-07	0.0209792	0.0172038	0.0316598	0.0293329	0.0230167	0.0256174	0.0265468	0.0207609	0.0221636	0.0535645	5.02499e-07	0.0279837	0.0241029	0.0302109	0.0218397	0.0514984	0.0605434	4.95477e-07	0.0441714	0.0313916	0.16611	0.167705	0.155912	0.158824	0.149671	0.159644
77	Analyte 85	0	5.46496,0	25	173	0.00165828	4.67764e-07	0.0012662	0.00118232	0.00267802	0.00209837	0.00134266	0.00167622	0.0014354	0.0015965	0.00149344	0.00295309	0.00516531	0.00213731	0.00143121	0.00183553	0.00133404	0.0035126	0.00353899	4.95477e-07	0.00367957	0.00255882	0.013843	0.0110229	0.00990467	0.0120637	0.00996275	0.0113594
80	Analyte 88	0	5.50827,0	25	57	0.00189075	4.67764e-07	0.00144647	0.0012463	0.0025272	0.00250542	0.00625524	0.0020057	0.00176787	0.00194535	0.00215908	0.00239135	0.00200944	0.00220313	0.00169563	0.00245233	0.00097976	0.00403468	0.00485259	0.00593143	4.91404e-07	0.00265508	0.0107252	0.00843649	0.00834711	0.00760942	0.00481162	0.00798597
81	Analyte 89	0	5.53461,0	22	147	0.00398179	4.67764e-07	0.00279333	0.00182157	0.00334617	0.00382696	5.22327e-07	0.00133643	0.00306425	0.00383437	0.00240059	0.00412081	5.02499e-07	0.00384644	0.00288473	0.00293454	4.7977e-07	0.00595698	5.12616e-07	4.95477e-07	4.91404e-07	0.0019746	0.0159103	0.0123118	0.0260477	0.0221623	0.00929216	0.0171449
82	Analyte 90	0	5.52411,0	24	163	0.00173042	4.67764e-07	0.00120761	0.00110819	0.00218629	0.00216651	0.00630182	0.00182207	0.00160058	4.91404e-07	0.00181245	0.00200018	0.00224489	0.00201604	0.00163324	0.00212816	0.00116402	0.00366741	0.00462735	4.95477e-07	4.91404e-07	0.00194823	0.00418009	0.00518159	0.00537261	0.00604266	0.00261849	0.00467909
83	Analyte 91	0	5.54597,0	25	69	0.0121068	4.67764e-07	0.00777961	0.00606147	0.0127159	0.0134311	5.22327e-07	0.0112826	0.0100075	0.00921604	0.00826021	0.0104031	0.0118598	0.0105696	0.0108223	0.0102521	0.00697279	0.0197582	0.0278237	0.025235	0.0240668	0.0157763	0.0601549	0.0555008	0.0527992	0.0506383	0.0248089	0.0487804
87	Analyte 95	0	5.60555,0	25	151	0.000845564	4.67764e-07	0.000342753	0.000349367	0.000777023	0.000885096	5.22327e-07	0.00060644	0.000595405	0.000126607	0.000452924	0.000607288	0.000460702	0.000972839	0.000559192	0.000988472	0.000309599	0.0012447	0.00158043	4.95477e-07	0.00124707	0.000797078	0.00542007	0.00599258	0.00574043	0.00641358	0.0027953	0.00527239
88	Analyte 96	225	5.61308,0	16	84	0.000431136	4.67764e-07	4.39935e-07	4.24611e-07	0.000587367	0.000557335	5.22327e-07	0.000419778	0.000314952	4.91404e-07	0.000231291	4.85981e-07	5.02499e-07	0.000505505	0.000449942	7.21909e-07	0.000321012	0.000709104	0.000869684	4.95477e-07	0.000636496	0.000349395	0.00247267	0.00218802	0.00187935	5.04078e-07	4.84689e-07	0.00130821
90	alanine 1	971	5.65403,0	25	116	0.386206	4.67764e-07	0.235022	0.159922	0.251175	0.188284	0.327971	0.283169	0.209397	0.147745	0.218889	0.309557	0.33009	0.233624	0.348462	0.305951	0.310503	0.399064	5.12616e-07	4.95477e-07	0.290722	0.252797	0.851777	0.941889	0.968547	0.964241	0.662998	0.87789
91	Analyte 100	177	5.66533,0	24	71	0.0123033	4.67764e-07	0.00775116	0.00651526	0.0118712	0.0103824	0.00644732	0.00810425	0.00671965	0.00749931	0.00775943	0.00849952	0.0081609	0.0100165	0.00964752	0.0114724	0.00816798	0.0151692	5.12616e-07	4.95477e-07	0.0130965	0.00842315	5.40823e-07	0.0542384	0.0511071	0.0492694	0.0263362	0.0361903
93	Analyte 102	278	5.68501,0	25	187	0.000818734	4.67764e-07	0.000513657	0.000411541	0.000800422	0.000663753	0.000506102	0.00056251	0.000385976	0.000522861	0.000518602	0.000631846	0.000429731	0.000674107	0.000619824	0.000752606	0.000467326	0.000974606	5.12616e-07	4.95477e-07	0.000975471	0.000552653	0.00411667	0.00401968	0.00433175	0.00411693	0.00185206	0.00368742
94	2-keto-isovaleric acid 1	449	5.69525,0	25	89	0.00176061	4.67764e-07	0.00137252	0.000970602	0.00194006	0.00152931	0.00112801	0.00136583	0.00100856	0.00147879	0.00125548	0.00135285	0.000932878	0.00176522	0.00148701	0.00211933	0.00101206	0.00261395	5.12616e-07	4.95477e-07	0.00251704	0.00138013	0.0134474	0.0120466	0.012047	0.0117066	0.00573857	0.0109972
95	Analyte 104	191	5.70741,0	25	71	0.0528047	4.67764e-07	0.0301705	0.0285054	0.0549225	0.0496276	0.0373159	0.0320791	0.0274348	0.033126	0.0345987	0.0306381	0.0209441	0.0468459	0.0374143	0.0516372	0.0276112	0.0636299	5.12616e-07	4.95477e-07	0.0587249	0.0337447	0.304406	0.260078	0.259554	0.243486	0.144131	0.242331
96	Analyte 105	0	5.71122,0	17	146	4.77128e-07	4.67764e-07	0.000326862	4.24611e-07	0.000453252	5.34049e-07	5.22327e-07	0.000292036	4.19214e-07	4.91404e-07	0.000107549	0.000369071	0.00027087	0.000512061	0.000452273	7.21909e-07	0.000263054	0.000542384	5.12616e-07	4.95477e-07	0.000529781	0.000294122	0.00245026	0.00207189	0.00204131	0.00165307	0.0016446	0.00197222
99	unknown	239	5.75008,0	25	71	0.019618	4.67764e-07	0.0107527	0.0102557	0.0196609	0.0181943	0.0136784	0.0115505	0.00937959	0.0121947	0.0125285	0.0103307	0.011492	0.0172602	0.0133138	0.0184311	0.0105459	0.0231651	5.12616e-07	4.95477e-07	0.0205614	0.0125101	0.113507	0.107742	0.0993683	0.0968518	0.0666941	0.0968327
100	Analyte 109	325	5.75899,0	25	116	0.0301551	4.67764e-07	0.0141877	0.0129956	0.0294668	0.0278058	0.0174945	0.0152634	0.0131305	0.0131598	0.017366	0.0156507	0.0212844	0.0281703	0.0204839	0.0255679	0.0157973	0.0344546	5.12616e-07	4.95477e-07	0.0334441	0.0194854	0.168774	0.168467	0.157987	0.169123	0.120905	0.157051
101	Analyte 110	258	5.78027,0	25	245	0.00727922	4.67764e-07	0.00388093	0.00330018	0.00724974	0.00655959	0.00522761	0.00348898	0.00365696	0.00643954	0.00470832	0.00385299	0.00406062	0.00633863	0.00543545	0.00548021	0.00412712	0.0149946	5.12616e-07	4.95477e-07	0.0083224	0.00526131	0.0225305	0.0412443	0.0376314	0.0406815	0.034234	0.0352643
102	glycine 1	863	5.79797,0	25	102	0.218587	4.67764e-07	0.119076	0.084067	0.126869	0.0992619	0.143248	0.167277	0.0919883	0.0992772	0.114965	0.106165	0.127049	0.164669	0.0889084	0.152802	0.0705234	0.14352	0.23159	4.95477e-07	0.127178	0.121241	0.0500104	0.0886328	0.0750973	0.0530342	0.0325854	0.059872
103	octanal 1	223	5.80677,0	25	71	0.0162739	4.67764e-07	0.00935641	0.00842487	0.015737	0.0150823	0.0112155	0.00929206	0.00806816	0.0100375	0.0103488	0.00666899	0.0100228	0.0150606	0.0108674	0.0148064	0.00912595	0.0188156	5.12616e-07	4.95477e-07	0.0162139	0.0101583	0.0432373	0.08198	0.0854242	0.0830367	0.0519164	0.0691189
104	2-hydroxybutanoic acid	881	5.82111,0	18	131	4.77128e-07	0.000313257	0.00346384	4.24611e-07	0.00402099	5.34049e-07	0.00300586	4.47719e-07	0.0021665	0.0027368	0.00157091	0.00344638	0.00317423	5.15058e-07	0.0135697	7.21909e-07	0.0122315	0.0105855	5.12616e-07	0.000301757	4.91404e-07	0.00433113	0.0155808	0.0328039	0.0364232	0.0327564	0.0277768	0.0290682
106	Analyte 116	262	5.83007,0	20	206	0.000504514	4.67764e-07	4.39935e-07	0.000232374	5.20543e-07	5.34049e-07	0.000300195	4.47719e-07	0.000304848	0.000310296	0.000165464	0.000326176	0.000368141	0.000544918	0.000696101	7.21909e-07	0.000450786	0.000697007	5.12616e-07	4.95477e-07	0.00061564	0.00037005	0.00115887	0.00207957	0.00275651	0.00240313	0.0022624	0.0021321
107	Analyte 117	0	5.84933,0	17	267	0.000389506	4.67764e-07	6.80701e-05	4.24611e-07	0.000203876	0.000231754	0.000137891	4.47719e-07	4.19214e-07	4.91404e-07	0.000103335	0.000194255	5.02499e-07	0.000156822	0.000218328	7.21909e-07	4.7977e-07	0.000150717	5.12616e-07	4.95477e-07	0.000242403	9.65238e-05	0.0022817	0.00351417	0.0051705	0.00364659	0.0043764	0.00379787
108	oxalic acid	809	5.85333,0	24	147	0.0022555	4.67764e-07	0.00152708	0.00113307	0.00212324	0.00204392	0.0018472	0.00140963	0.0011841	4.91404e-07	0.00135247	0.00106976	0.000659377	0.00274532	0.00136833	0.00190158	0.00123076	0.00246744	0.00117957	4.95477e-07	0.00293758	0.00155602	0.00436175	0.00901845	0.0114926	0.00970861	0.0155362	0.0100235
110	Analyte 121	352	5.89374,0	13	145	0.000555303	4.67764e-07	0.000459415	4.24611e-07	0.000676322	0.000750346	5.22327e-07	4.47719e-07	0.000402814	4.91404e-07	0.000284655	4.85981e-07	5.02499e-07	0.000589549	5.40238e-07	0.000621909	4.7977e-07	0.000714022	5.12616e-07	4.95477e-07	0.000651754	0.000258025	0.00364203	0.00376975	5.04078e-07	0.00380374	0.00330138	0.00290348
113	Analyte 126	0	5.92469,0	25	267	0.00280101	4.67764e-07	0.00112634	0.00106154	0.00267316	0.00189391	0.00171065	0.000910691	0.000951448	0.000970553	0.00140998	0.000822691	0.0035673	0.00229115	0.00169335	0.00186195	0.000924518	0.00253462	0.00136414	4.95477e-07	0.00234162	0.00174018	0.00728311	0.010126	0.0109562	0.0103772	0.00834974	0.00941845
114	unknown	475	5.945,0	16	177	0.00284108	0.000903587	4.39935e-07	4.24611e-07	5.20543e-07	0.00296473	0.00301078	0.00332964	4.19214e-07	8.1199e-06	0.00130597	4.85981e-07	0.00530285	0.00276945	5.40238e-07	7.21909e-07	0.00312982	6.05777e-07	0.00353303	0.000922909	4.91404e-07	0.00156609	0.000753269	0.00856742	0.00765236	0.000501005	0.00526399	0.00454761
115	3-Hydroxypropionic acid 1	479	5.9472,0	25	73	3.24316	3.77441	3.11215	2.84128	3.25179	3.33289	3.79915	3.02477	2.45207	2.09495	3.09266	1.80775	2.60067	3.40206	2.81355	4.89554	2.81478	3.18847	3.40593	2.88018	2.47285	3.02818	4.09633	4.17833	4.09063	4.09725	3.44239	3.98099
118	unknown	449	5.98864,0	25	89	0.008736	4.67764e-07	0.0053977	0.00411396	0.00928843	0.00936284	0.00606415	0.00497663	0.00582972	0.00705189	0.00608218	0.003122	0.00359121	0.00841137	0.00799424	0.00886521	0.0046458	0.00870593	0.00663898	4.95477e-07	0.00893178	0.0060907	0.129771	0.120619	0.118017	0.10396	0.0646595	0.107405
121	3-Hydroxypyridine	605	6.0334,0	19	152	0.00270556	4.67764e-07	0.000903787	4.24611e-07	0.00250544	0.00190147	5.22327e-07	0.00111188	0.00118742	0.000870979	0.0011188	4.85981e-07	5.02499e-07	0.00117145	0.00235303	7.21909e-07	4.7977e-07	0.00237714	0.000773154	4.95477e-07	0.00172611	0.000840357	0.0132546	0.0188318	0.017251	0.0173398	0.00793577	0.0149226
122	3-hydroxybutyric acid	934	6.07248,0	25	147	0.0865973	4.67764e-07	4.39935e-07	0.0872873	0.203087	0.268133	0.233647	0.141645	0.101224	0.282544	0.140417	0.0317585	5.02499e-07	0.494367	0.24289	0.083442	0.151095	0.157754	0.0987326	4.95477e-07	0.218575	0.147862	1.16098	1.24812	1.21909	1.18675	0.836737	1.13033
123	unknown	450	6.07673,0	20	297	0.000487977	4.67764e-07	4.39935e-07	0.000215285	0.000422876	0.000297516	0.000311296	0.000209377	0.000195737	0.000124844	0.000226582	4.85981e-07	5.02499e-07	0.000637776	5.40238e-07	0.000323322	0.000229976	0.00032387	0.000248006	4.95477e-07	4.91404e-07	0.000176547	0.00428247	0.00536217	0.00504867	0.00463819	0.003044	0.0044751
124	sulfuric acid	432	6.08539,0	24	281	0.0054584	4.67764e-07	4.39935e-07	0.00180127	0.00489359	0.0033237	0.00267051	0.00437933	0.00205025	0.00218419	0.00267622	0.00150643	5.02499e-07	0.00547661	0.00330364	0.00267958	0.00214551	0.00293258	0.00264321	4.95477e-07	0.00437601	0.00250646	0.0325977	0.0348789	0.0314974	0.0301346	0.0153247	0.0288867
125	unknown	330	6.09904,0	25	145	0.0112674	4.67764e-07	0.00607178	0.00552719	0.0107547	0.015168	0.00585252	0.00661121	0.00740636	0.00692699	0.00755866	0.00597383	5.02499e-07	0.0115052	0.0205149	0.00716494	0.00902237	0.00890472	0.0121204	4.95477e-07	0.00713493	0.00823423	0.0666297	0.0771643	0.0726214	0.0694761	0.0394044	0.0650592
127	unknown	273	6.1138,0	23	128	0.00226697	4.67764e-07	4.39935e-07	4.24611e-07	0.00296439	0.00191772	0.00134884	0.00109352	0.0010919	0.000447098	0.00111318	0.00142181	5.02499e-07	0.00203935	0.00693448	0.000978384	0.00356365	0.00183598	0.00256581	0.00379414	0.00091414	0.00240482	0.00368827	0.00988456	0.0125744	0.0119443	0.00847237	0.00931277
128	4-HYDROXYPYRIDINE	223	6.12422,0	24	282	0.00134471	0.0130132	0.00097463	0.000847942	0.0069659	0.0067405	0.00110245	0.00115777	0.000937842	4.91404e-07	0.00330854	0.00170477	5.02499e-07	0.00183542	0.00862541	0.0013587	0.00391931	0.00475979	0.00135723	4.95477e-07	0.00170375	0.00252654	0.0023387	0.00519164	0.00811625	0.00677373	0.00480927	0.00544592
131	Analyte 146	239	6.15515,0	25	322	0.000925565	4.67764e-07	0.000389481	0.000365843	0.000897173	0.000855533	0.000519702	0.000432193	0.000425968	0.000483793	0.000529572	0.000287397	5.02499e-07	0.000843446	0.00111068	0.000686369	0.000482301	0.000614205	0.00057724	4.95477e-07	0.000925498	0.000552813	0.000706315	0.000957439	0.00107976	0.000919743	0.000906338	0.00091392
133	N-Methyl-DL-alanine	753	6.16736,0	25	130	0.00448939	4.67764e-07	0.00229057	0.00153008	0.00389486	0.00405025	0.00263023	0.00487016	0.00281549	0.00169461	0.00282661	0.00358198	5.02499e-07	0.00348381	0.0129204	0.00258026	0.00924288	0.00396002	0.00670758	0.00855632	0.00308089	0.00541147	0.0105074	0.0146298	0.017357	0.016859	0.0166529	0.0152012
134	Lactamide 1	369	6.1776,0	25	221	0.00641089	4.67764e-07	0.00272837	0.00237866	0.00625142	0.00636343	0.00350887	0.00294636	0.00278721	0.000681013	0.00340567	0.00152736	5.02499e-07	0.00567798	0.00724587	0.00453156	0.00312957	0.0044365	0.00330207	4.95477e-07	0.00642146	0.00362734	0.0118739	0.0171219	0.0193325	0.0182616	0.0195769	0.0172333
135	Analyte 151	0	6.17958,0	22	267	0.000729526	0.00111024	0.00026833	0.000265979	0.000633717	0.000564957	0.000364587	0.000296214	0.000224574	0.000476393	0.000493452	4.85981e-07	0.00139409	0.000615951	0.00081843	7.21909e-07	4.7977e-07	0.000495343	0.000340001	4.95477e-07	0.000856821	0.000452282	0.00133683	0.00168519	0.00169605	0.00130215	0.00168383	0.00154081
137	Methyl Phosphate	844	6.21707,0	25	241	0.0182307	4.67764e-07	0.00949388	0.00693656	0.0161425	0.0172437	0.0134477	0.00988656	0.011012	0.0108535	0.0113248	0.00531288	5.02499e-07	0.0146287	0.0249186	0.0110582	0.010652	0.0118025	0.0100737	4.95477e-07	0.0161242	0.0104572	0.0105567	0.034651	0.0557911	0.0611184	0.077044	0.0478323
139	Analyte 155	181	6.25776,0	25	57	0.00438407	4.67764e-07	0.00225568	0.00220947	0.00408656	0.00385538	0.00275351	0.00214306	0.00232864	0.00249737	0.00265142	0.00106202	5.02499e-07	0.00409783	0.00554107	0.00398788	0.00223842	0.00348372	0.00276345	4.95477e-07	0.00356023	0.00267356	0.0139225	0.0175499	0.0170736	0.0125119	0.0141068	0.0150329
141	Analyte 158	247	6.28709,0	25	211	0.00729994	4.67764e-07	0.00286751	0.00232795	0.00562312	0.00515754	0.0034119	0.00242536	0.00341233	0.0029394	0.00354655	0.00172699	5.02499e-07	0.00592928	0.00943769	0.00386223	0.00290395	0.00363139	0.00271194	4.95477e-07	0.00835395	0.00385584	0.0211223	0.0349225	0.0342456	0.0246262	0.0313099	0.0292453
142	Analyte 159	0	6.29552,0	25	221	0.00719356	4.67764e-07	0.00337909	0.00285405	0.00701762	0.0069913	0.00387384	0.00392031	0.00362332	0.000964693	0.00398183	0.00188715	5.02499e-07	0.00678014	0.0106582	0.00541356	0.00412518	0.00541968	0.00357122	4.95477e-07	0.0073932	0.00452494	0.0136334	0.0216579	0.0213741	0.0194842	0.021474	0.0195247
143	Analyte 160	202	6.30852,0	18	292	0.000283054	4.67764e-07	0.000201813	4.24611e-07	0.00026577	5.34049e-07	0.000235847	0.000234382	0.000145961	4.91404e-07	0.000136874	4.85981e-07	5.02499e-07	0.000356096	0.000544273	7.21909e-07	0.000167401	0.000247997	0.000222225	4.95477e-07	0.000313167	0.000185337	5.40823e-07	0.000881769	0.000855695	0.000770325	0.000919809	0.000685628
144	beta-Alanine 1	715	6.32741,0	25	102	0.00182684	4.67764e-07	0.00145596	0.000718348	0.00178715	0.00161109	0.00104896	0.00146717	0.00153453	0.00109079	0.00125413	0.000585428	5.02499e-07	0.00217931	5.40238e-07	0.00165395	0.00254295	0.00188685	0.00142165	0.0049327	0.00520905	0.00204129	0.00180923	0.00463616	0.00516771	0.00506228	0.0054457	0.00442422
145	Analyte 163	196	6.33386,0	23	210	0.00051745	4.67764e-07	0.000208103	0.000155029	0.000358212	0.000467564	0.00019013	0.000226829	0.000158948	4.91404e-07	0.000228322	4.85981e-07	5.02499e-07	0.000530266	0.000791271	0.000300438	0.000176399	0.000295938	0.000198888	0.0013721	4.91404e-07	0.000366678	0.000957652	0.00186581	0.00199099	0.00187177	0.00191079	0.0017194
146	Analyte 164	363	6.34933,0	19	188	0.000633358	4.67764e-07	0.000391238	4.24611e-07	5.20543e-07	0.000475067	0.000183784	0.000523546	0.000207018	0.000145191	0.000256062	4.85981e-07	5.02499e-07	0.000585033	0.00103605	7.21909e-07	0.000266307	0.000241567	5.12616e-07	0.00157319	0.00158694	0.00052913	0.00184711	0.00273352	0.00283575	0.00251057	0.00249784	0.00248496
148	unknown	394	6.36512,0	25	281	0.0024708	4.67764e-07	0.000929142	0.000735823	0.00201022	0.00172355	0.000989368	0.00112295	0.00106889	0.00155232	0.00126035	0.000606579	5.02499e-07	0.00210231	0.00287241	0.00153643	0.00102933	0.0013533	0.00102745	4.95477e-07	4.91404e-07	0.00105293	0.010393	0.00998951	0.00873611	0.00699757	0.00684239	0.00859171
149	unknown	521	6.37494,0	24	174	0.00198766	4.67764e-07	0.00114877	0.000925532	0.00217086	0.00179884	0.00139866	0.00144632	0.0011275	4.91404e-07	0.00120051	0.000556547	5.02499e-07	0.00206001	0.0033329	0.00186591	0.00135204	0.00159078	0.00145529	4.95477e-07	4.91404e-07	0.0012215	0.00567669	0.00899328	0.0102392	0.00986699	0.00934635	0.0088245
150	malonic acid 1	603	6.38153,0	20	262	0.0003743	4.67764e-07	4.39935e-07	0.000170028	0.000507327	0.000405992	0.000348663	0.000231692	0.000347194	0.000283554	0.000266966	4.85981e-07	5.02499e-07	0.000453619	5.40238e-07	0.000412493	4.7977e-07	0.000243826	5.12616e-07	4.95477e-07	0.00130833	0.000242129	0.00110962	0.00216845	0.00283187	0.00306227	0.00306147	0.00244674
151	Analyte 169	189	6.40256,0	24	226	0.00104269	4.67764e-07	0.000570532	0.000617186	0.0011877	0.00115606	0.000717019	0.000896359	0.000824722	0.000645397	0.000765813	0.000275274	5.02499e-07	0.00132587	0.00196645	0.00126541	0.000709247	0.000997723	0.000835653	4.95477e-07	4.91404e-07	0.000737711	0.000927844	0.00152576	5.04078e-07	0.00196658	0.00170092	0.00122432
154	Analyte 172	352	6.42694,0	24	207	0.00392381	4.67764e-07	0.00154651	0.00150798	0.00350981	0.00307778	0.00183553	0.00203293	0.0017435	4.91404e-07	0.00191788	0.000871295	5.02499e-07	0.003622	0.00495009	0.00273702	0.00188484	0.0022348	0.00193116	4.95477e-07	4.91404e-07	0.00182327	0.00841306	0.0115709	0.0129747	0.0112821	0.00829463	0.0105071
156	unknown	493	6.44737,0	17	131	0.000520851	4.67764e-07	0.00043195	4.24611e-07	5.20543e-07	0.000518347	0.000472346	0.000582344	0.000386752	4.91404e-07	0.000291449	4.85981e-07	5.02499e-07	0.000858979	0.00117769	0.000418173	4.7977e-07	0.000647704	5.12616e-07	0.00152119	4.91404e-07	0.000462621	0.00269936	0.00346097	0.00372735	0.00326946	4.84689e-07	0.00263153
157	cycloleucine 2	357	6.45237,0	25	57	0.019578	4.67764e-07	0.0115498	0.0109272	0.0240016	0.020671	0.0130478	0.0130534	0.0114819	0.0143489	0.013866	0.0060907	5.02499e-07	0.0207943	0.00284941	0.0193282	0.0129272	0.0183959	0.0137167	4.95477e-07	4.91404e-07	0.0094104	0.0911692	0.105176	0.105264	0.0915082	0.0651681	0.0916569
158	alpha-ketoisocaproic acid 1	610	6.47073,0	22	185	4.77128e-07	4.67764e-07	0.000415361	0.000254484	0.00120947	0.000611356	0.000391802	0.000495846	0.000338133	0.000289313	0.000400671	4.85981e-07	5.02499e-07	0.000810116	0.00100832	0.000515039	4.7977e-07	0.000594476	0.000326553	0.00200763	0.00159257	0.000685617	0.00326076	0.00381746	0.00374965	0.00337986	0.00246072	0.00333369
159	valine	969	6.48944,0	25	144	0.290407	0.767509	0.199235	0.0997893	0.328154	0.159555	0.152942	0.160864	0.192254	0.126617	0.247733	0.342694	1.01994	0.210375	0.994302	0.167559	4.7977e-07	0.252916	0.349947	0.608217	0.469087	0.441504	0.894902	0.933746	0.943261	0.92943	0.797223	0.899712
162	naphthalene	276	6.54032,0	25	57	0.0105926	4.67764e-07	0.00632351	0.00627386	0.0129677	0.0103676	0.00696507	0.00668624	0.00604775	0.00711316	0.00733379	0.00466376	5.02499e-07	0.0111108	0.0082111	0.0102577	0.00637809	0.00956325	0.00741431	4.95477e-07	4.91404e-07	0.00576005	0.0538369	0.0595643	0.0349182	0.0434107	0.0318874	0.0447235
163	Analyte 181	244	6.56782,0	22	227	0.000447935	4.67764e-07	0.000225724	0.000228754	0.000435812	5.34049e-07	0.000208653	0.000203209	0.000263729	0.000249891	0.000226471	0.000334005	5.02499e-07	0.000440151	0.000553088	0.000427091	0.000302205	0.000322435	5.12616e-07	4.95477e-07	4.91404e-07	0.000238098	0.00209911	0.0024503	0.00243167	0.00248031	0.00160896	0.00221407
164	unknown	207	6.57286,0	14	85	0.000214129	0.00133008	0.000228326	4.24611e-07	0.000382456	5.34049e-07	0.000252453	4.47719e-07	0.000194378	4.91404e-07	0.000260372	4.85981e-07	0.000955482	0.000319885	0.000625028	7.21909e-07	4.7977e-07	6.05777e-07	5.12616e-07	4.95477e-07	0.00080669	0.000271039	0.00175823	0.00139959	0.00143217	5.04078e-07	0.00108877	0.00113585
170	Carnitine	320	6.63285,0	22	116	0.0019486	4.67764e-07	0.0013307	0.00157285	0.00271671	0.00217197	0.00167359	0.0017959	0.00150022	0.00179435	0.00165053	0.00101253	5.02499e-07	0.00255785	0.00291	0.00267954	0.00171339	0.00189663	0.00187145	4.95477e-07	4.91404e-07	0.00146429	0.0135477	5.07503e-07	5.04078e-07	0.0149391	0.0147334	0.00864423
171	2-Butyne-1,4-diol	531	6.638,0	12	233	4.77128e-07	4.67764e-07	0.0001926	0.000213376	0.000286906	5.34049e-07	0.000279456	0.000312199	4.19214e-07	4.91404e-07	0.000128693	4.85981e-07	5.02499e-07	5.15058e-07	5.40238e-07	7.21909e-07	4.7977e-07	6.05777e-07	5.12616e-07	0.000717813	0.000503555	0.000122573	0.00125832	0.0013307	5.04078e-07	0.00152538	0.00101223	0.00102543
172	unknown	286	6.65429,0	21	318	0.000424068	4.67764e-07	4.39935e-07	4.24611e-07	0.000548074	0.00043185	0.000234695	0.000281566	0.000224236	0.000204965	0.000235079	4.85981e-07	5.02499e-07	5.15058e-07	0.000341764	0.000420069	0.000191757	0.000324841	0.00025954	4.95477e-07	0.0012304	0.000277037	0.00166983	0.00203259	0.00225134	0.00231303	0.00171402	0.00199616
174	norvaline	399	6.65867,0	18	159	4.77128e-07	4.67764e-07	0.000494187	4.24611e-07	0.000695572	0.00101384	0.000469358	0.000641425	4.19214e-07	4.91404e-07	0.000331666	4.85981e-07	5.02499e-07	0.000902736	0.00119433	0.000743744	0.000556556	0.000610222	0.000712308	4.95477e-07	4.91404e-07	0.000472187	0.0038123	0.00408432	0.0044465	0.00457218	0.00335398	0.00405386
178	unknown	208	6.71644,0	15	184	0.000444274	4.67764e-07	4.39935e-07	0.00013408	0.000303207	0.000290501	5.22327e-07	4.47719e-07	4.19214e-07	0.00012212	0.000129648	4.85981e-07	5.02499e-07	0.000305971	0.000203712	0.000225075	0.000118199	6.05777e-07	5.12616e-07	4.95477e-07	4.91404e-07	8.56051e-05	5.40823e-07	0.00104834	0.000751767	0.000646294	0.000672966	0.000623981
179	Citraconic acid degr1	310	6.73311,0	24	68	0.00652493	4.67764e-07	0.00322091	0.00358017	0.00652484	0.0054529	0.00354528	0.00377932	0.00313135	0.00352203	0.00392822	4.85981e-07	5.02499e-07	0.00579204	0.00504215	0.00624113	0.00324134	0.00476661	0.00425554	4.95477e-07	4.91404e-07	0.00293408	0.0218383	0.0233391	0.0232106	0.0234284	0.0251108	0.0233855
180	2-ketoadipate 3	357	6.74226,0	23	96	4.77128e-07	0.0173162	0.00278913	0.00312128	0.00551109	0.00445455	0.0031839	0.00332642	0.00295587	0.00389637	0.00465553	4.85981e-07	0.0200236	0.00518051	0.00542499	0.00566155	0.00424011	0.00412388	0.00397675	4.95477e-07	0.0150049	0.00636373	0.0101919	0.0127083	5.04078e-07	0.0129808	0.0171695	0.0106102
185	Carbobenzyloxy-L-leucine degr1	293	6.8047,0	23	319	0.0576782	0.0946751	0.046101	0.0291255	0.0616347	0.0589503	5.22327e-07	0.0374117	4.19214e-07	0.0349902	0.0420568	0.0713624	0.0963144	0.0545793	0.0570184	0.0564378	0.0133232	0.0351423	0.0731153	0.0861106	0.0561906	0.0599594	0.0540827	0.052844	0.0532779	0.050756	0.0539383	0.0529798
186	oxamic acid	587	6.82894,0	24	189	2.28984	2.62624	2.49695	1.51595	2.71205	2.54259	5.22327e-07	1.39793	2.27385	1.3415	1.91969	1.85646	3.7324	2.26537	4.52152	2.09109	2.07339	2.44398	5.12616e-07	2.91625	2.21829	2.41187	3.66695	3.50303	3.82373	3.6615	4.84689e-07	2.93104
187	cyclohexane-1,2-diol	442	6.90948,0	9	341	0.000830887	4.67764e-07	0.00101103	0.000969382	5.20543e-07	1.02611e-05	5.22327e-07	4.47719e-07	0.000927216	4.91404e-07	0.000375122	4.85981e-07	5.02499e-07	5.15058e-07	7.46818e-05	7.21909e-07	4.7977e-07	6.05777e-07	5.12616e-07	4.95477e-07	4.91404e-07	7.94923e-06	0.00136993	1.64995e-05	0.000321095	5.04078e-07	4.84689e-07	0.000341703
189	glycerol	945	6.88043,0	25	117	0.78861	0.975529	1.07937	1.08878	1.19408	1.17601	1.14856	1.06491	1.02585	0.928146	1.04699	0.610487	0.918334	1.15932	1.43594	1.52634	0.982324	1.25091	0.784608	1.0532	0.729326	1.04508	1.14142	1.18308	1.19554	1.24179	0.977592	1.14788
190	unknown	621	6.89264,0	23	158	0.324518	0.430156	0.658246	0.326329	5.20543e-07	0.449935	0.411086	0.567919	0.63307	0.439706	0.424097	0.680161	0.586501	0.462274	5.40238e-07	0.579526	4.7977e-07	0.832113	0.90674	0.302254	0.243196	0.459277	0.663434	0.596604	0.574216	0.543362	4.84689e-07	0.475523
191	phosphate	890	6.92395,0	25	211	4.77128e-07	0.597628	0.826907	0.774215	0.876144	0.940432	1.0452	0.719429	0.802551	0.810602	0.739311	0.761934	0.665482	0.914326	1.02531	1.20266	0.87911	1.08022	0.839666	0.611218	0.643189	0.862311	0.664159	0.722359	0.728338	0.783967	0.560895	0.691944
197	N-cyclohexylformamide 1	341	6.98805,0	25	71	0.0320366	4.67764e-07	0.0252752	0.0227534	0.0327499	0.0360171	0.0295379	0.0274408	0.0227013	0.0285584	0.0257071	4.85981e-07	5.02499e-07	0.0316206	0.0242945	0.040348	0.0231757	0.0341365	0.0297233	4.95477e-07	0.0375701	0.022087	0.153459	0.137014	0.131763	0.07683	0.061906	0.112195
200	3-hydroxypyruvate	233	7.02357,0	25	341	0.00115181	4.67764e-07	0.000648742	0.000722325	0.000996383	0.00103941	0.000716751	0.000779402	0.000625163	0.000559007	0.000723946	0.00176218	5.02499e-07	0.00102558	0.000880054	0.00101804	0.000729291	0.000871252	0.000835344	4.95477e-07	0.0013654	0.000848813	0.00325132	0.00313008	0.00163564	0.00114302	0.000796443	0.0019913
201	Isoleucine	941	7.05029,0	25	158	0.0624434	4.67764e-07	0.065166	0.0347081	0.0669209	0.0376887	0.0462203	0.0568411	0.0589309	0.0468841	0.0475804	0.10461	0.163598	0.0488913	0.162256	0.05382	0.145224	0.0704357	0.0978182	0.0958966	0.0575522	0.10001	0.342781	0.34259	0.25254	0.148402	0.124369	0.242136
205	maleic acid	521	7.08589,0	24	129	0.0017119	4.67764e-07	0.00132987	0.00122379	0.00158403	0.00125454	0.0011846	0.00143161	0.00130429	0.00101896	0.00120441	0.00151754	0.00191485	0.00152964	0.00100487	0.00197662	0.000768957	0.00113651	0.000931898	4.95477e-07	0.00230214	0.00130835	0.00741535	0.00764862	0.00509741	0.00313531	4.84689e-07	0.00465943
207	unknown	291	7.12474,0	18	112	4.77128e-07	4.67764e-07	4.39935e-07	0.00032768	0.000358065	5.83737e-05	0.000624002	0.000592655	5.54803e-05	4.91404e-07	0.000201813	4.85981e-07	5.02499e-07	5.15058e-07	5.40238e-07	0.000654366	0.000703454	0.000378363	0.000515817	0.000828431	0.000664118	0.000374659	0.0020314	0.0022869	0.00114379	0.00101419	0.000859711	0.0014672
208	proline	942	7.11552,0	25	142	0.100992	4.67764e-07	0.0834572	0.0544841	0.0700278	0.0637413	0.0662768	0.109644	0.0857464	0.0452359	0.0679607	0.172506	5.02499e-07	0.0623526	0.15123	0.0740989	0.145844	0.0743168	0.123241	0.0949408	0.0693048	0.0967835	0.242056	0.266843	0.169388	0.118764	0.0954382	0.178498
209	1,4-Cyclohexanedione 2	342	7.14544,0	25	85	0.00237267	4.67764e-07	0.00167266	0.00166703	0.00243457	0.00229537	0.00260685	0.00321211	0.00239038	0.00260303	0.00212551	0.0023867	0.00319943	0.00187194	0.00162181	0.00336036	0.00147174	0.00229951	0.00252891	0.00364702	0.00359305	0.00259805	0.00955112	0.00924931	0.00643303	0.00484204	0.00424323	0.00686375
210	glycine 2	954	7.15808,0	25	174	0.027303	4.67764e-07	0.0249226	0.0214499	0.0250059	0.0334109	0.0365038	4.47719e-07	0.0477434	0.0369051	0.0253245	0.0334617	0.0407987	0.0326737	0.0209605	0.054738	0.0267352	0.0392082	0.0304788	4.95477e-07	0.0650754	0.0344131	0.0595462	0.0685797	0.04559	0.0360258	0.0349804	0.0489444
211	Analyte 234	407	7.16549,0	25	204	0.00106626	4.67764e-07	0.000858952	0.000868594	0.00123078	0.000852302	0.000936855	0.00118661	0.000910928	0.000904537	0.000881628	0.000806793	0.0010667	0.0009164	0.00060907	0.00162328	0.000510932	0.000854065	0.000645264	4.95477e-07	0.00124667	0.000827968	0.00279872	0.00408952	0.00239026	0.00145285	0.00128894	0.00240406
212	unknown	478	7.19083,0	24	129	0.00376513	4.67764e-07	0.00452779	0.00267487	0.00360861	0.00251495	0.00327781	4.47719e-07	4.19214e-07	0.00245302	0.00228235	0.00392769	0.00410718	0.00275279	0.00325671	0.00511721	0.00237376	0.00303772	0.00246651	4.95477e-07	0.00401827	0.00310583	0.0203151	0.0196467	5.04078e-07	0.00600372	0.00509439	0.0102121
213	succinic acid	904	7.20005,0	25	147	0.0206074	4.67764e-07	0.0297329	0.0144885	0.0175589	0.0111024	0.0169764	4.47719e-07	4.19214e-07	0.0119313	0.0122399	0.0231244	0.0312598	0.0127408	0.022916	0.0238799	0.0161613	0.0164197	0.0145494	4.95477e-07	0.0224606	0.0183512	0.187806	0.165344	0.121092	0.0500985	0.0442224	0.113713
214	unknown	294	7.20622,0	21	71	0.00309792	4.67764e-07	0.00189149	0.00181222	0.00269193	5.34049e-07	0.0023428	4.47719e-07	4.19214e-07	0.00226328	0.00141015	0.00357104	0.00401464	0.00212732	0.00210009	0.00451841	0.00250742	0.00244115	0.00239667	4.95477e-07	0.00325598	0.00269332	0.012236	0.0136183	0.0119542	5.04078e-07	4.84689e-07	0.00756188
217	Thymol	239	7.22439,0	24	240	0.000451199	4.67764e-07	0.000263514	0.000257741	0.000492981	0.000496797	0.000341243	4.47719e-07	0.000424342	0.000315915	0.000304465	0.000624504	0.000789217	0.000388473	0.00044815	0.000731812	0.000315391	0.000580645	0.000360961	4.95477e-07	0.000685583	0.000492523	0.00269829	0.00259525	0.00246045	0.000985552	0.000943004	0.00193651
218	unknown	280	7.19659,0	25	69	0.00503299	4.67764e-07	0.00293355	0.00364463	0.00539032	0.00467516	0.00431548	0.00346779	0.00418591	0.00437599	0.00380223	0.00528302	0.00709804	0.00337478	0.00414793	0.00799339	0.0035076	0.0044841	0.0039435	4.95477e-07	0.00548295	0.00453158	0.0230351	0.0215547	0.0222698	0.00804161	0.0079222	0.0165647
220	Analyte 243	205	7.24469,0	25	209	0.00127307	4.67764e-07	0.000788493	0.000820943	0.00134789	0.00126087	0.000982149	0.00113248	0.000939267	0.00100014	0.000954577	0.00143976	0.00179564	0.00104701	0.00117497	0.00213733	0.000886948	0.00130016	0.00081136	4.95477e-07	0.00173742	0.00123311	0.00429595	0.00569345	0.00643924	0.00210013	0.00199086	0.00410393
221	Bis(2-hydroxypropyl)amine 2	221	7.25541,0	25	130	0.00221642	4.67764e-07	0.0019383	0.00224659	0.00350603	0.00250878	0.00267317	0.00288276	0.0023688	0.00372609	0.00240674	0.00349472	0.00393971	0.00234507	0.00302944	0.0054556	0.00239608	0.00253626	0.00263353	4.95477e-07	0.00380661	0.00296375	0.00753359	0.00990854	0.0140008	0.00431989	0.00443292	0.00803916
224	D-Glyceric acid	873	7.2712,0	25	189	0.00135951	4.67764e-07	0.000947698	0.000787382	0.00119812	0.00108444	0.00132921	0.00147041	0.00121841	0.000825945	0.00102216	0.00179852	0.00186112	0.00101862	0.00112474	0.00166544	0.000990013	0.00107913	0.000811752	4.95477e-07	0.00233539	0.00126852	0.00749747	0.0106278	0.0139031	0.00356249	0.00343402	0.00780497
226	Analyte 249	224	7.2938,0	23	83	0.00232366	4.67764e-07	0.00161915	0.00162881	0.00192375	0.00152063	0.00176963	0.00204909	0.00176366	0.00176057	0.00163594	0.00247526	0.0026536	5.15058e-07	0.00199528	0.00343326	0.0011282	0.00193822	0.0012264	4.95477e-07	0.00275832	0.00176095	0.00760821	0.00489939	0.00394929	0.00569093	0.00542901	0.00551537
227	4-Acetylbutyric acid 2	222	7.30912,0	25	71	0.0237217	4.67764e-07	0.0162017	0.0173022	0.0256744	0.0209296	0.0176646	0.0209295	0.017154	0.0168841	0.0176462	0.0266599	0.0288068	0.019292	0.0194135	0.0367619	0.0150912	0.022193	0.0177299	4.95477e-07	0.0314561	0.0217405	0.123084	0.137902	0.128455	0.0513524	0.0448857	0.0971359
232	Itaconic acid	455	7.36027,0	25	117	0.00122757	4.67764e-07	0.000720163	0.000836483	0.00110609	0.000823591	0.000834774	0.000986813	0.000996807	0.000669619	0.000820237	0.00102221	0.00073139	0.000547492	0.000424469	0.00177447	0.000353049	0.000855088	0.000350686	4.95477e-07	0.00126165	0.0007321	0.00678674	0.00633746	0.00641092	0.00199082	0.00195932	0.00469705
234	uracil	749	7.38149,0	25	241	0.00136373	4.67764e-07	0.000646558	0.000605388	0.00114358	0.000777265	0.000436369	0.00162448	0.000766811	0.000577219	0.000794186	0.0015211	0.00163386	0.00086434	0.000717474	0.00174017	0.000648304	0.000829603	0.00044471	4.95477e-07	0.00126943	0.000966948	0.0269515	0.0171915	0.0135078	0.00240967	0.00177801	0.0123677
237	Allylmalonic acid	330	7.42384,0	25	271	0.00015435	4.67764e-07	0.000398798	0.000338698	0.000826525	0.000291869	0.000502425	0.000392474	0.000478536	0.000186606	0.000357075	0.000626471	0.000996906	0.000264904	0.000478936	0.000658001	0.000338568	0.000310341	0.000249818	4.95477e-07	0.000313839	0.000423828	0.000815201	0.00138428	0.00129484	0.00063726	0.000526937	0.000931703
238	unknown	189	7.43733,0	24	71	0.00833468	4.67764e-07	0.00565251	0.00713473	0.00855106	0.00731338	0.00603632	0.00716394	0.00693113	0.00565544	0.00627737	0.0107478	0.0113772	0.00619041	0.00654916	0.017631	0.00517	0.00912678	0.00602844	4.95477e-07	0.00943229	0.00822535	0.0320629	0.0426598	5.04078e-07	0.0143095	0.0120749	0.0202215
240	fumaric acid	863	7.44891,0	25	245	0.00605498	4.67764e-07	0.00318305	0.00276705	0.00400439	0.00266118	0.00288137	0.00556895	0.00424906	0.00208783	0.00334583	0.00665832	0.00812217	0.00293625	0.00425368	0.0066806	0.00313561	0.005523	0.00267917	4.95477e-07	0.0068246	0.00468139	0.0548711	0.0493624	0.0399393	0.00973329	0.00730578	0.0322424
243	serine 1	920	7.48437,0	25	204	0.0891674	4.67764e-07	0.0450122	0.121733	0.0534604	0.0360393	0.0516488	4.47719e-07	0.164153	0.0339637	0.0595178	0.0965093	0.0838478	0.0433354	0.0532699	0.0949461	0.0526352	0.0527426	0.0444392	0.181989	0.0559852	0.07597	0.238216	0.241257	0.261611	0.116639	0.073758	0.186296
245	unknown	469	7.50304,0	25	221	0.00634266	4.67764e-07	0.00263266	4.24611e-07	0.00476969	0.00333492	0.00284562	4.47719e-07	0.00859764	0.00278505	0.00313096	0.00607496	0.00741717	0.00288898	0.00303819	0.0107574	0.00166908	0.00383056	0.00254825	4.95477e-07	0.00498312	0.00432082	0.0462866	0.0447132	0.0450275	0.018447	0.00904105	0.0327031
246	unknown	258	7.51461,0	25	241	0.00273773	4.67764e-07	0.00172708	4.24611e-07	0.00258194	0.00149953	0.00156311	4.47719e-07	0.00234481	0.00130405	0.00137596	0.00363217	0.00316338	0.00148467	0.00144228	0.00436713	0.00119262	0.00193173	0.00109273	4.95477e-07	0.0020629	0.00203701	0.00809987	0.0097129	0.0104861	0.00600121	0.00258817	0.00737764
248	Pelargonic acid	783	7.55211,0	25	215	0.000824721	4.67764e-07	0.000380678	0.00118361	0.000678011	0.000612661	0.000415736	4.47719e-07	0.000571446	0.000369221	0.0005037	0.000498757	0.00107166	0.000408708	0.000456774	0.000901877	0.000353567	0.000690097	0.000284824	4.95477e-07	0.000578092	0.000524485	0.00401173	0.00376153	0.00365631	0.00414483	0.00153474	0.00342183
250	Analyte 276	182	7.56675,0	17	393	0.000137749	4.67764e-07	4.39935e-07	4.24611e-07	0.00010944	5.34049e-07	5.22327e-07	4.47719e-07	0.000161952	0.000168687	5.80665e-05	0.000168491	0.000243612	5.15058e-07	5.40238e-07	0.000233329	0.00012053	0.000176566	5.12616e-07	4.95477e-07	0.000132763	0.000107736	0.000362181	0.000429768	0.000392243	0.000434022	4.84689e-07	0.00032374
252	Pipecolinic acid	769	7.58475,0	25	156	0.00343091	4.67764e-07	0.00282827	0.00452954	0.00413037	0.00277496	0.00357518	4.47719e-07	0.00545623	0.00442968	0.0031156	0.0038447	0.00501782	0.00217145	0.00367732	0.00825458	0.00284115	0.00373568	0.0028535	4.95477e-07	0.00224673	0.00346434	0.0108817	0.0123127	0.0123084	0.0120873	0.00280342	0.0100787
255	Analyte 281	240	7.54978,0	18	71	4.77128e-07	4.67764e-07	0.00160481	4.24611e-07	0.00239869	5.34049e-07	0.00175791	4.47719e-07	0.000436219	4.91404e-07	0.000620048	0.00362438	0.00308767	0.00172168	5.40238e-07	0.0049376	0.00140904	0.00232381	5.12616e-07	0.00145384	0.000466573	0.00190256	0.0036161	0.00364578	0.00302328	0.00285006	0.000525057	0.00273205
256	Analyte 282	388	7.65362,0	14	246	0.000292628	4.67764e-07	4.39935e-07	0.000908652	5.20543e-07	5.34049e-07	5.22327e-07	7.78536e-05	0.00111551	4.91404e-07	0.000239762	0.000210307	0.000468579	0.000280971	5.40238e-07	0.00137566	4.7977e-07	6.05777e-07	5.12616e-07	0.000929874	4.91404e-07	0.000326803	0.000854869	0.00103604	0.000954805	0.000896252	0.000118435	0.00077208
258	unknown	413	7.62437,0	25	221	0.000659501	4.67764e-07	0.000194615	0.000271532	0.000370101	0.000320673	0.000204104	4.47719e-07	0.000320217	0.000241297	0.000258296	0.00040073	0.000892376	0.000470301	0.000485118	0.00093497	0.000215017	0.00045235	0.000259116	4.95477e-07	0.00070364	0.000481411	0.00448022	0.00378364	0.00291789	0.00217536	0.000353485	0.00274212
260	threonine 1	941	7.65707,0	25	219	0.0736272	0.152009	0.0238659	0.0722066	0.0391557	0.0159263	0.0237019	0.115917	0.117538	0.0150384	0.0648986	0.057597	0.1527	0.0315979	0.0492121	0.102463	0.168397	0.0322702	0.0333871	0.103582	0.03102	0.0762226	0.153653	0.157216	0.158824	0.16148	0.03111	0.132457
261	L-Allothreonine 1	331	7.68592,0	25	263	0.00181311	0.00762868	0.000934519	0.00463177	0.00188604	0.00131161	0.00119226	0.00501836	0.00624564	0.000744241	0.00314062	0.00112239	0.00604165	0.00199418	0.00174857	0.00841183	0.00130658	0.00188174	0.00134505	0.0056061	0.00196412	0.00314222	0.00644012	0.0071349	0.00802399	0.00613733	0.00150754	0.00584878
262	resorcinol	319	7.69584,0	25	240	0.00110592	0.00531518	0.00054239	0.0029107	0.00105722	0.000734653	0.000585145	0.00375923	0.00338529	0.00053151	0.00199272	0.000687348	0.00358729	0.00102662	0.000749985	0.00501792	0.000573261	0.00119953	0.000538059	0.00345253	0.00120996	0.00180425	0.00522548	0.00431634	0.00414875	0.00323029	0.000766648	0.0035375
266	Analyte 294	200	7.77774,0	23	116	0.000730895	0.00297584	0.000465205	0.000588256	0.000882656	0.000605441	0.000447136	0.00403908	0.0029805	4.91404e-07	0.00137155	0.000245033	0.00321018	0.000715751	0.000667089	0.0047269	0.000830792	0.000674851	0.000568512	0.0018388	0.000767745	0.00142457	0.00177605	0.00225674	0.00238293	0.002189	4.84689e-07	0.00172104
270	Analyte 298	0	7.82741,0	25	103	0.0110247	0.0321783	0.0055666	0.00855422	0.00840896	0.00690243	0.00738645	0.0371498	0.0393064	0.00521165	0.016169	0.00612991	0.0470426	0.0102068	0.0104654	0.0436382	0.00870945	0.0143682	0.00623465	0.0338365	0.0252452	0.0205877	0.0454415	0.0493956	0.0531364	0.0518237	0.0324598	0.0464514
273	Biphenyl	382	7.84458,0	23	154	0.000680684	0.00187401	0.000295388	0.000562215	0.000533036	0.000344514	0.000389968	4.47719e-07	0.00197352	0.000263102	0.000691689	0.000319989	5.02499e-07	0.000543792	0.000733183	0.00197498	0.000707544	6.05777e-07	0.000412579	4.95477e-07	0.00115353	0.00058472	0.00707793	0.0084862	0.00937567	0.0100666	0.0061979	0.00824085
274	hydroquinone	219	7.85755,0	25	57	0.0242583	0.0591742	0.00972317	0.0244667	0.0127305	0.0144643	0.00994019	0.0521346	0.0612831	0.0124478	0.0280623	0.0066018	0.0500144	0.0204997	0.0219798	0.0772089	0.013547	0.0359337	0.0115021	0.027844	0.0401162	0.0305248	0.103412	0.101561	0.104993	0.103775	0.0556643	0.0938811
275	Analyte 303	288	7.87441,0	21	327	0.000207082	0.000808634	0.000111224	0.000180662	0.000222669	0.000102576	9.34969e-05	0.000847462	0.000660981	4.91404e-07	0.000323528	4.85981e-07	0.00101922	0.000245305	0.000187141	0.000895847	0.000175497	0.000390654	5.12616e-07	0.000685788	0.000615983	0.000421643	0.000307443	0.000390277	0.000373527	0.000303627	4.84689e-07	0.000275072
282	unknown	311	7.95043,0	23	218	0.000518157	0.00229713	0.000404624	0.00123772	5.20543e-07	0.000277837	0.000344552	4.47719e-07	0.00051963	0.000370729	0.000597135	0.000485417	0.00125131	0.00045683	0.000459577	0.00249044	0.000454382	0.00136396	0.00021767	4.95477e-07	0.00163497	0.000881504	0.0013871	0.00178994	0.00172583	0.0019786	0.00104806	0.0015859
283	2-Deoxytetronic acid	860	7.95605,0	25	73	0.0132286	0.0696249	0.0136562	0.0558442	0.0131564	0.0143424	0.0137903	0.0566412	0.0578777	0.0137989	0.0321961	0.0106027	0.0442022	0.0165613	0.0178895	0.0620295	0.0213404	0.0402524	0.0106223	0.055169	0.0380242	0.0316693	0.0661045	0.0718983	0.0758104	0.0727157	0.0430887	0.0659235
288	Analyte 318	354	8.00722,0	17	218	0.000147782	0.000824882	0.000226586	0.000384938	0.000167169	0.000135477	5.22327e-07	4.47719e-07	0.000642859	0.000135756	0.000266642	0.00032413	0.000579227	0.000203385	5.40238e-07	7.21909e-07	0.000160844	0.00071998	5.12616e-07	4.95477e-07	4.91404e-07	0.000199033	5.40823e-07	0.000209545	0.000153701	0.00032179	4.84689e-07	0.000137212
289	unknown	487	8.01477,0	25	174	0.00128918	0.0061391	0.00125114	0.00422043	0.0016632	0.00141976	0.00120048	0.00655829	0.00797272	0.00152774	0.0033242	0.00230966	0.00705809	0.00180037	0.00143176	0.00935248	0.00207189	0.00616687	0.00134563	0.0104401	0.00871482	0.00506917	0.00312164	0.003275	0.00338168	0.00407054	0.00273785	0.00331734
294	L-homoserine 1	551	8.08813,0	20	218	0.00133703	0.000908068	0.000219136	0.000693075	5.20543e-07	5.34049e-07	5.22327e-07	0.0015105	0.00109693	4.91404e-07	0.00057668	4.85981e-07	0.00199732	5.15058e-07	0.000511262	0.00121376	0.000871536	0.0009767	0.000371615	0.00124524	0.000957233	0.000814567	0.00102216	0.00130698	0.00125377	0.00136738	0.00104423	0.0011989
295	3-Hydroxynorvaline 1	221	8.10078,0	24	302	0.00313873	0.00386308	0.000736976	0.00210083	0.000896389	0.000925154	0.000726604	0.00254434	0.00313283	4.91404e-07	0.00180654	0.00393464	0.00398987	0.00102115	0.000899255	0.00407465	0.00120319	0.00197395	0.00073058	0.00337659	0.00254881	0.00237527	0.00593507	0.00740619	0.00768235	0.00765022	0.00633761	0.00700229
297	Erythrose 1	531	8.1184,0	25	350	0.0554169	0.0722233	0.0161823	0.0371313	0.0137143	0.0155827	0.010726	0.0634187	0.0468786	0.00872485	0.0339999	0.0750121	0.0734464	0.0191363	0.0147297	0.0744059	0.0207231	0.0191363	0.0110258	0.0666169	0.0493315	0.0423564	0.104695	0.13325	0.146216	0.147754	0.146805	0.135744
300	Analyte 330	376	8.19745,0	11	103	4.77128e-07	0.00543109	0.000942088	0.00426333	5.20543e-07	5.34049e-07	0.000625531	0.00322061	0.0035144	4.91404e-07	0.00179991	4.85981e-07	5.02499e-07	5.15058e-07	5.40238e-07	0.00370116	4.7977e-07	6.05777e-07	5.12616e-07	4.95477e-07	4.91404e-07	0.000370579	0.00242972	0.00271165	5.04078e-07	0.00530565	0.00466195	0.00302189
301	Analyte 332	359	8.18491,0	25	128	0.0226542	0.0239458	0.00758545	0.0153748	0.00730169	0.00501308	0.00459348	0.021957	0.0313797	0.00471639	0.0144522	0.0425305	0.0420215	0.00595965	0.0133175	0.0153805	0.0238592	0.0209297	0.00845896	0.0191828	0.0128763	0.0204517	0.00705187	0.00833098	0.00906309	0.0114162	0.0129344	0.0097593
302	3-Aminoisobutyric acid 1	516	8.19445,0	25	154	0.00572467	0.0083177	0.00142398	0.00667923	0.00213565	0.00251295	0.00109918	0.0100817	0.0109299	0.00134812	0.0050253	0.00831878	0.0101483	0.00219483	0.00153469	0.0130343	0.00307405	0.00809739	0.00114707	0.0139894	0.0126648	0.00742037	0.00379864	0.00445708	0.00456791	0.00516436	0.00448883	0.00449536
306	Aminomalonic acid	849	8.23167,0	24	218	0.0183568	0.0224631	0.00688624	0.0206401	0.00776736	0.00985301	0.00871989	4.47719e-07	4.19214e-07	0.00226893	0.00969563	0.020855	0.0208272	0.0077931	0.0043515	0.0380286	0.0100089	0.0285978	0.00635043	4.95477e-07	4.91404e-07	0.0136813	0.00883485	0.0110861	5.04078e-07	0.0134396	0.0140354	0.0094793
308	unknown	453	8.24461,0	24	72	4.77128e-07	0.0399114	0.0121156	0.0336901	0.0114573	0.0151799	0.0088474	0.0460265	0.0517094	0.0090097	0.0227948	0.0471836	0.0445887	0.0131363	0.0104379	0.0672646	0.0144225	0.0403673	0.0100739	0.0642819	0.0557582	0.0367515	0.0314229	0.0435592	0.0472987	0.0454857	0.0450821	0.0425697
309	unknown	218	8.25467,0	23	85	4.77128e-07	4.67764e-07	0.00395971	0.0143588	0.00343607	0.00548595	0.00274174	0.0277249	0.00294804	0.00240137	0.00630575	0.0162314	0.0147655	0.00423008	0.00114905	0.0230156	0.0046055	0.006869	0.00297874	0.0192037	0.00418027	0.00972289	0.0174196	0.0177488	0.0176358	0.0186539	0.0143093	0.0171535
313	N-ethylmaleamic acid 3	268	8.29787,0	25	155	0.0133417	0.0125884	0.00352598	0.00904883	0.00228373	0.00372841	0.00211902	0.0112635	0.0114884	0.00127642	0.00706644	0.0143862	0.0167333	0.00425742	0.0048263	0.00850249	0.021533	0.0113368	0.00219397	0.0181497	0.0107679	0.0112687	0.0282119	0.0240347	0.022972	0.0180932	0.0189485	0.022452
315	L-Malic acid	927	8.32448,0	25	233	0.0122915	0.0172259	0.00691336	0.010961	0.00395039	0.00372184	0.00248637	0.0215902	0.0147897	0.00161475	0.0095545	0.0183464	0.0275069	0.00324712	0.0068425	0.0153676	0.0245038	0.0111732	0.00454056	0.0184328	0.0140469	0.0144008	0.028631	0.0261812	0.0244059	0.0198458	0.0181306	0.0234389
316	Analyte 351	206	8.34444,0	24	305	0.00274145	0.00455474	0.00108432	0.00246278	0.00122071	0.00106928	0.000562718	0.0030629	0.00319527	0.000382816	0.0020337	0.00233918	0.00316171	0.000998385	0.000387913	7.21909e-07	0.0014376	0.00133226	0.000598376	0.0038384	0.00272476	0.00168193	0.00329707	0.00334897	0.00333072	0.00293276	0.00243588	0.00306908
322	Analyte 359	621	8.42006,0	23	71	0.0914601	0.0873244	0.0314184	0.0783036	0.0913729	0.038494	0.0178351	0.0881975	4.19214e-07	0.0196514	0.0544058	0.0891407	5.02499e-07	0.042473	0.0180461	0.181386	0.077909	0.0295436	0.0264044	0.116912	0.0875154	0.0669331	0.116446	0.11316	0.114683	0.10999	0.087026	0.108261
325	Analyte 362	213	8.44648,0	14	102	0.000692664	0.000308715	0.00033398	0.000552764	5.20543e-07	5.34049e-07	5.22327e-07	0.000385412	0.000499359	4.91404e-07	0.000277496	0.000448356	0.000533865	5.15058e-07	5.40238e-07	7.21909e-07	0.000481944	6.05777e-07	5.12616e-07	0.000682025	4.91404e-07	0.000214958	0.000482451	0.000649376	0.000682565	5.04078e-07	4.84689e-07	0.000363076
326	Analyte 364	221	8.46298,0	17	80	0.00142219	0.0013523	4.39935e-07	0.000965784	5.20543e-07	0.00051621	0.000192937	0.00100248	0.00102628	0.00016815	0.000664728	0.00119152	5.02499e-07	5.15058e-07	0.000359131	7.21909e-07	0.00104104	6.05777e-07	0.00032982	0.00147181	0.00100543	0.00054011	0.00175466	5.07503e-07	5.04078e-07	0.00144668	0.00112182	0.000864834
328	Analyte 367	256	8.47947,0	20	71	4.77128e-07	0.0126934	0.0104771	0.00809987	5.20543e-07	0.00576574	0.00253095	0.0131686	4.19214e-07	0.00326445	0.00560014	0.00799261	0.0147893	0.0143278	0.00190045	7.21909e-07	0.0143666	0.00552774	0.003124	0.0180999	4.91404e-07	0.00801296	0.0168267	0.0153074	0.0161992	0.0153352	0.00783312	0.0143003
329	Analyte 368	0	8.48613,0	25	337	0.00185709	0.00167427	0.00167131	0.00136682	0.00256931	0.000993447	0.00036138	0.00139332	0.00197073	0.000401334	0.0014259	0.00270364	0.00263152	0.0021607	0.000418575	0.00356126	0.00178463	0.00092661	0.000611357	0.00294838	0.00175975	0.00195064	0.00112148	0.00163775	0.00173741	0.00179825	0.0015454	0.00156806
330	Analyte 369	342	8.50469,0	25	115	0.0103102	0.00994732	0.0149232	0.00761925	0.00937502	0.00284631	0.00257927	0.0146764	0.0137591	0.00219285	0.0088229	0.0128442	0.0106331	0.01153	0.00230012	0.0180232	0.0139864	0.00315158	0.00295793	0.00914592	0.00735434	0.00919268	0.00563353	0.00697706	0.00727826	0.00788808	0.00778154	0.0071117
332	3-Hexenedioic acid	252	8.51861,0	25	305	0.0035574	0.00468489	0.00310792	0.00298668	0.00386372	0.00138836	0.000683638	0.00341723	0.00326232	0.000703956	0.00276561	0.00336049	0.00318156	0.00370687	0.000420075	0.00677126	0.0019401	0.00109386	0.000639592	0.00463564	0.00325085	0.00290003	0.0034138	0.00356394	0.00342831	0.00350614	0.00318533	0.00341951
334	aspartic acid 1	865	8.53989,0	25	232	0.0126741	0.0121432	0.0135853	0.0102677	0.00894007	0.00430884	0.00423019	0.0288091	0.0124872	0.00115305	0.0108599	0.0236842	0.016013	0.013943	0.00326186	0.0245918	0.0127706	0.00499333	0.00272134	0.0201013	0.0137671	0.0135848	0.0154492	0.0151731	0.0160242	0.0147293	0.0157859	0.0154323
336	Acetol 1	323	8.56622,0	24	131	0.0265504	0.0270829	0.0268531	0.0221994	0.0281873	0.00881768	0.00522845	0.0293474	0.0252859	0.002133	0.0201685	4.85981e-07	0.0546708	0.0317187	0.0115973	0.0554585	4.7977e-07	0.0106552	5.12616e-07	0.0255465	0.0205261	0.0210175	0.025509	0.0270627	0.02894	0.0284711	0.0356306	0.0291227
337	methionine 1	946	8.5792,0	25	176	0.190058	0.209909	0.162475	0.125286	0.2651	0.0696367	0.0423435	0.160704	0.171893	0.0129805	0.141039	0.380384	0.342957	0.195139	0.113331	0.219256	4.7977e-07	0.0728952	0.324215	0.143741	0.103138	0.189506	0.18146	0.198449	0.212991	0.209964	0.243817	0.209336
338	trans-4-hydroxy-L-proline 2	926	8.58853,0	25	140	0.0698158	0.0741539	0.059828	0.056366	0.0567062	0.018451	0.0115827	0.079896	0.0625209	0.00465907	0.049398	0.0649294	0.0615888	0.0733177	0.00556916	0.150633	0.0489526	0.0139722	0.0429922	0.0746063	0.0498471	0.0586409	0.0416183	0.0447302	0.0485522	0.0435788	0.0543312	0.0465621
340	oxoproline	954	8.62005,0	25	156	1.57789	2.3487	1.50994	1.19002	1.95843	0.993153	0.405841	2.00366	1.50849	0.391185	1.38873	1.84491	1.82575	1.86064	0.466563	3.16326	1.61154	0.469998	1.64117	1.87536	1.42865	1.61878	1.79083	1.83839	1.8809	1.87407	1.98081	1.873
341	unknown	250	8.62422,0	12	447	4.77128e-07	0.00363599	4.39935e-07	4.24611e-07	0.00379483	5.34049e-07	0.000453002	4.47719e-07	0.00212745	0.00167766	0.00116913	4.85981e-07	5.02499e-07	0.00233525	5.40238e-07	7.21909e-07	0.00088336	6.05777e-07	5.12616e-07	0.003883	0.00252076	0.000962574	5.40823e-07	5.07503e-07	0.00202656	0.00238385	0.00282668	0.00144763
343	4-aminobutyric acid 1	228	8.63179,0	25	314	0.0355151	0.0374315	0.0348828	0.0220901	0.0339364	0.0163907	0.00690798	0.0327832	0.0395316	4.91404e-07	0.025947	0.0319422	0.0341467	0.0312373	0.00974046	0.0565714	0.0267813	0.0138708	0.0268823	0.0506462	0.0297387	0.0311557	0.0531386	0.0595564	0.0633091	0.0605588	0.0627214	0.0598568
344	Analyte 384	437	8.64683,0	24	292	0.0041089	0.00369246	0.00299541	0.00233836	0.00328762	0.00127835	0.000950694	0.00424233	0.00344136	0.00051805	0.00268535	0.00528506	0.00473968	0.00317637	0.00103894	0.00481858	0.00332178	0.00118022	0.00145212	0.00571097	0.00245862	0.00331823	0.00556835	5.07503e-07	0.00591339	0.00675454	0.00695981	0.00503932
349	Analyte 390	253	8.68756,0	24	245	0.00189734	0.00294256	0.00195841	0.0013707	0.00126284	0.000707426	0.000613413	0.00338279	0.00195042	4.91404e-07	0.00160864	0.00128223	0.00126491	0.00138213	0.000249469	0.00214875	0.000652591	0.000464788	0.000305473	0.00233221	0.00133125	0.00114138	0.00195905	0.00228536	0.0024642	0.0018853	0.00224476	0.00216774
350	unknown	290	8.70528,0	25	71	0.0833937	0.0805619	0.0706461	0.0786996	0.0666946	0.0320034	0.021331	0.0720452	0.0774023	0.0198962	0.0602674	0.0977521	0.0918192	0.0774949	0.0251551	0.134697	0.0748655	0.0309168	0.0249756	0.113477	0.0600834	0.0731236	0.122985	0.119048	0.116696	0.113465	0.105628	0.115564
351	unknown	271	8.70572,0	24	241	0.00172051	0.00176591	0.00109934	0.00102948	0.00107675	0.000490138	1.03463e-05	0.000978322	0.0013877	4.91404e-07	0.000955898	0.0022109	0.00189407	0.00119013	0.000622092	0.0012339	0.0018277	0.000365935	0.000514882	0.00137534	0.000608943	0.00118439	0.002739	0.00249377	0.00244682	0.00214283	0.00228101	0.00242069
354	Analyte 395	228	8.72688,0	25	263	0.00984647	0.00945795	0.00815831	0.008003	0.00754555	0.00353692	0.00215278	0.00866338	0.00865465	0.00172329	0.00677423	0.0109144	0.0110419	0.008975	0.00259783	0.0151538	0.00688515	0.00304595	0.00250829	0.0123245	0.00704093	0.00804878	0.0118116	0.0126505	0.0128422	0.0131559	0.012131	0.0125182
356	Threonic acid	918	8.74363,0	25	292	0.0224234	0.0188301	0.0189735	0.0182062	0.01538	0.00728177	0.00524264	0.0219465	0.0189798	0.00418635	0.015145	0.0358314	0.0240462	0.0329311	0.0084878	0.0441241	0.0197187	0.00697424	0.00759905	0.0305964	0.0191553	0.0229464	0.0275328	0.0296221	0.030679	0.029893	0.0283932	0.029224
358	N-Methyl-L-glutamic acid 2	248	8.8032,0	25	71	0.0172447	0.0147126	0.0117437	0.0126706	0.00864934	0.00546269	0.00427853	0.0108722	0.012601	0.00360046	0.0101836	0.0116915	0.00881433	0.00636364	0.00434718	7.21909e-07	0.00761227	0.00373152	0.00278771	0.0115067	0.0084592	0.00653148	0.019967	0.021019	0.0108319	0.0103137	0.00884718	0.0141958
361	L-cysteine	914	8.78043,0	25	220	0.0401788	0.0296526	0.0353349	0.0262205	0.0293338	0.0112252	0.00850875	0.0376776	0.0339401	0.00326377	0.0255336	0.0430932	0.0339969	0.0336047	0.0110815	0.0612133	0.0292982	0.0109558	0.00844408	0.0419282	0.0226098	0.0296226	0.0287654	0.0337214	0.0355802	0.0338905	0.0343535	0.0332622
362	creatine	966	8.80619,0	25	115	0.234982	0.235625	0.26268	0.195452	0.142783	0.0994186	0.0665445	0.254535	0.236222	0.0421271	0.177037	0.189826	0.127846	0.22248	0.0516418	0.412567	0.157431	0.0317081	0.0376767	0.163308	0.137478	0.153196	0.123722	0.134526	0.130582	0.111736	0.11476	0.123065
366	unknown	337	8.86906,0	24	247	0.000936536	0.00141979	0.00117017	0.000676609	0.000515512	0.000303819	0.000440668	0.00178302	0.00101531	4.91404e-07	0.000826193	0.00139234	0.00106958	0.000448449	0.000623791	0.00175784	0.000961527	0.000373333	0.000315745	0.00180871	0.000536801	0.000928812	0.00137555	0.00152544	0.00146252	0.00156241	0.00158656	0.0015025
367	Analyte 410	0	8.87886,0	14	217	4.77128e-07	0.00353081	0.00237115	0.00196936	0.00237197	5.34049e-07	5.22327e-07	4.47719e-07	4.19214e-07	4.91404e-07	0.00102462	4.85981e-07	5.02499e-07	0.0022049	5.40238e-07	7.21909e-07	0.00142088	0.000763764	0.000588326	0.00328246	0.00192044	0.0010183	0.00266638	0.00278378	0.00275444	5.04078e-07	4.84689e-07	0.00164112
370	alpha-ketoglutaric acid	920	8.89035,0	25	198	0.0153851	0.022033	0.0182729	0.0112443	0.0124148	0.00314455	0.00428097	0.0176785	0.0188529	0.00292557	0.0126233	0.0230674	0.0215608	0.0069263	0.00855019	0.0326567	0.020813	0.00530445	0.00483546	0.0220403	0.00955807	0.0155313	0.0178907	0.0234614	0.0253232	0.0245974	0.0291025	0.024075
371	3-Methylthiopropylamine	337	8.89904,0	25	268	0.00220585	0.00256402	0.00325069	0.00260188	0.00238329	0.00114728	0.00155589	0.0036055	0.00320235	0.000697138	0.00232139	0.00554029	0.00506395	0.00260522	0.00144328	0.0069671	0.00342671	0.00110287	0.000926167	0.00473611	0.00204242	0.00338541	0.00103413	0.0019997	0.00276289	0.00433615	0.00479988	0.00298655
376	Analyte 419	185	8.96037,0	25	85	0.00269111	0.00231767	0.00214987	0.00365724	0.00241119	0.000805198	0.000603731	0.00206565	4.19214e-07	0.000611096	0.00173132	0.0027986	0.00197467	0.00255883	0.000633338	0.00743772	0.00201176	0.000915296	0.000918164	0.0026374	0.00180413	0.00236899	0.00258485	0.00276646	0.002865	0.0028816	0.00351287	0.00292215
377	threo-beta-hyrdoxyaspartate 2	315	8.97547,0	25	186	0.00308405	0.00346895	0.00277058	0.0018599	0.00190857	0.000710102	0.000578501	0.00405201	0.00335116	0.000421214	0.0022205	0.00370359	0.0036101	0.00223682	0.0016445	0.00447845	0.00443151	0.000929087	0.00146029	0.00177573	0.0011304	0.00254005	0.00362957	0.00408297	0.00455414	0.00461731	0.00633144	0.00464308
378	Analyte 421	403	8.9912,0	20	214	4.77128e-07	0.000632954	0.00143163	0.000627956	0.000418322	5.34049e-07	5.22327e-07	0.000978412	0.000870215	4.91404e-07	0.000496151	0.00133339	5.0125e-05	0.00073882	0.000389033	0.00386808	0.00139524	0.000565432	5.12616e-07	0.00141075	0.00058008	0.00103315	0.00114485	0.00135125	0.00138007	0.00147083	0.00157762	0.00138492
379	Analyte 422	0	8.99595,0	25	217	0.0153767	0.0169986	0.0130642	0.0134756	0.0156483	0.004864	0.00305212	0.0150903	0.0136551	0.00286599	0.0114091	0.0138649	0.0115621	0.0138941	0.00403665	0.0397836	0.0092431	0.00490261	0.00373532	0.0159193	0.00320558	0.0120147	0.0108794	0.012713	0.0134343	0.0130813	0.0151644	0.0130545
381	Analyte 424	311	9.04371,0	23	192	0.0302911	0.0362458	0.0277449	0.0310123	0.0228285	0.014548	0.00618949	0.0122347	0.0268537	4.91404e-07	0.0207949	0.015068	0.0232366	0.0331218	5.40238e-07	7.21909e-07	0.017158	0.00943912	0.00716674	0.031305	0.0203818	0.0156878	0.0508017	0.0592413	0.0619932	0.0596451	0.0749536	0.061327
383	Digitoxose 2	500	9.04624,0	25	204	0.00689817	0.00583729	0.00379831	0.00450436	0.00336962	0.00301386	0.000779266	0.00378017	0.00353578	0.000803446	0.00363203	0.00475201	0.00326961	0.00466381	0.00103337	0.0108908	0.00253164	0.00155377	0.000933048	0.00344642	0.00266142	0.00357359	0.0128796	0.00921817	0.00741599	0.00435355	0.00421796	0.00761705
384	Analyte 427	516	9.05835,0	25	217	0.0263833	0.0206256	0.0121815	0.0155701	0.0129976	0.0132888	0.00253269	0.010511	0.0117751	0.00243603	0.0128302	0.0162725	0.0121368	0.0158729	0.00351467	0.036891	0.00853648	0.00512337	0.00283122	0.0146318	0.00993584	0.0125747	0.0524511	0.0331779	0.0263702	0.0148244	0.0142416	0.028213
387	beta-Glutamic acid 1	472	9.09152,0	25	188	0.00286086	0.0021832	0.00302421	0.00343901	0.00253086	0.00309344	0.00163904	0.00473064	0.00428562	0.00365315	0.003144	0.00426406	0.00238453	0.0033431	0.00120873	0.00907687	0.00325735	0.00163421	0.00121686	0.00535293	0.00389518	0.00356338	0.0157053	0.0147648	0.0152989	0.0134126	0.0162112	0.0150786
388	unknown	443	9.09904,0	25	171	0.00538379	0.00623907	0.00452378	0.00530151	0.0041342	0.00522496	0.00122654	0.00577335	0.00579371	0.00161861	0.00452195	0.00582004	0.00392038	0.006981	0.00194219	0.00991162	0.00519252	0.00160958	0.00131083	0.00567442	0.00303289	0.00453955	0.00536263	0.00568804	0.00579686	0.0056825	0.00805503	0.00611701
390	hexadecane	398	9.1229,0	17	211	0.0238807	0.0208936	4.39935e-07	0.0208278	5.20543e-07	0.021575	5.22327e-07	4.47719e-07	0.00479473	0.00451691	0.00964907	0.0261906	5.02499e-07	0.0185831	5.40238e-07	0.0446732	0.0163526	6.05777e-07	5.12616e-07	0.0261745	0.0145917	0.0146568	0.00676785	0.0206181	0.0230265	0.0134667	0.024259	0.0176276
392	ornithine	856	9.12456,0	24	142	0.0300122	0.030128	0.0363883	0.0298316	0.0259118	0.0220164	0.00852047	0.0292263	0.0385778	0.00738131	0.0257994	0.047339	0.0394971	0.0287821	0.0294841	0.0378213	4.7977e-07	0.0104816	0.0318648	0.021215	0.0123873	0.0258873	5.40823e-07	0.00576694	0.0060172	0.00762795	0.0134228	0.00656708
393	D-erythronolactone 2	293	9.13045,0	25	244	0.0232151	0.0239876	0.0195807	0.0213087	0.0183096	0.02519	0.00561592	0.0230524	0.0179397	4.91404e-07	0.01782	0.0227558	0.0205793	0.021379	0.00939881	0.0469171	0.0203123	0.00833698	0.0148078	0.0231333	0.0147911	0.0202411	0.0108776	0.0156103	0.0179902	0.0183701	0.0267724	0.0179241
394	glutamic acid	807	9.148,0	25	246	0.0087571	0.00785515	0.00854762	0.00746035	0.00549541	0.00849223	0.00340862	0.0083591	0.00717652	0.00117491	0.0066727	0.0134249	0.00848342	0.00705344	0.00501735	0.0171595	0.0103275	0.00333993	0.00690154	0.010599	0.00622885	0.00885354	0.0061274	0.00740647	0.00782762	0.00785887	0.0110339	0.00805085
395	Analyte 439	352	9.15403,0	25	146	0.00716972	0.0109822	0.00867573	0.0096458	0.00570743	0.0112021	0.00142651	0.0110628	0.00991321	0.00171279	0.00774983	0.0053626	0.00417448	0.0089304	0.00214064	7.21909e-07	0.00731696	0.00260971	0.00709375	0.0105898	0.00645968	0.00546787	0.00731317	0.00745269	0.0079641	0.00750655	0.0114509	0.00833748
401	Analyte 445	217	9.19378,0	12	355	0.000599673	4.67764e-07	4.39935e-07	4.24611e-07	0.000224399	0.000567244	0.000198136	0.000367777	0.000292307	4.91404e-07	0.000225136	4.85981e-07	5.02499e-07	5.15058e-07	0.000246852	7.21909e-07	0.000443093	6.05777e-07	5.12616e-07	4.95477e-07	4.91404e-07	6.94276e-05	5.40823e-07	0.000475573	0.000723717	5.04078e-07	0.0010499	0.000450046
402	Analyte 446	254	9.20501,0	25	207	0.0069213	0.00686391	0.0067741	0.00842141	0.00861398	0.0109638	5.22327e-07	0.00756639	0.00701497	0.00177496	0.00649153	0.00783384	0.0059369	0.00672039	0.00188838	7.21909e-07	0.00522773	0.00226511	0.00669629	0.00911236	0.0055689	0.00512506	0.00615314	0.00636715	0.00654697	0.00636899	0.00936207	0.00695966
405	phenylalanine 1	945	9.25221,0	25	218	0.12768	0.1384	0.143279	0.123369	0.148408	0.203566	0.0317358	0.1481	0.138215	0.0254761	0.122823	0.221015	0.196356	0.131292	0.263677	0.0449025	4.7977e-07	0.0578627	0.199443	0.125818	0.0938513	0.133422	0.128918	0.136914	0.140491	0.138706	0.192141	0.147434
406	Analyte 452	273	9.25907,0	23	318	0.00254463	0.0025291	0.0014641	0.00232994	0.00249562	0.00378366	0.000452549	0.0018053	0.00178772	4.91404e-07	0.00191931	0.00128036	0.00145502	0.00220069	0.0011446	0.00117026	0.00108602	0.000604636	0.0012889	0.00243343	0.0017699	0.00144338	0.00120073	0.00138071	0.00138863	0.00140905	4.84689e-07	0.00107592
407	4-Hydroxybenzoic acid	441	9.27183,0	24	143	0.00349247	0.00327184	0.00386559	0.00386626	0.0025799	0.00479299	0.000967027	0.0041142	0.00400792	0.000675696	0.00316339	0.00354559	0.00249692	0.00405445	5.40238e-07	0.00172599	0.000325814	0.000952385	0.00023994	0.00346875	0.0022636	0.0019074	0.00355733	0.00353102	0.00324742	0.00311851	0.00414839	0.00352053
410	unknown	574	9.28741,0	25	403	0.00323842	0.00356149	0.00426398	0.00359465	0.00310344	0.0051425	0.00118734	0.00376876	4.19214e-07	0.000987634	0.00288486	0.00308768	0.00239978	0.0032364	0.0018353	0.00207389	0.00350492	0.00104894	0.00251222	0.00384014	0.00247221	0.00260115	0.00120066	0.00150891	0.00161884	0.00238636	0.00334795	0.00201254
411	unknown	373	9.2946,0	20	260	0.00172008	0.00272112	4.39935e-07	0.00119719	5.20543e-07	0.00248767	5.22327e-07	4.47719e-07	0.00180079	4.91404e-07	0.000992927	0.00219399	0.00306438	0.00217787	0.00105427	0.00116094	0.00261462	0.000731163	0.00323101	0.00302297	0.00126456	0.00205158	0.00165443	0.00177448	0.0018027	0.00190377	0.00247558	0.00192219
412	allose 1	453	9.30219,0	25	204	0.00648168	0.00609651	0.0077704	0.0068037	0.00613272	0.00792021	0.00169042	4.47719e-07	0.00710388	0.00137702	0.0051377	0.00658084	0.00440201	0.00635496	0.00236038	0.00326735	0.00476711	0.00195779	0.00413718	0.00589766	0.00521944	0.00449447	0.0106868	0.0123738	0.0126939	0.0141041	0.0195324	0.0138782
413	Lyxose 1	754	9.30717,0	24	307	0.00147704	0.0012333	0.00111017	0.0012317	0.00102866	0.00176272	0.000410837	4.47719e-07	0.00211578	0.000253581	0.00106242	0.0010731	0.00101642	0.0012815	5.40238e-07	0.000639648	0.000728058	0.000409469	0.000686694	0.00145151	0.00117218	0.000845911	0.00136302	0.00155174	0.00155531	0.00157161	0.00207742	0.00162382
418	unknown	698	9.35243,0	25	248	0.00331367	0.00385123	0.00277937	0.0041153	0.00298681	0.00479199	0.000662998	0.00371704	0.00267835	0.000321956	0.00292187	0.00152188	0.001916	0.00385037	0.00111351	0.00222662	0.00172441	0.00110972	0.0020658	0.00367734	0.00356785	0.00227735	0.00152721	0.00190443	0.00214242	0.00198205	0.00281396	0.00207401
419	4-hydroxyphenylacetic acid	271	9.36667,0	20	214	0.000545689	0.00092683	4.39935e-07	0.00139904	0.00057983	1.49312e-05	5.22327e-07	4.47719e-07	0.00172776	4.91404e-07	0.000519597	0.00152846	0.00170793	0.00136898	0.0008356	0.00144403	0.00186669	0.000790255	5.12616e-07	0.00233901	0.00149163	0.00133731	0.00127594	0.001611	5.04078e-07	0.00201932	0.00253178	0.00148771
421	pyrophosphate 3	664	9.38029,0	23	451	4.77128e-07	0.00190286	0.00104667	0.00118282	0.00100639	0.00216918	0.000452108	0.00074263	0.001053	0.000415974	0.000997211	0.00168625	0.0012434	0.00147515	5.40238e-07	0.000940083	0.00106051	0.000498514	0.000829819	0.00128963	0.00145513	0.0010479	5.40823e-07	0.00086317	0.0018678	0.00149869	0.00199304	0.00124465
422	Analyte 470	210	9.38793,0	19	57	0.0038379	0.00391088	0.00603091	4.24611e-07	0.00416478	0.0071328	5.22327e-07	0.00473992	0.00734781	0.00114091	0.00383069	0.00132817	0.000959919	0.00109605	5.40238e-07	0.00283214	0.00414186	0.00295539	0.00682053	4.95477e-07	0.00734178	0.00274769	0.00789739	5.07503e-07	0.0100911	0.0104633	4.84689e-07	0.00569057
423	lauric acid	513	9.40181,0	25	211	0.00622676	0.00548392	0.00476447	0.00603498	0.0043896	0.00446639	0.000678857	0.00327574	0.00364528	0.00101814	0.00399841	0.00658797	0.00547001	0.00511609	0.00367552	0.00226725	0.00396011	0.00128436	0.00279651	0.00480583	0.00446268	0.00404263	0.00140781	0.00703089	0.0076111	0.00321771	0.00506984	0.00486747
424	Analyte 473	477	9.43099,0	25	234	0.00144731	0.00142595	0.00184133	0.00153188	0.00148694	0.0016462	0.000469338	0.0024579	0.0022335	0.000196835	0.00147372	0.0025643	0.001955	0.00130772	0.00395681	0.000550707	0.00453346	0.000762827	0.00273607	0.00124699	0.00118681	0.00208007	0.00111984	0.00119824	0.00140904	0.00157326	0.00227621	0.00151532
427	asparagine 1	756	9.46239,0	24	231	0.00311513	0.00408307	0.00392999	0.00346933	0.00228448	0.00254512	0.00150368	0.00488153	0.00508001	0.00118893	0.00320813	0.00327882	0.002996	0.00271533	0.00377674	0.00111217	0.00499253	0.000824742	0.00256682	0.00306684	0.00299043	0.00283204	0.00176694	0.00226337	0.00241183	5.04078e-07	0.00388532	0.00206559
428	taurine	919	9.49013,0	25	326	0.166171	0.220543	0.271565	0.277378	0.197454	0.202088	0.218942	4.47719e-07	0.235529	4.91404e-07	0.178967	0.307115	0.289282	0.229973	0.272211	0.11214	0.271864	0.206479	0.136667	0.280924	0.273917	0.238057	0.11094	0.185085	0.224821	0.19396	0.260339	0.195029
429	ribose	456	9.51433,0	20	205	0.00117535	0.00124061	0.00102173	0.00109851	0.000886064	0.000921151	5.22327e-07	4.47719e-07	4.19214e-07	4.91404e-07	0.000634529	0.00098115	5.02499e-07	0.00114969	5.40238e-07	0.000527998	0.00085135	0.000913535	5.12616e-07	0.000823591	0.00104685	0.000629572	0.00118535	0.0011155	0.000993824	0.000597211	0.000564638	0.000891304
430	3-ureidopropionate 2	234	9.52725,0	25	57	0.0145719	0.0151152	0.0166132	4.24611e-07	0.0147815	0.0156058	0.009135	0.0178038	4.19214e-07	0.0157967	0.0119424	0.013951	0.0149019	0.0129947	0.0187302	7.21909e-07	0.019024	0.0200407	0.0121585	0.0172287	0.0214983	0.0150529	0.0171537	0.0181883	0.0165307	0.0192932	0.0217163	0.0185764
431	3-(2-Hydroxyphenyl)propionic acid	255	9.53716,0	23	221	0.00245389	0.00166983	0.00147697	0.0025808	0.0016256	0.00164989	0.000683366	4.47719e-07	4.19214e-07	4.91404e-07	0.00121417	0.0018277	0.00169346	0.00220439	0.00226992	0.000776896	0.00220034	0.00167748	0.00102773	0.00178531	0.00251587	0.00179791	0.00190285	0.00181357	0.00166834	0.0011079	0.00180769	0.00166007
432	Ribonic acid, gamma-lactone	301	9.57043,0	23	279	0.00066129	0.000609943	0.000758599	0.000898849	0.000748575	0.000633771	0.000334052	4.47719e-07	0.00110155	4.91404e-07	0.000574757	0.000839211	0.000779011	0.000851212	0.000848065	0.000282417	0.00103461	0.000850421	0.000675322	0.000953369	0.0013054	0.000841905	5.40823e-07	0.000787909	0.000921289	0.000920423	0.00146872	0.000819776
433	Analyte 483	367	9.5768,0	20	333	0.000694026	0.000794806	0.00079792	0.000921285	0.00079307	0.000570123	0.000318496	4.47719e-07	0.00104497	0.000416452	0.000635159	0.000606171	0.00063641	0.000727349	0.000533162	0.000242067	4.7977e-07	6.05777e-07	5.12616e-07	0.00085748	0.00091896	0.00045232	0.000528966	0.000584899	5.04078e-07	0.000563834	0.000773275	0.000490295
434	cis-1,2-Dihydronaphthalene-1,2-diol	418	9.58128,0	23	306	0.000614701	0.000738559	4.39935e-07	0.000826569	0.00074175	0.000565982	0.000292524	4.47719e-07	4.19214e-07	4.91404e-07	0.000378188	0.000517438	0.000625288	0.000694824	0.000594106	7.21909e-07	0.000468628	0.000640746	0.000454078	0.000633986	0.000829261	0.000545908	0.00045099	0.000582008	0.000701137	0.00062923	0.000741397	0.000620953
436	xylitol	841	9.60539,0	25	217	0.00353933	0.00390088	0.00413342	0.00469926	0.0033149	0.00381751	0.00228096	4.47719e-07	0.00585913	0.00258673	0.00341326	0.00666119	0.0047794	0.00433597	0.00603531	0.00164508	0.00780746	0.00478218	0.00452239	0.00478576	0.00454386	0.00498986	0.00362809	0.00394498	0.00416211	0.00392445	0.00558268	0.00424846
439	Analyte 489	369	9.62949,0	25	171	0.00739611	0.00798731	4.39935e-07	0.0107042	0.00884808	0.00760396	0.00530639	4.47719e-07	4.19214e-07	0.00241026	0.00502576	0.00281529	0.00434045	0.00732903	0.0063777	0.0041117	0.00700749	0.00823376	0.0058073	0.00647394	0.00628331	0.005878	0.00968363	0.0125531	0.0140331	0.0164071	0.0222637	0.0149881
440	Levoglucosan	296	9.64896,0	25	282	0.00780207	0.00958172	0.00982771	0.00999639	0.00805031	0.00800421	0.00483727	4.47719e-07	0.0102629	0.00296772	0.00713308	0.00605405	0.00615693	0.00862657	0.00804541	0.00427482	0.00889194	0.00784702	0.00637658	0.00758675	0.00738728	0.00712473	0.00837156	0.00970591	0.0103718	0.0103192	0.0147925	0.0107122
443	phthalic acid	396	9.66757,0	25	304	0.00214079	0.00420717	4.39935e-07	0.00718398	0.00376674	0.00277727	0.00303133	0.0133416	0.00932687	0.00163351	0.00474097	0.00609392	0.0102704	0.00471686	0.00556584	0.00562232	0.00847062	0.00822582	0.00153912	0.0120026	0.00717042	0.00696779	0.00474561	0.0056591	0.00598469	0.00593276	0.008153	0.00609503
444	unknown	242	9.69272,0	24	71	0.0673983	0.077027	0.118735	0.111943	0.0735369	0.0703201	0.0333767	0.121908	0.0942323	0.0451626	0.0813641	0.085709	0.0739966	0.0671335	0.0822862	7.21909e-07	0.109406	0.100849	0.0516508	0.0797741	0.0884181	0.0739224	0.0673226	0.0770429	0.0763284	0.0647267	0.0744482	0.0719737
449	Analyte 500	210	9.75006,0	24	451	0.000548828	0.000859737	0.000538614	0.000743096	0.000954891	0.000569849	0.000390765	0.000808431	0.000684118	4.91404e-07	0.000609882	0.000517658	0.000687892	0.000811021	0.000800249	0.000288524	0.00055871	0.00030154	0.000618651	0.000653077	0.000576712	0.000581403	0.000454959	0.00038107	0.000373969	0.000463009	0.000572666	0.000449135
455	Analyte 507	363	9.82091,0	25	154	0.188776	0.195759	0.176139	0.25061	0.189528	0.188827	0.143551	0.165953	0.249535	0.149133	0.189781	0.166739	0.178386	0.216468	0.155726	7.21909e-07	0.189411	0.101646	0.132979	0.221222	0.225212	0.158779	0.161045	0.180856	0.202057	0.163119	0.162152	0.173846
458	Diglycerol 2	452	9.85289,0	24	333	0.000632412	0.00088317	0.000777054	0.000887733	0.000891479	0.000582176	0.000573494	0.000668567	0.00110115	0.000514828	0.000751207	0.000633077	0.000532154	0.000840788	0.00051346	0.000387247	0.000441191	0.000269134	0.000436538	0.000812101	4.91404e-07	0.000486618	0.00109015	0.000946443	0.00106516	0.00102676	0.00090023	0.00100575
460	Lyxonic acid, 1,4-lactone	363	9.87215,0	18	174	0.00132994	0.0020018	0.00283607	4.24611e-07	0.00193892	5.34049e-07	5.22327e-07	4.47719e-07	4.19214e-07	4.91404e-07	0.000810957	0.00217316	0.00167733	0.00247069	0.00208821	0.00142214	0.00272126	0.00144223	0.00208633	0.0037741	0.00387709	0.00237325	0.0015052	0.00131636	0.00131282	5.04078e-07	4.84689e-07	0.000827074
461	N-(2-hydroxyethyl)-iminodiacetic acid 1	344	9.88475,0	25	248	0.00572982	0.00693722	0.00734072	0.00800962	0.00661507	0.00584831	0.004819	4.47719e-07	4.19214e-07	0.00546689	0.00507675	0.00536124	0.00581532	0.00750451	0.00578676	7.21909e-07	0.00691321	0.00342601	0.00535846	0.00664553	0.00637935	0.00531911	0.00450656	0.00590411	0.00659554	0.00711633	0.00760684	0.00634588
463	D-(glycerol 1-phosphate)	872	9.93125,0	25	357	0.0240533	0.0257922	0.0265922	0.0305211	0.0317379	0.024251	0.0219861	0.0375726	0.0380495	0.0224478	0.0283004	0.0306484	0.0353267	0.0308272	0.030528	7.21909e-07	0.0246428	0.0296186	0.0232156	0.0377116	0.0332767	0.0275796	0.0278541	0.0324548	0.0349412	0.0316134	0.032754	0.0319235
464	unknown	432	9.93877,0	25	113	4.77128e-07	0.0123674	0.0174933	4.24611e-07	0.0135728	0.0138376	0.0107621	4.47719e-07	4.19214e-07	0.0132896	0.00813245	0.014215	0.0141085	0.01298	0.0126355	7.21909e-07	0.0150909	0.0168321	0.0112085	0.0162997	0.013822	0.0127193	0.0167273	0.0150249	0.0155971	0.0140211	0.014565	0.0151871
466	unknown	641	9.95685,0	25	174	0.00621556	0.00754039	0.00974882	0.0126678	0.00773739	0.00780818	0.00676015	0.0166673	0.01852	0.00607856	0.00997442	0.0115349	0.0100252	0.00814464	0.0192968	0.00275098	4.7977e-07	0.0121845	0.0132837	0.00728754	0.00773092	0.00922396	0.00256268	0.00387972	0.00345042	0.00538606	0.00407585	0.00387094
467	Glucose-1-phosphate	790	9.97008,0	25	217	0.0316934	0.0398483	0.0521459	0.0635835	0.0493558	0.040727	0.0256505	0.0737154	0.0747095	0.0450985	0.0496528	0.0177554	0.0163406	0.0364003	0.0193744	0.0213079	0.018593	0.0374062	0.0207651	0.0542931	0.0612453	0.0303481	0.0626518	0.0661949	0.0686555	0.0685649	0.075632	0.0683398
468	unknown	268	9.97661,0	11	355	4.77128e-07	4.67764e-07	4.39935e-07	4.24611e-07	5.20543e-07	5.34049e-07	6.40085e-05	4.47719e-07	9.5003e-05	8.42488e-05	2.46572e-05	0.000794826	0.00049592	5.15058e-07	0.000620968	7.21909e-07	0.000591645	6.05777e-07	0.00042748	4.95477e-07	4.91404e-07	0.000293367	0.000328543	5.07503e-07	5.04078e-07	0.000376428	0.000267357	0.000194668
470	unknown	641	10.0163,0	25	217	0.0134323	0.0150342	0.0256588	0.0231752	0.0167641	0.016886	0.0189698	4.47719e-07	4.19214e-07	0.0115549	0.0141476	0.0148859	5.02499e-07	0.0172298	0.0173231	0.0128567	0.020081	0.0209652	0.0138102	0.022735	0.0215341	0.0161421	0.0206018	0.0243626	0.026218	0.0187874	0.0198545	0.0219649
472	3,6-Anhydro-D-galactose 4	371	10.0406,0	24	231	0.0139162	0.0119348	0.0149293	0.0160878	0.0208046	0.0164172	0.014404	0.0128473	0.0160151	0.00905615	0.0146412	4.85981e-07	5.02499e-07	0.0177729	0.0435488	7.21909e-07	4.7977e-07	0.0200675	0.0323364	0.0131624	0.01484	0.014173	0.0271226	0.0276288	0.0288057	0.0274637	0.0293777	0.0280797
475	1,3-diaminopropane	408	10.0636,0	13	156	4.77128e-07	0.0580711	0.0923844	0.00762128	5.20543e-07	0.0530729	5.22327e-07	0.00772237	4.19214e-07	4.91404e-07	0.0218874	0.0680633	5.02499e-07	0.0688036	5.40238e-07	7.21909e-07	4.7977e-07	6.05777e-07	5.12616e-07	4.95477e-07	4.91404e-07	0.0136871	0.074926	0.0787511	0.0836036	0.114431	0.149743	0.100291
481	azelaic acid	370	10.1835,0	17	69	4.77128e-07	4.67764e-07	0.00201562	4.24611e-07	0.0018383	0.00136497	5.22327e-07	4.47719e-07	4.19214e-07	4.91404e-07	0.000522214	0.00122585	0.00129043	0.00141219	5.40238e-07	0.000806546	0.00122842	0.00160365	0.0009338	4.95477e-07	0.00177335	0.00102753	0.00136559	0.00126374	0.00112571	0.000670794	0.000668594	0.00101889
482	9-Fluorenone 2	284	10.1716,0	15	145	0.00203191	0.00182203	0.00150354	4.24611e-07	0.00136231	0.00150497	5.22327e-07	0.00119712	0.00126842	4.91404e-07	0.00106917	4.85981e-07	5.02499e-07	0.00138752	5.40238e-07	7.21909e-07	0.000913908	6.05777e-07	5.12616e-07	0.00179447	0.00144905	0.000554832	0.00427841	0.00236172	0.00188515	5.04078e-07	4.84689e-07	0.00170525
484	citric acid	947	10.2499,0	25	273	0.122775	0.154298	0.140579	0.16173	0.119532	0.113549	0.118248	4.47719e-07	0.194068	0.0448143	0.116959	0.144825	0.141363	0.183858	0.182487	0.187506	0.113644	0.190962	0.111487	0.249066	0.218464	0.172366	0.175374	0.188766	0.195712	0.184518	0.179425	0.184759
486	ornithine 1	924	10.2708,0	25	142	0.0980076	0.117384	0.144434	0.181349	0.129456	0.110949	0.108134	0.209817	0.311703	0.0371258	0.144836	0.196091	0.157029	0.114327	5.40238e-07	0.0949145	4.7977e-07	0.176994	0.307429	0.114026	0.102135	0.126295	0.060809	0.0631225	0.0657331	0.068325	0.0787622	0.0673504
487	unknown	298	10.2905,0	19	179	0.000858356	4.67764e-07	0.00140842	0.0014026	0.0010264	0.00119523	0.00108076	4.47719e-07	0.00216269	4.91404e-07	0.000913587	0.00163833	0.00129293	5.15058e-07	0.00208288	0.00129418	0.00175399	0.00121267	0.00116387	4.95477e-07	0.000916493	0.00113564	0.00120407	0.00112089	0.00128941	5.04078e-07	0.00120473	0.000963919
489	citrulline 1	719	10.3127,0	25	157	0.0133295	0.0144841	0.0173072	0.0207947	0.0156383	0.0131567	0.0122294	0.0252201	4.19214e-07	0.00547918	0.0137639	0.01778	0.0155984	0.0134514	0.0278845	0.0113623	0.0334558	0.014592	0.0211164	0.0125638	0.0113326	0.0179137	0.0152202	0.0164498	0.0175474	0.0190594	0.0210473	0.0178648
492	Analyte 554	281	10.356,0	25	156	0.00461275	0.00656207	0.0136219	0.0123382	0.0087522	0.0071409	0.012235	0.0130924	0.0162497	0.00620646	0.0100811	0.00658889	0.00950064	0.00952307	0.0120629	0.0115114	0.0145406	0.00855918	0.00627944	0.0084836	0.0102414	0.00972911	0.00778727	0.0104585	0.0121139	0.0155387	0.0168541	0.0125505
495	Tagatose 1	609	10.3974,0	23	307	9.54256e-07	0.000790516	1.78805e-05	0.000851342	0.000863767	0.000623652	0.000527351	0.000959031	0.00105694	0.000393254	0.000608469	4.85981e-07	0.000345226	0.000463187	5.40238e-07	0.00138903	4.7977e-07	0.000497963	0.000430322	0.000749169	0.000807966	0.000468437	0.000470787	0.000499256	0.000616626	0.000593787	1.07454e-06	0.000436306
496	beta-Mannosylglycerate 2	978	10.4469,0	25	217	0.522754	0.473459	0.429887	0.502882	0.515488	0.435124	0.397691	0.499777	0.519298	0.385315	0.468167	0.502127	0.50153	0.479461	0.434765	0.557545	0.540387	0.442482	0.39914	0.544349	0.431349	0.483313	0.551063	0.538879	0.533373	0.531709	0.53728	0.538461
498	Myristic Acid	936	10.4893,0	25	285	0.00738504	0.00689542	0.0081076	4.24611e-07	0.0144059	0.0147094	0.011538	0.00795525	0.0104782	0.012452	0.00939271	0.00483919	5.02499e-07	0.0154078	0.00909229	0.0173453	0.0078656	0.0116771	0.00901752	4.95477e-07	0.0178653	0.00931112	0.0153368	0.0175769	0.0190504	0.0181102	0.0174145	0.0174978
500	sorbose 1	820	10.5423,0	14	307	4.77128e-07	0.018142	0.0171778	4.24611e-07	0.0226871	5.34049e-07	0.0125318	4.47719e-07	0.0259983	4.91404e-07	0.00965394	0.0150899	0.0156564	5.15058e-07	0.0117459	0.0236355	0.0142644	6.05777e-07	0.00886565	4.95477e-07	0.0264972	0.0115757	0.0362317	0.0383845	0.0419887	0.0204443	0.0183154	0.0310729
501	fructose 1	503	10.5062,0	22	174	0.0535277	0.0543311	0.0570147	4.24611e-07	0.0575368	0.0685663	0.0504179	0.076448	0.106161	0.0569977	0.0581002	0.0856162	0.0868151	0.0704657	0.12212	0.0789735	4.7977e-07	0.0861674	0.0788362	0.0685997	0.078244	0.0755838	5.40823e-07	5.07503e-07	0.0258459	0.0214009	0.0210124	0.013652
505	Allantoic acid 2	526	10.6145,0	20	428	0.000980856	0.00114569	4.39935e-07	0.00135737	0.00129941	0.00128811	0.00105513	4.47719e-07	4.19214e-07	4.91404e-07	0.000712835	0.000875367	5.02499e-07	0.00129501	0.00100803	0.00180422	0.00110356	0.000905548	5.12616e-07	0.00123238	0.00115554	0.000938067	0.000971699	5.07503e-07	5.04078e-07	0.00136024	0.00133904	0.000734399
507	mannose 2	841	10.7091,0	19	59	4.77128e-07	2.24133	2.07133	1.76404	1.89015	1.9848	1.1901	4.47719e-07	2.14431	4.91404e-07	1.32861	1.3599	1.91135	1.75855	1.60078	2.68191	1.43832	6.05777e-07	5.12616e-07	1.78792	4.91404e-07	1.25387	2.43036	1.72563	1.73044	1.74728	2.38562	2.00386
510	unknown	705	10.7983,0	25	103	2.49754	2.60055	2.41738	2.16513	2.72352	2.60867	2.48157	2.19677	2.22534	2.08693	2.40034	2.05401	2.0511	2.53833	2.20306	3.51544	1.7436	2.62407	1.9495	2.50937	2.41757	2.36061	2.5602	2.48589	2.54031	2.47068	2.28992	2.4694
513	lysine	878	10.8403,0	25	174	0.0462665	0.0492864	0.0609212	0.0575362	0.0608365	0.0607073	0.0635741	0.0956707	4.19214e-07	0.0573905	0.055219	0.126308	0.0861957	0.0512511	5.40238e-07	0.0613914	4.7977e-07	0.0841559	5.12616e-07	0.0580679	0.0584098	0.0525782	0.0249958	0.0236083	0.0243267	0.0279084	0.0271982	0.0256075
514	histidine 2	519	10.8588,0	24	71	0.00619692	0.00945485	0.0111286	0.0115687	5.20543e-07	0.0121896	0.0117085	0.0146961	0.00397345	0.0143407	0.00952579	0.00534605	0.0039613	0.0105605	0.00434292	0.0157035	0.0149954	0.0133329	0.00806369	0.00993147	0.0102686	0.00965064	0.0104663	0.00972249	0.00926402	0.00872647	0.00921107	0.00947806
515	D-galacturonic acid 1	682	10.8684,0	24	333	0.0011321	0.00128045	0.00146096	0.00122777	0.00104974	0.00118907	0.00178683	4.47719e-07	4.19214e-07	0.00150377	0.00106315	0.0012347	0.00121831	0.00142778	0.00127724	0.00208103	0.000974118	0.00155789	0.00132718	0.00137626	0.00124663	0.00137211	5.40823e-07	0.00124067	0.00130986	0.00133043	0.00127333	0.00103097
520	tyrosine 1	917	10.9326,0	25	218	0.0523723	0.0698641	0.110307	0.0393115	0.0716155	0.0592144	0.0778079	0.0587305	0.0844361	0.0420783	0.0665738	0.0413911	0.0446295	0.0419849	5.40238e-07	0.0562209	4.7977e-07	0.06806	0.0843597	0.0464452	0.0395378	0.042263	0.0495213	0.053129	0.0527929	0.0572559	0.0626216	0.0550641
521	unknown	513	10.9649,0	16	318	0.00124946	0.000997011	4.39935e-07	0.00115645	5.20543e-07	0.00171449	5.22327e-07	4.47719e-07	4.19214e-07	4.91404e-07	0.000512025	0.00297776	0.002867	0.00279241	0.00426739	7.21909e-07	0.00402875	0.00249598	0.00488953	0.00158716	4.91404e-07	0.00259072	0.00253141	0.00209783	5.04078e-07	0.00234092	0.00215763	0.00182566
522	conduritol b epoxide 2	691	10.9695,0	25	217	0.0321775	0.0434927	0.0469579	0.0351905	0.0435028	0.0362582	0.0445949	0.0437226	0.0415954	0.0375083	0.0405001	0.0231616	0.0261742	0.0379293	0.0311875	0.0584253	0.0272326	0.0383519	0.0350919	0.0401647	0.0413887	0.0359108	0.0338967	0.0328874	0.0351157	0.0371533	0.0381903	0.0354487
523	pentadecanoic acid	438	10.9843,0	16	299	4.77128e-07	0.000171886	4.39935e-07	0.000232736	0.000244348	0.000251091	0.000352216	0.000185135	0.000214659	0.000233215	0.00018862	4.85981e-07	5.02499e-07	0.000217807	5.40238e-07	7.21909e-07	4.7977e-07	0.00024659	5.12616e-07	4.95477e-07	0.000291935	7.60071e-05	0.000339559	0.000287003	0.000307226	0.000325393	0.000333776	0.000318591
526	unknown	606	11.0131,0	25	292	0.0020631	0.00167088	0.00191999	0.00166403	0.00138708	0.00170316	0.00243321	0.00220643	4.19214e-07	0.00251643	0.00175647	0.00116384	5.02499e-07	0.00219851	0.00201335	0.00286883	0.00152817	0.00233409	0.00196787	0.001931	0.00198992	0.00179961	0.00207024	0.0017341	0.00185956	0.00207828	0.00229572	0.00200758
527	Analyte 596	666	11.039,0	25	217	0.0335529	0.0495084	0.0533612	0.0409559	0.0467266	0.0394352	0.0523582	0.0578901	0.0497674	0.0496866	0.0473243	0.0233387	0.0255024	0.0390273	0.0335349	0.0670424	0.0285493	0.0434808	0.03862	0.0405293	0.0480597	0.0387685	0.02316	0.0284532	0.0321138	0.0356179	0.0443182	0.0327326
528	lipoic acid	301	11.0509,0	25	71	0.00900363	0.0100187	0.00903675	0.00998003	0.0102613	0.0108486	0.0115097	0.0109134	0.00899701	0.0119322	0.0102501	0.00844426	0.00796863	0.00945578	0.00909871	0.0152944	0.00854495	0.0127046	0.011717	0.00901525	0.0108798	0.0103123	0.00871906	0.00796642	0.00864808	0.00873333	0.0101704	0.00884745
530	canavanine 1	349	11.0907,0	24	204	0.000666981	0.000845326	0.00102613	0.000846346	0.00106828	0.000992364	0.00116934	0.00107208	0.00101269	0.00115069	0.000985022	0.000662846	0.000689841	0.00107464	0.000858354	0.000903616	0.000918417	0.00115535	0.00118494	0.00105264	0.000943411	0.000944406	5.40823e-07	0.000271997	0.00081712	0.000874879	0.00108979	0.000610865
532	pantothenic acid	532	11.1712,0	24	291	4.77128e-07	0.000138603	0.000323319	0.00024882	0.000436058	0.000356884	0.000218761	0.000406568	0.000193888	0.000158514	0.000248189	0.000155202	0.000182217	0.000298855	0.000422343	0.000421293	0.000391355	0.000362295	0.000359786	0.00022919	0.000311618	0.000313415	0.000237862	0.000276765	0.000157284	0.00033363	0.000242705	0.000249649
533	Analyte 603	308	11.1963,0	22	159	0.000276814	0.000137386	0.000210043	0.00013262	0.0002449	0.000258789	0.000287652	4.47719e-07	0.000159996	0.000226493	0.000193514	4.85981e-07	5.02499e-07	0.000254378	0.000218917	0.000263335	0.000192429	0.000221891	0.000252326	0.000144663	0.000191635	0.000174056	0.000298304	0.000290545	0.000185476	0.000217234	0.0001841	0.000235132
534	Analyte 604	199	11.2326,0	24	293	0.000383537	0.000264393	0.000297631	0.000287328	0.000412566	0.00042473	0.000309308	0.000495704	0.000485195	0.000467719	0.000382811	0.000288569	0.000189422	0.000276116	0.000371259	0.000414934	0.000299518	0.00051933	0.000352909	0.000448555	0.000278479	0.000343909	5.40823e-07	0.000164649	0.000215521	0.000405598	0.000436146	0.000244491
535	Saccharic acid	465	11.2474,0	24	333	0.000267818	4.67764e-07	0.000209905	0.000261676	0.000156449	0.00023099	0.000320907	0.000175553	0.000271898	0.000334926	0.000223059	0.000271617	0.000180836	0.000209	0.000488567	0.000317108	0.000319808	0.00037594	0.00041777	0.000279999	0.000197155	0.00030578	0.000269687	0.000241592	0.00024047	0.000288066	0.000237577	0.000255478
536	Analyte 606	275	11.2587,0	16	71	0.000780013	0.000358058	4.39935e-07	0.000961361	5.20543e-07	0.000684284	5.22327e-07	4.47719e-07	4.19214e-07	0.00103397	0.000382003	4.85981e-07	0.000525702	0.000787614	5.40238e-07	0.00126268	0.000480263	6.05777e-07	0.000811627	0.000778602	0.000671429	0.000531955	0.000938198	0.000582377	0.000797283	5.04078e-07	0.00105312	0.000674296
537	gluconic acid 1	556	11.2791,0	25	204	0.00374163	0.00444701	0.00460111	0.00470275	0.00483843	0.00393622	0.00473271	0.00559466	0.00460006	0.00473131	0.00459259	0.0020315	0.00211221	0.00416445	0.00315737	0.00693917	0.00245185	0.0045688	0.00374707	0.00468221	0.00493553	0.00387902	0.00431549	0.00372586	0.00386567	0.00448675	0.00458824	0.0041964
539	unknown	378	11.3102,0	25	318	0.000517526	0.00055165	0.000534697	0.000523167	0.00041299	0.000379082	5.22327e-07	0.0006516	0.000648882	0.000447267	0.000466738	0.000290354	0.000390011	0.000609538	0.000525534	0.000801754	0.000558518	0.000685441	0.000604046	0.000675266	0.000549742	0.00056902	0.000580721	0.000591457	0.000557632	0.000497548	0.000634578	0.000572387
540	unknown	368	11.3144,0	16	393	4.77128e-07	0.000177645	4.39935e-07	4.24611e-07	5.20543e-07	5.34049e-07	0.00020913	0.000254031	0.000215782	4.91404e-07	8.59476e-05	0.000101318	5.02499e-07	0.000184566	5.40238e-07	7.21909e-07	0.000270239	0.000333222	5.12616e-07	0.00024073	0.00017652	0.000130887	0.000185249	0.000158456	0.000204389	0.000125716	0.000158595	0.000166481
541	palmitoleic acid	904	11.372,0	25	117	0.00230028	0.00336663	0.00339987	0.00596714	0.00617841	0.00359531	0.0107473	0.00381949	0.00325157	0.00792053	0.00505465	0.0013244	0.0109705	0.00664903	0.00494526	0.00921726	0.00225194	0.00807142	0.0063956	0.011132	0.00712866	0.0068086	0.00471612	0.0068151	0.00633934	0.00650654	0.00658009	0.00619144
543	palmitic acid	965	11.4678,0	25	117	0.373511	0.380922	0.664281	0.725272	0.534141	0.563731	0.88558	0.541711	0.525318	0.776766	0.597123	0.193709	0.936803	0.554858	0.439375	0.875062	0.363079	0.741188	0.624004	0.760505	0.710104	0.619869	0.420427	0.721744	0.665276	0.552365	0.736714	0.619305
546	myo-inositol	932	11.6314,0	25	217	0.0294481	0.029136	0.0395633	0.0315274	0.0241177	0.0301426	0.0514056	4.47719e-07	0.0369727	0.0285252	0.0300839	0.0298569	0.027926	0.0298233	0.0462043	0.0461629	0.0368929	0.0404794	0.0338017	0.0352287	0.0302308	0.0356607	0.0331093	0.034313	0.0328369	0.0346814	0.0339256	0.0337732
547	uric acid	880	11.6599,0	25	441	0.00171322	0.00219885	4.39935e-07	0.00255199	0.00149313	0.00181382	0.00350194	4.47719e-07	0.00247783	0.00225595	0.00180076	0.000543822	0.00131501	0.00117572	0.00159456	0.00247684	0.00101789	0.00181527	0.00121566	0.00178574	0.00150914	0.00144497	0.00179193	0.00222883	0.00160035	0.0018269	0.00198887	0.00188737
548	Analyte 619	225	11.6926,0	23	57	0.00177223	0.00245699	0.00188404	0.00271187	0.00199807	0.00172718	0.00202492	0.00241042	0.00198253	0.00295395	0.00219222	0.00117333	0.00192837	0.00195249	0.00136445	0.00196802	0.00202976	0.00241285	0.00271767	0.00202692	0.00209554	0.00196694	5.40823e-07	5.07503e-07	0.000949909	0.00196319	0.00236452	0.00105573
552	Linoleic acid methyl ester	557	11.7543,0	25	67	0.000306462	0.00033738	0.00397999	0.00196176	0.00251972	0.00204685	0.00445017	0.00287177	0.00335242	0.00468629	0.00265128	0.000303195	0.000610035	0.00146794	0.00317579	0.00289375	0.00086597	0.00279083	0.00333869	0.0033495	0.00303596	0.00218316	0.00457883	0.00400877	0.00362549	0.00374427	0.00490662	0.0041728
554	indole-3-acetamide 1	228	11.7764,0	24	203	0.000366571	0.000329003	0.000357898	0.000383757	0.000298341	0.000358016	0.000349707	0.000376873	0.000396877	0.000384886	0.000360193	0.000178498	0.000180252	0.000391074	0.000228881	0.000316161	0.000247363	6.05777e-07	0.000351595	0.000345228	0.000298001	0.000253766	0.000288693	0.000292772	0.000320128	0.000288319	0.000372614	0.000312505
561	heptadecanoic acid	776	11.9244,0	25	117	0.000632933	0.000857303	0.00111696	0.00121799	0.000883932	0.00116993	0.00128311	0.00122717	0.00102032	0.00128149	0.00106911	0.000694767	0.000757779	0.000837098	0.000627398	0.00171061	0.000393925	0.00143685	0.000910372	0.00132138	0.00134399	0.00100342	0.00109098	0.00136284	0.00156868	0.00134194	0.0015344	0.00137977
564	Analyte 636	304	12.0418,0	25	71	0.00440075	0.00544924	0.00737692	0.00631099	0.00602869	0.00544803	0.00660887	0.00588859	0.00622692	0.00729376	0.00610328	0.00503277	0.00418918	0.00557	0.00335205	0.00867412	0.00358632	0.0068124	0.00767491	0.00533836	0.0059437	0.00561738	0.00496055	0.00623677	0.00575853	0.00594591	0.00673531	0.00592742
566	Indolelactate 2	593	12.0673,0	25	202	0.000313942	0.000492736	0.0006912	0.000371427	0.000447416	0.000368285	0.000485352	0.00110775	0.000531617	0.000318433	0.000512816	0.001734	0.00111822	0.00042012	0.0011511	0.00054101	0.00114788	0.00090924	0.00179969	0.000336401	0.000273866	0.000943154	0.000733659	0.000695418	0.000697423	0.000912424	0.000763909	0.000760566
568	Fructose 2,6-biphosphate degr prod 2	675	12.1774,0	25	73	0.0814641	0.0807727	0.133153	0.0928621	0.0933874	0.0814317	0.151736	0.141957	0.136991	0.106117	0.109987	0.107982	0.0954887	0.0728584	0.106066	0.126922	0.0803717	0.115554	0.102345	0.139078	0.0808895	0.102756	0.0950121	0.0975217	0.109532	0.11678	0.124241	0.108617
569	3-Indolepyruvic acid	251	12.2138,0	25	314	0.00161028	0.00212726	4.39935e-07	0.0021328	0.00181643	0.00182741	0.0041534	0.00298356	4.19214e-07	0.00215348	0.00188055	0.00237265	0.0020712	0.0017126	0.00264721	0.00256539	0.0024343	0.00318681	0.00265179	4.95477e-07	0.00218189	0.00218243	0.00235093	0.00218411	0.00240528	0.00286095	0.00291806	0.00254386
570	linoleic acid	918	12.2436,0	25	337	0.00340224	0.00503461	0.00592609	0.0076984	0.00755573	0.00842122	0.00998594	0.00601538	0.00555583	0.0101989	0.00697944	0.00244369	0.00527011	0.00977159	0.00268716	0.0130535	0.00222196	0.00961168	0.0035223	0.0126952	0.0110346	0.00723118	0.00449208	0.00722931	0.00780299	0.00756697	0.0077427	0.00696681
572	Elaidic acid	807	12.2645,0	25	202	0.0326557	0.0584619	0.09333	0.0252665	0.0476502	0.0264493	0.0555015	0.0756819	0.071151	0.055444	0.0541592	0.0662972	0.0619292	0.0349498	0.0914391	0.0452352	0.0992879	0.0698502	0.0764073	0.0404307	0.0294359	0.0615263	0.0306844	0.0428148	0.0444186	0.0444456	0.0458798	0.0416486
573	unknown	466	12.2709,0	22	422	0.000600504	4.67764e-07	0.000888197	0.0007049	0.000684954	0.000820533	5.22327e-07	0.000692003	0.000844922	0.000874609	0.000611161	4.85981e-07	0.000672968	0.000661092	0.000475682	0.00101767	0.000415301	0.00056762	0.000627766	0.000617597	0.000789562	0.000584575	0.00052941	0.000675155	0.000685776	0.000576782	0.000491604	0.000591745
575	unknown	252	12.3364,0	25	131	0.00213258	0.00206619	0.00410927	0.00306439	0.00299116	0.003175	0.00351996	0.00338113	0.00332728	0.00423127	0.00319982	0.00296465	0.00356863	0.00363725	5.40238e-07	0.00573027	0.00174232	0.0042133	0.00352999	0.00303609	0.00361942	0.00320425	0.00177937	0.00227835	0.00342357	0.0035489	0.0036079	0.00292762
576	Analyte 648	0	12.3561,0	23	103	0.00180016	0.00243537	4.39935e-07	0.00106332	0.00275024	0.00253492	0.0029671	0.00330225	0.00309987	0.00281942	0.00227731	0.00306723	0.00144676	0.00307168	0.00380752	0.00418861	0.00380377	0.00401334	0.00419683	0.00119739	0.00248793	0.00312811	5.40823e-07	0.00211889	5.04078e-07	0.002572	0.0016795	0.00127429
577	stearic acid	928	12.3715,0	25	132	0.0582917	0.0721891	0.0857592	4.24611e-07	0.084921	0.113904	0.0872584	0.0801501	0.0764999	0.0971932	0.0756167	0.0730969	0.123213	0.0945881	0.0710518	0.120991	0.0602855	0.104973	0.0930022	0.102503	0.0872791	0.0930983	0.0507579	0.0950086	0.102749	0.0995022	0.143841	0.0983717
578	trans-sinapinic acid	265	12.3895,0	15	221	0.000231452	0.000311721	0.000238328	4.24611e-07	5.20543e-07	5.34049e-07	0.000417212	0.000314461	0.000345354	0.000400124	0.000226013	0.000385367	0.000474303	0.000328503	5.40238e-07	0.000314486	4.7977e-07	6.05777e-07	0.000396256	4.95477e-07	4.91404e-07	0.000190153	0.000202746	0.000287509	0.000257611	5.04078e-07	4.84689e-07	0.000149771
583	Methyl yellow	368	12.5089,0	15	105	4.77128e-07	4.67764e-07	0.000513529	4.24611e-07	5.20543e-07	5.34049e-07	0.000166578	4.47719e-07	0.000371627	0.000176233	0.000123084	4.04585e-05	0.000435902	0.000161391	5.40238e-07	7.21909e-07	4.7977e-07	0.000409649	5.12616e-07	0.00027238	0.000104327	0.000142636	0.000425024	0.000511567	0.000670573	0.000532266	0.000529436	0.000533773
584	cystine	778	12.5583,0	25	218	0.000500377	0.000535986	0.0016942	0.000635021	0.000749928	0.000305471	0.000877241	0.000949455	4.19214e-07	0.000300472	0.000654857	4.85981e-07	0.00175207	0.000860822	0.00121658	0.00134176	0.000878734	0.00134428	0.00187211	0.000960742	0.00087038	0.0011098	0.00041067	0.000424646	0.000533308	0.000746903	0.00104889	0.000632884
585	Analyte 658	365	12.5664,0	15	204	4.77128e-07	0.000138299	0.00018251	0.000175597	5.20543e-07	5.34049e-07	5.22327e-07	4.47719e-07	0.000163579	4.91404e-07	6.62979e-05	4.85981e-07	5.02499e-07	0.000245707	0.000778667	7.21909e-07	0.000518929	0.000453273	0.00070878	4.95477e-07	4.91404e-07	0.000270805	5.40823e-07	0.000250305	0.000211616	0.000197466	0.00032337	0.000196659
586	Analyte 659	473	12.611,0	25	73	0.00185018	0.00510729	0.00583879	0.00325771	0.00398221	0.00308618	0.00590666	0.00397071	0.00499695	0.0057355	0.00437322	4.85981e-07	0.00646609	0.00293501	0.00397786	0.00479235	0.004721	0.00518423	0.0048798	0.00368881	0.0049886	0.00416342	0.0020186	0.00180072	0.00164571	0.00158118	0.00223095	0.00185543
587	Analyte 660	159	12.6298,0	24	57	0.00100283	0.00179393	0.001545	0.00192824	0.00170209	0.00269857	0.00273227	0.0026643	0.00286016	0.00296491	0.00218923	0.00451742	5.02499e-07	0.00126496	0.00171696	0.00334436	0.00189324	0.00363336	0.00160593	0.00235112	4.91404e-07	0.00203284	0.00109805	0.00166677	5.04078e-07	0.00181428	0.00261021	0.00143796
588	Atropine	312	12.6547,0	24	67	0.000898779	0.00142345	0.00134869	0.000685939	0.00102033	0.000881904	0.00118055	0.00114016	0.00112056	0.00107754	0.00107779	4.85981e-07	5.02499e-07	0.000956479	0.000722169	0.00134418	0.000710475	0.00141726	0.000968385	0.0010245	0.000957373	0.000810181	5.40823e-07	0.00149124	0.00154247	0.00167242	0.00171573	0.00128448
590	Phenyl beta-D-glucopyranoside	494	12.6798,0	25	217	0.00241701	0.00435766	0.00548504	0.00345596	0.00307878	0.00325403	0.00655309	0.00541054	0.00596439	0.00390492	0.00438814	0.00692619	0.00726985	0.00283463	0.0015447	0.00782537	0.0013498	0.00524063	0.00233182	0.00428834	0.00431391	0.00439252	0.00289991	0.00288473	0.00291227	0.0027604	0.00398101	0.00308766
593	Analyte 666	306	12.7781,0	24	71	0.00263507	0.00332004	0.00433109	0.0040113	0.00343496	0.00294668	0.00427285	0.00448269	0.00402371	0.0043076	0.0037766	4.85981e-07	5.02499e-07	0.00226818	0.00206668	0.00558246	0.00198799	0.00434353	0.00385113	0.00322071	0.00418775	0.00275094	0.0148748	0.0153382	0.0162342	5.04078e-07	0.00268819	0.00982719
594	glucose-6-phosphate 2	436	12.7825,0	20	73	0.00478994	0.00483028	4.39935e-07	0.00528901	0.00520775	0.00352537	0.00530204	0.00843149	0.00573367	0.00439196	0.0047502	4.85981e-07	5.02499e-07	0.00367691	0.00327728	0.00633612	0.00245447	0.00646176	5.12616e-07	0.00613535	0.00315696	0.00315003	0.0115629	0.0117458	0.00780905	5.04078e-07	4.84689e-07	0.00622374
595	Analyte 668	315	12.7953,0	20	117	4.77128e-07	0.000714525	0.000518974	0.000522265	0.000420865	0.000385901	0.000592367	0.000676368	0.000523272	0.000993861	0.000534887	4.85981e-07	5.02499e-07	5.15058e-07	5.40238e-07	0.000542872	0.000470578	0.000623423	5.12616e-07	0.000756095	0.000440136	0.000283566	5.40823e-07	0.000632012	0.000621137	0.000603719	0.00111495	0.000594471
596	arachidonic acid	869	12.9358,0	25	80	0.00160827	0.00212895	0.00316698	0.00217031	0.00199913	0.00189709	0.00321902	0.00240647	0.0027706	0.00329634	0.00246632	4.85981e-07	5.02499e-07	0.00227521	0.00133258	0.00402829	0.0011274	0.00170137	0.00101642	0.00338096	0.00297232	0.00178355	0.00114893	0.00210921	0.00194144	0.0017314	0.002447	0.0018756
597	Analyte 670	283	12.9526,0	25	71	0.00324269	0.00426536	0.00592417	0.00519526	0.00347394	0.00360109	0.00588973	0.0052611	0.00549872	0.00674498	0.0049097	4.85981e-07	5.02499e-07	0.00354134	0.00434126	0.00700214	0.00294332	0.00448346	0.00372277	0.00560139	0.00542379	0.00370605	0.00280687	0.00371806	0.00399382	0.00467165	0.00458635	0.00395535
600	Analyte 673	160	13.0028,0	25	159	0.000443174	0.000631613	0.00084069	0.000797649	0.000598115	0.000437813	0.000791477	0.000596748	0.000659629	0.000859281	0.000665619	4.85981e-07	5.02499e-07	0.000420497	0.000480205	0.00100537	0.000603671	0.000659858	0.000471321	0.000649353	0.000638787	0.000493005	0.000503551	0.000490682	0.000523554	0.000623745	0.000664013	0.000561109
601	Abietic Acid 2	386	13.0193,0	24	67	0.000648434	0.00125768	0.000963741	0.000991952	0.00118658	0.000608255	0.0016155	0.000960574	0.00122403	0.00139849	0.00108552	4.85981e-07	5.02499e-07	0.00110876	0.00115347	0.00229803	0.000617657	6.05777e-07	0.000751315	0.00197841	0.0011219	0.000903114	0.00077934	0.000919215	0.00155709	0.00111884	0.00162384	0.00119967
603	Analyte 676	656	13.0474,0	25	318	0.00310584	0.00447762	0.00456612	0.00339233	0.00267141	0.00270875	0.00462976	0.00241263	0.00417263	0.00380608	0.00359432	4.85981e-07	5.02499e-07	0.00374366	0.00421063	0.00572458	0.00360776	0.00298179	0.00260845	0.00268596	0.0032772	0.0028841	0.00361691	0.00329609	0.00338075	0.00277993	0.00314613	0.00324396
606	cis-gondoic acid	745	13.1133,0	25	117	0.000204221	0.000527504	0.000988656	0.00144158	0.000881852	0.000985302	0.00135871	0.00111212	0.000723105	0.00233669	0.00105597	4.85981e-07	5.02499e-07	0.00143196	0.000930195	0.00223051	0.00063637	0.000764167	0.000155859	0.00137546	0.00149018	0.000901568	0.000895009	0.000943652	0.00108123	0.00123243	0.00170716	0.0011719
608	unknown	295	13.1905,0	24	187	0.000703036	0.000630188	0.00115085	0.00100582	0.000745512	0.000936405	0.00116712	0.00102366	0.00104853	0.00126949	0.000968061	4.85981e-07	5.02499e-07	0.000694374	0.000825846	0.00114575	0.000926598	0.000897333	0.000731376	0.000681305	0.00103942	0.000694298	0.0007895	0.000774895	5.04078e-07	0.000763386	0.000901408	0.000645939
609	Arachidic acid	808	13.2068,0	25	117	0.000793269	0.00102301	0.00171463	0.0020499	0.00174693	0.00214156	0.00187301	0.00221744	0.00147078	0.00260296	0.00176335	4.85981e-07	5.02499e-07	0.00125631	0.00216231	0.0018851	0.00206212	0.00100244	0.00103925	0.00170294	0.00196568	0.00130771	0.0021465	0.00253889	0.00223633	0.00214915	0.00243552	0.00230128
610	D-erythro-sphingosine 1	414	13.2272,0	19	204	0.000243157	0.000238895	0.000308937	0.000197443	5.20543e-07	0.000253936	0.000318644	0.000368466	0.000186229	4.91404e-07	0.000211672	4.85981e-07	5.02499e-07	0.000200495	0.00021047	0.00041301	0.000136125	6.05777e-07	5.12616e-07	4.95477e-07	4.91404e-07	9.63194e-05	0.000494464	0.000453307	0.000380652	0.000430594	0.000339919	0.000419787
611	Analyte 686	387	13.2887,0	25	73	0.00251675	0.00365306	0.00493856	0.001924	0.0023307	0.00245277	0.00469871	4.47719e-07	0.00332541	0.00317183	0.00290122	4.85981e-07	5.02499e-07	0.0031211	0.00383097	0.005257	0.00390598	0.00328608	0.00239423	0.0017796	0.00261108	0.0026187	0.00242628	0.0029077	0.00346516	0.00257333	0.00349489	0.00297347
613	Analyte 690	455	13.3892,0	25	73	0.00308404	0.00424431	0.00626356	0.00246853	0.00409127	0.00312805	0.00447153	4.47719e-07	0.00378725	0.00288624	0.00344252	4.85981e-07	0.00913202	0.00404716	0.00697505	0.00413255	0.00547272	0.00302428	0.00252772	0.00297539	0.00248126	0.00407686	0.00327075	0.00304648	0.00328323	0.00405225	0.00277497	0.00328553
615	Analyte 693	317	13.5101,0	20	55	0.00464328	4.67764e-07	0.00244579	0.000971582	0.00429205	0.00211277	0.00383151	4.47719e-07	0.00631723	0.00845758	0.00330727	0.012777	5.02499e-07	5.15058e-07	0.00328413	7.21909e-07	4.7977e-07	0.00455431	5.12616e-07	0.00329131	0.00681322	0.00307228	0.00782663	0.00948362	0.00969759	0.00806006	0.0082485	0.00866328
616	piceatannol 2	381	13.5538,0	19	221	0.000202746	2.28108e-05	8.88165e-06	4.24611e-07	5.20543e-07	0.000237625	0.000296379	0.00021193	3.42066e-05	2.52658e-06	0.000101805	4.85981e-07	8.84087e-06	0.000205219	1.20612e-06	3.49585e-05	8.11782e-05	6.05777e-07	5.12616e-07	1.50403e-05	4.91404e-07	3.48538e-05	5.40823e-07	0.000267898	0.000272612	0.000180829	2.21895e-05	0.000148814
618	Analyte 696	252	13.6301,0	25	71	0.00195527	0.00121785	0.00259845	0.00228673	0.00118132	0.00258565	0.002567	0.00214094	0.00221547	0.00271433	0.0021463	4.85981e-07	5.02499e-07	0.00225293	5.40238e-07	0.0030944	4.7977e-07	0.00316718	0.00251026	0.0019785	0.00172829	0.00147336	0.00427424	0.00482605	0.00531438	0.0051804	0.00263425	0.00444586
619	arbutin	492	13.6677,0	18	217	0.000122262	0.000911669	0.000759524	4.24611e-07	5.20543e-07	0.000246087	0.000250871	4.47719e-07	0.000351428	0.000207545	0.000285078	4.85981e-07	8.85313e-05	5.15058e-07	0.00120492	0.000196243	0.000149207	0.000200064	0.000123754	4.95477e-07	4.91404e-07	0.00019647	0.000334786	0.000271005	0.000392146	0.000302085	4.84689e-07	0.000260102
620	androsterone 1	561	13.7042,0	25	91	0.00172456	0.00146504	0.00239434	0.00138708	0.00222886	0.00281825	0.00290222	0.00277585	0.00249675	0.00313013	0.00233231	0.00341331	0.00306576	0.0027321	5.40238e-07	0.00361195	0.00352256	0.00279974	5.12616e-07	0.00285331	0.00242788	0.00244277	0.00128051	0.00188982	0.00210275	0.00227336	0.00178756	0.0018668
621	1-Monopalmitin	531	13.7482,0	23	371	0.000186109	0.000102078	0.000128494	0.000135974	0.00014678	0.000238991	0.000162363	0.000311865	0.000215186	0.000250552	0.000187839	4.85981e-07	5.02499e-07	0.00025864	5.40238e-07	0.000380519	4.7977e-07	6.05777e-07	5.12616e-07	0.0001939	0.000251359	0.000108755	0.000318358	0.000363142	0.000270053	0.000233887	0.000284106	0.000293909
622	kyotorphin 2	305	13.7662,0	22	285	0.000342126	0.000161249	0.000240342	0.000140878	0.000168898	0.000317223	0.000169293	0.000144493	0.00016512	0.000176934	0.000202656	4.85981e-07	5.02499e-07	0.00027485	5.40238e-07	0.000410323	0.000483637	0.000207385	0.000139528	4.95477e-07	0.000228072	0.000174582	0.00021677	0.000434861	0.000282171	5.04078e-07	4.84689e-07	0.000186958
624	Analyte 702	254	13.7946,0	24	159	0.000399217	0.000250454	0.000404071	0.000256073	0.000292091	0.000556546	0.000295652	0.000362172	4.19214e-07	0.000316503	0.00031332	4.85981e-07	0.000725126	0.000386323	5.40238e-07	0.000383107	4.7977e-07	0.000336683	0.00030177	0.000200088	0.00035579	0.000269039	0.000300698	0.000306287	0.000278541	0.00037297	0.000244102	0.000300519
625	Analyte 703	283	13.791,0	24	71	0.00238647	4.67764e-07	0.00237364	0.0028639	0.00211723	0.00315893	0.00249553	0.00186846	0.00213855	0.00266274	0.00220659	4.85981e-07	5.02499e-07	0.00283463	5.40238e-07	0.00293867	4.7977e-07	0.00270841	0.00251578	0.00171848	0.00195795	0.00146759	0.000496968	0.00321044	0.00270587	0.00308913	0.00319017	0.00253851
626	Alizarin	267	13.8742,0	21	192	0.00100724	0.000418729	0.000318074	0.000600314	5.20543e-07	5.34049e-07	0.00149795	0.00103742	4.19214e-07	0.000502603	0.000538381	4.85981e-07	0.00274482	0.000926429	5.40238e-07	0.000676046	4.7977e-07	0.00110683	0.00254679	0.000500338	0.000310212	0.000881298	0.000865301	0.000837329	0.000817972	0.000914686	0.00068706	0.00082447
627	sucrose	809	13.8877,0	25	361	0.000571098	0.000437089	0.00120152	0.000261642	0.000488538	0.0010415	0.000862304	0.00328178	0.000411424	0.000271378	0.000882826	4.85981e-07	5.02499e-07	0.0008941	5.40238e-07	0.000230535	4.7977e-07	0.00190197	0.000817319	0.000173815	0.000276466	0.000429621	0.00140535	0.00117182	0.00109755	0.00109273	0.000764706	0.00110643
628	Behenic acid	690	13.9814,0	12	117	0.0011553	4.67764e-07	4.39935e-07	4.24611e-07	0.000323604	0.00102771	5.22327e-07	4.47719e-07	4.19214e-07	4.91404e-07	0.000250983	0.000993059	0.00058799	0.00114453	0.00201956	7.21909e-07	0.00147406	6.05777e-07	5.12616e-07	4.95477e-07	4.91404e-07	0.000622203	0.0032875	0.00177576	0.00151376	0.000641933	4.84689e-07	0.00144389
631	Analyte 709	227	14.0127,0	19	221	0.000652084	4.67764e-07	4.39935e-07	4.24611e-07	0.000168789	0.000949061	0.000257875	0.000173083	0.000152333	0.000167584	0.000252214	0.000666553	0.000484528	0.000830204	0.00136011	0.000210445	0.00108084	0.000250409	0.000260258	4.95477e-07	4.91404e-07	0.000514434	0.000497886	0.000669131	0.000335683	0.00021112	4.84689e-07	0.000342861
633	2-Monoolein	543	14.258,0	19	103	0.0014744	4.67764e-07	4.39935e-07	4.24611e-07	0.000406389	0.00104156	5.22327e-07	0.000482355	4.19214e-07	0.000310788	0.000371777	4.85981e-07	0.00204602	0.00131799	5.40238e-07	0.00174357	0.00314759	0.00140858	0.00142845	0.000740214	0.000577353	0.00124108	0.00124812	0.00139674	0.0013288	5.04078e-07	0.000366472	0.000868129
634	cellobiose 2	595	14.2922,0	20	204	0.000433608	0.0002866	0.00041358	4.24611e-07	5.20543e-07	0.000571174	9.97394e-05	0.000509221	4.80875e-05	3.94947e-05	0.000240245	4.85981e-07	5.02499e-07	0.000673114	5.40238e-07	0.000272491	4.7977e-07	0.000285747	0.000601725	6.87253e-05	0.000168147	0.000207196	0.000549447	0.000498046	0.000496049	0.000544259	4.84689e-07	0.000417657
635	trehalose	705	14.3162,0	17	361	0.00108615	4.67764e-07	4.39935e-07	0.000134498	0.000352214	0.00078185	5.22327e-07	9.06579e-05	4.19214e-07	4.91404e-07	0.000244771	0.00188397	0.0010388	0.000955859	0.00197171	7.21909e-07	0.00164434	0.000601819	0.000803986	4.95477e-07	4.91404e-07	0.00089022	0.00074057	0.000818378	0.00083239	0.00071363	0.000205238	0.000662041
639	Monoolein	793	14.4007,0	25	129	0.00693165	0.0010592	0.00121175	0.00128693	0.0026625	0.0076932	0.00139324	0.00156256	0.00114222	0.00186457	0.00268078	4.85981e-07	5.02499e-07	0.00902782	5.40238e-07	0.00949794	0.01857	0.0258682	0.00843126	0.0053083	0.00450717	0.00812122	0.0106001	0.0109104	0.015759	0.0149058	0.004601	0.0113553
640	Analyte 721	315	14.4173,0	21	397	0.000448518	2.9676e-05	1.55766e-06	1.32959e-05	0.000190627	0.000297858	3.72693e-05	4.42375e-05	4.19214e-07	4.91404e-07	0.000106395	4.85981e-07	4.80296e-05	0.000349494	5.40238e-07	0.0005107	4.7977e-07	0.00131617	0.000705849	0.000367334	4.91404e-07	0.000329958	0.000571218	0.000707161	5.04078e-07	0.000744438	0.000305461	0.000465756
643	Leucrose 1	575	14.4802,0	25	103	0.00389076	0.000979771	0.00112457	0.000717373	0.00173674	0.00433238	0.00107006	0.00087386	0.000838343	0.000695974	0.00162598	0.00350186	0.00332979	0.00486233	0.00447339	0.00166976	0.00674948	0.00535496	0.0033087	0.000916705	0.000806111	0.00349731	0.00270738	0.00198433	0.00262197	0.00209928	0.000819769	0.00204655
644	guanosine	350	14.5204,0	18	221	0.00087972	4.67764e-07	4.39935e-07	4.24611e-07	0.000406003	0.00103425	5.22327e-07	4.47719e-07	0.000174858	0.000248168	0.00027453	0.001551	0.00118551	0.000997968	0.00130025	0.000339018	0.00155956	0.00107499	0.000719952	0.000254603	4.91404e-07	0.000898336	0.000612531	0.000617852	0.00063675	0.000665814	4.84689e-07	0.000506686
646	Sophorose 2	507	14.6053,0	24	166	0.00364767	0.000832028	0.00109558	0.000500378	0.0026054	0.00375527	0.000827032	0.000583884	0.000503183	0.000577378	0.00149278	0.00504571	0.00363979	0.00443896	0.00544767	0.0018674	0.00467229	0.00363453	0.00222488	0.000863968	0.000650052	0.00324852	0.000461563	0.000650605	0.000865938	0.000511737	4.84689e-07	0.000498066
648	unknown	465	14.6769,0	20	73	0.00797707	4.67764e-07	0.00177443	4.24611e-07	0.00546377	0.00883576	5.22327e-07	4.47719e-07	0.00158074	4.91404e-07	0.00256341	0.0126343	0.00598222	0.0100301	5.40238e-07	0.00971888	0.00746778	0.00527029	0.00570229	0.00164431	0.00142007	0.00598708	0.0119702	0.00747536	0.0143105	0.00583348	0.00197607	0.00831312
653	Epicatechin	281	14.8708,0	15	297	0.000263671	4.67764e-07	4.39935e-07	4.24611e-07	0.000341131	0.000366367	1.56212e-05	4.47719e-07	4.19214e-07	0.00013426	0.000112325	4.85981e-07	0.000137646	0.000297504	0.000292822	0.000171556	4.7977e-07	0.000252955	0.000169547	4.95477e-07	4.91404e-07	0.000132398	0.000185665	0.000300947	0.000284441	0.000248999	4.84689e-07	0.000204107
654	Digalacturonic acid 2	511	14.9881,0	20	332	0.000518215	0.000307723	4.39935e-07	7.97513e-05	0.000499697	0.000669312	5.22327e-07	4.47719e-07	7.35388e-05	4.91404e-07	0.000215014	0.000312678	0.000274833	0.000717971	0.000347542	0.000594088	0.00030768	0.000773016	0.000249421	0.000454388	4.91404e-07	0.000403211	0.000430438	0.000486343	0.000688744	0.000578745	0.000251397	0.000487134
655	Anandamide 2	426	15.012,0	11	91	4.77128e-07	4.67764e-07	4.39935e-07	4.24611e-07	0.000316559	0.00043825	5.22327e-07	4.47719e-07	4.19214e-07	4.91404e-07	7.58499e-05	4.85981e-07	0.00044478	5.15058e-07	5.40238e-07	0.000468497	0.000684824	0.000493405	5.12616e-07	0.000308746	4.91404e-07	0.00024028	5.40823e-07	0.000556523	0.000670181	0.000676735	4.84689e-07	0.000380893
657	naringenin 1	314	15.09,0	19	221	0.0013786	0.000481797	4.39935e-07	4.24611e-07	0.000682578	0.00124435	0.000218258	4.47719e-07	4.19214e-07	4.91404e-07	0.000400781	0.00116004	0.000777495	0.000926037	0.00131982	0.00071843	0.00153575	0.000932418	0.000907269	0.000622591	4.91404e-07	0.000890035	0.000543479	0.000710504	0.000875396	0.000991973	0.000456707	0.000715612
660	Analyte 746	430	15.3578,0	22	105	0.00137186	0.00119663	4.39935e-07	4.24611e-07	0.00204335	0.00104693	0.00042511	4.47719e-07	0.000299717	0.000274308	0.000665922	0.000928035	0.00123412	0.00179292	5.40238e-07	0.00154851	4.7977e-07	0.00234628	0.00157734	0.0017435	0.000292476	0.00114642	0.000731212	0.00241282	0.00277375	0.00265736	0.000646615	0.00184435
663	hydrocortisone	429	15.4576,0	25	119	0.00256971	0.00149842	0.000345787	0.000462234	0.00283188	0.00301978	0.000499736	0.00146471	0.000315208	0.000921429	0.00139289	0.00194811	0.00318885	5.15058e-07	0.00277303	0.00293853	0.00582956	0.00542778	0.00470798	0.00322838	0.000894461	0.00309372	0.0039745	0.00472174	0.00520099	0.00498291	0.0017142	0.00411887
665	unknown	341	15.6881,0	24	243	0.0653609	0.0473036	0.0114766	0.0261943	0.0630703	0.0716064	0.0185666	0.013573	0.0100833	0.0477342	0.0374969	0.0709062	5.02499e-07	0.0694557	0.0961678	0.0853517	0.0596672	0.0917744	0.0934104	0.0744237	0.0378619	0.0679019	0.0205605	0.0558885	0.0646848	0.0724898	0.0491905	0.0525628
666	Analyte 755	359	15.6974,0	25	357	0.0205204	0.0163111	0.00504083	0.00983336	0.0216953	0.0222646	0.00717845	0.00534351	0.00437914	0.0171858	0.0129752	0.0265216	0.0268301	0.0225359	0.0352295	0.0292344	0.0195184	0.0312762	0.0315984	0.0256662	0.0135789	0.026199	0.00668518	0.0180038	0.0218336	0.0245321	0.0173747	0.0176859
668	Analyte 757	375	15.7563,0	18	221	4.77128e-07	4.67764e-07	4.39935e-07	0.000403137	0.000698026	0.00120341	5.22327e-07	4.47719e-07	4.19214e-07	0.000608646	0.000291599	0.00097188	0.000899286	0.00140241	0.00108709	0.00121135	0.00101003	0.00101179	0.0010524	0.000919688	0.000550358	0.00101163	5.40823e-07	0.000829156	0.00153177	0.000971133	0.000699038	0.000806327
674	Analyte 767	249	16.4523,0	25	237	0.00749441	0.0095592	4.39935e-07	0.00679388	0.0104059	0.012684	0.00784978	0.00448209	0.00287154	0.009779	0.00719202	0.00720065	0.00728234	0.00637437	0.0074792	0.0189556	0.00788045	0.0100926	5.12616e-07	4.95477e-07	0.00759988	0.0072866	0.00428274	0.00830191	0.0123132	0.00865518	0.0154088	0.00979236
675	5-Dihydrocortisol 1	403	16.5287,0	15	119	4.77128e-07	4.67764e-07	4.39935e-07	0.000778056	5.20543e-07	5.34049e-07	5.22327e-07	0.00157328	4.19214e-07	0.00105143	0.000340614	0.000635503	0.000859857	0.000632524	5.40238e-07	0.0018802	0.000907136	0.00192334	0.00259043	0.00220359	0.00127379	0.00129069	5.40823e-07	0.000590551	0.000821413	0.0017579	4.84689e-07	0.000634178
676	cholesterol	850	16.6764,0	25	129	0.792987	1.36151	1.14102	1.24322	1.02729	1.1512	1.59161	0.999475	1.17342	1.56921	1.20509	1.68123	1.69281	0.993666	1.66415	2.15613	1.10941	1.55354	1.98168	1.88421	1.39134	1.61082	0.929328	0.895711	0.526966	1.16938	1.93893	1.09206
677	Cortexolone 4	269	16.7353,0	24	216	0.0013709	0.00259982	0.000727404	0.00123962	0.00164699	0.00175284	0.00230418	0.00117642	4.19214e-07	0.00221832	0.00150369	0.00202605	0.00278663	0.0012621	0.0031777	0.00558437	0.00159161	0.00321458	0.00336046	0.00416452	0.00135264	0.00285207	0.00125	0.00183426	0.00248695	0.00309487	0.0021537	0.00216396
678	trehalose-6-phosphate	427	16.7667,0	23	357	0.00298034	0.00550815	4.39935e-07	0.00349549	0.00433191	0.0037943	0.00613275	0.00314417	4.19214e-07	0.00603534	0.00354233	0.00911202	0.0105945	0.00395661	0.016209	0.00964141	0.00774017	0.00790491	5.12616e-07	0.00928884	0.00410485	0.00785529	0.000243452	0.00305419	0.00472441	0.00798313	0.00661134	0.0045233
680	21-hydroxypregnenolone 1	321	16.9126,0	24	357	0.0019938	0.00927568	0.00439528	0.00545284	0.00892091	0.00735702	0.00839085	0.00364654	0.00122832	0.00833956	0.00590008	0.00883154	0.00896579	0.00331773	0.0060899	0.0142242	0.00697659	0.0106761	0.00522536	0.00742618	0.00718281	0.00789163	5.40823e-07	0.00217554	0.00406944	0.00507693	0.0151209	0.00528866
681	unknown	342	17.0289,0	12	117	0.00230446	4.67764e-07	0.00145437	0.00157525	0.000973019	0.00124095	5.22327e-07	4.47719e-07	4.19214e-07	4.91404e-07	0.00075504	4.85981e-07	0.0019192	5.15058e-07	5.40238e-07	7.21909e-07	4.7977e-07	6.05777e-07	5.12616e-07	4.95477e-07	4.91404e-07	0.000192405	0.00132258	0.00416457	0.00580418	0.00307972	0.00773689	0.00442159
684	Ergosterol	529	17.3983,0	25	129	0.0140793	0.0174015	0.0125682	0.0216239	0.0182417	0.00478476	5.22327e-07	0.0182055	0.0136557	0.0190496	0.0139611	0.00777436	0.0111185	0.0149498	0.0112852	0.0227899	0.0104092	0.02685	0.0143285	0.0170304	4.91404e-07	0.0136536	0.00637671	0.0106998	0.0138528	0.013114	0.0236666	0.013542
689	24,25-dihydrolanosterol	551	18.1188,0	25	129	0.00285401	0.00203379	0.00483206	0.00302452	0.00305946	0.00187488	5.22327e-07	4.47719e-07	0.0042729	4.91404e-07	0.00219531	0.00137774	0.00312269	0.00317683	0.00464766	0.0055723	0.0031985	0.00341433	0.00414276	0.00297823	0.00527261	0.00369037	0.00253721	0.0023827	0.00359295	0.00438012	0.00430529	0.00343966
690	1-Kestose	491	18.1503,0	19	361	0.000335454	0.00043637	0.000692209	0.000415664	0.000710937	0.000681562	0.000874676	4.47719e-07	0.000421728	4.91404e-07	0.000456954	0.000988958	0.000756419	0.000636349	0.000847048	7.21909e-07	0.000888435	0.000936091	0.000898316	4.95477e-07	4.91404e-07	0.000595332	5.40823e-07	0.000440932	5.04078e-07	0.000660325	0.000702378	0.000360936
691	Cholestane-3,5,6-triol, (3beta ,5alpha ,6beta)-	438	18.486,0	25	441	0.0450215	0.040955	4.39935e-07	0.0587392	0.0570194	0.0774818	0.112263	4.47719e-07	4.19214e-07	0.0669658	0.0458446	0.0423864	0.0388989	0.0491913	0.0361948	0.0983352	0.0413679	0.0756578	0.0754722	0.0566347	0.0793943	0.0593534	0.0140232	0.0186805	0.0211442	0.0267003	0.0362678	0.0233632
